# Supplementary material for: Recalibrating timing behavior via expected covariance between temporal cues
Source: eLife journal article supplement (doi:10.7554/elife.38790), 2018-11-02
Supplement: supp [file elife-38790-supp-v1.zip]

Archive with 21 entries (21 files):
- elife_poa_e38790_Figure_5_figure_supplement_1.pdf
- elife_poa_e38790_Figure_4_figure_supplement_1.pdf
- elife_poa_e38790_Figure_1_source_data_1.zip
- elife_poa_e38790_Figure_3_source_data_1.zip
- elife_poa_e38790_Figure_5_source_data_1.zip
- elife_poa_e38790_Transparent_Reporting_File.docx
- elife_poa_e38790_Figure_1_figure_supplement_3_source_data_1.zip
- elife_poa_e38790_Figure_6_figure_supplement_1_source_data_1.zip
- elife_poa_e38790_Source_data_1.zip
- elife_poa_e38790_Figure_4_source_data_1.zip
- elife_poa_e38790_Figure_1_figure_supplement_1_source_data_1.zip
- elife_poa_e38790_Figure_1_figure_supplement_1.pdf
- elife_poa_e38790_Figure_2_source_data_1.zip
- elife_poa_e38790_Figure_1_figure_supplement_2_source_data_1.zip
- elife_poa_e38790_Figure_6_source_data_1.zip
- elife_poa_e38790_Figure_1_figure_supplement_3.pdf
- elife_poa_e38790_Figure_5_figure_supplement_1_source_data_1.zip
- elife_poa_e38790_Figure_6_figure_supplement_1.pdf
- elife_poa_e38790_Figure_7_source_data_1.zip
- elife_poa_e38790_Figure_1_figure_supplement_2.pdf
- elife_poa_e38790_Figure_4_figure_supplement_1_source_data_1.zip
