# Supplementary material for: Recalibrating timing behavior via expected covariance between temporal cues
Source: eLife journal article supplement (doi:10.7554/elife.38790), 2018-11-02

### A. 8-to-4 Group

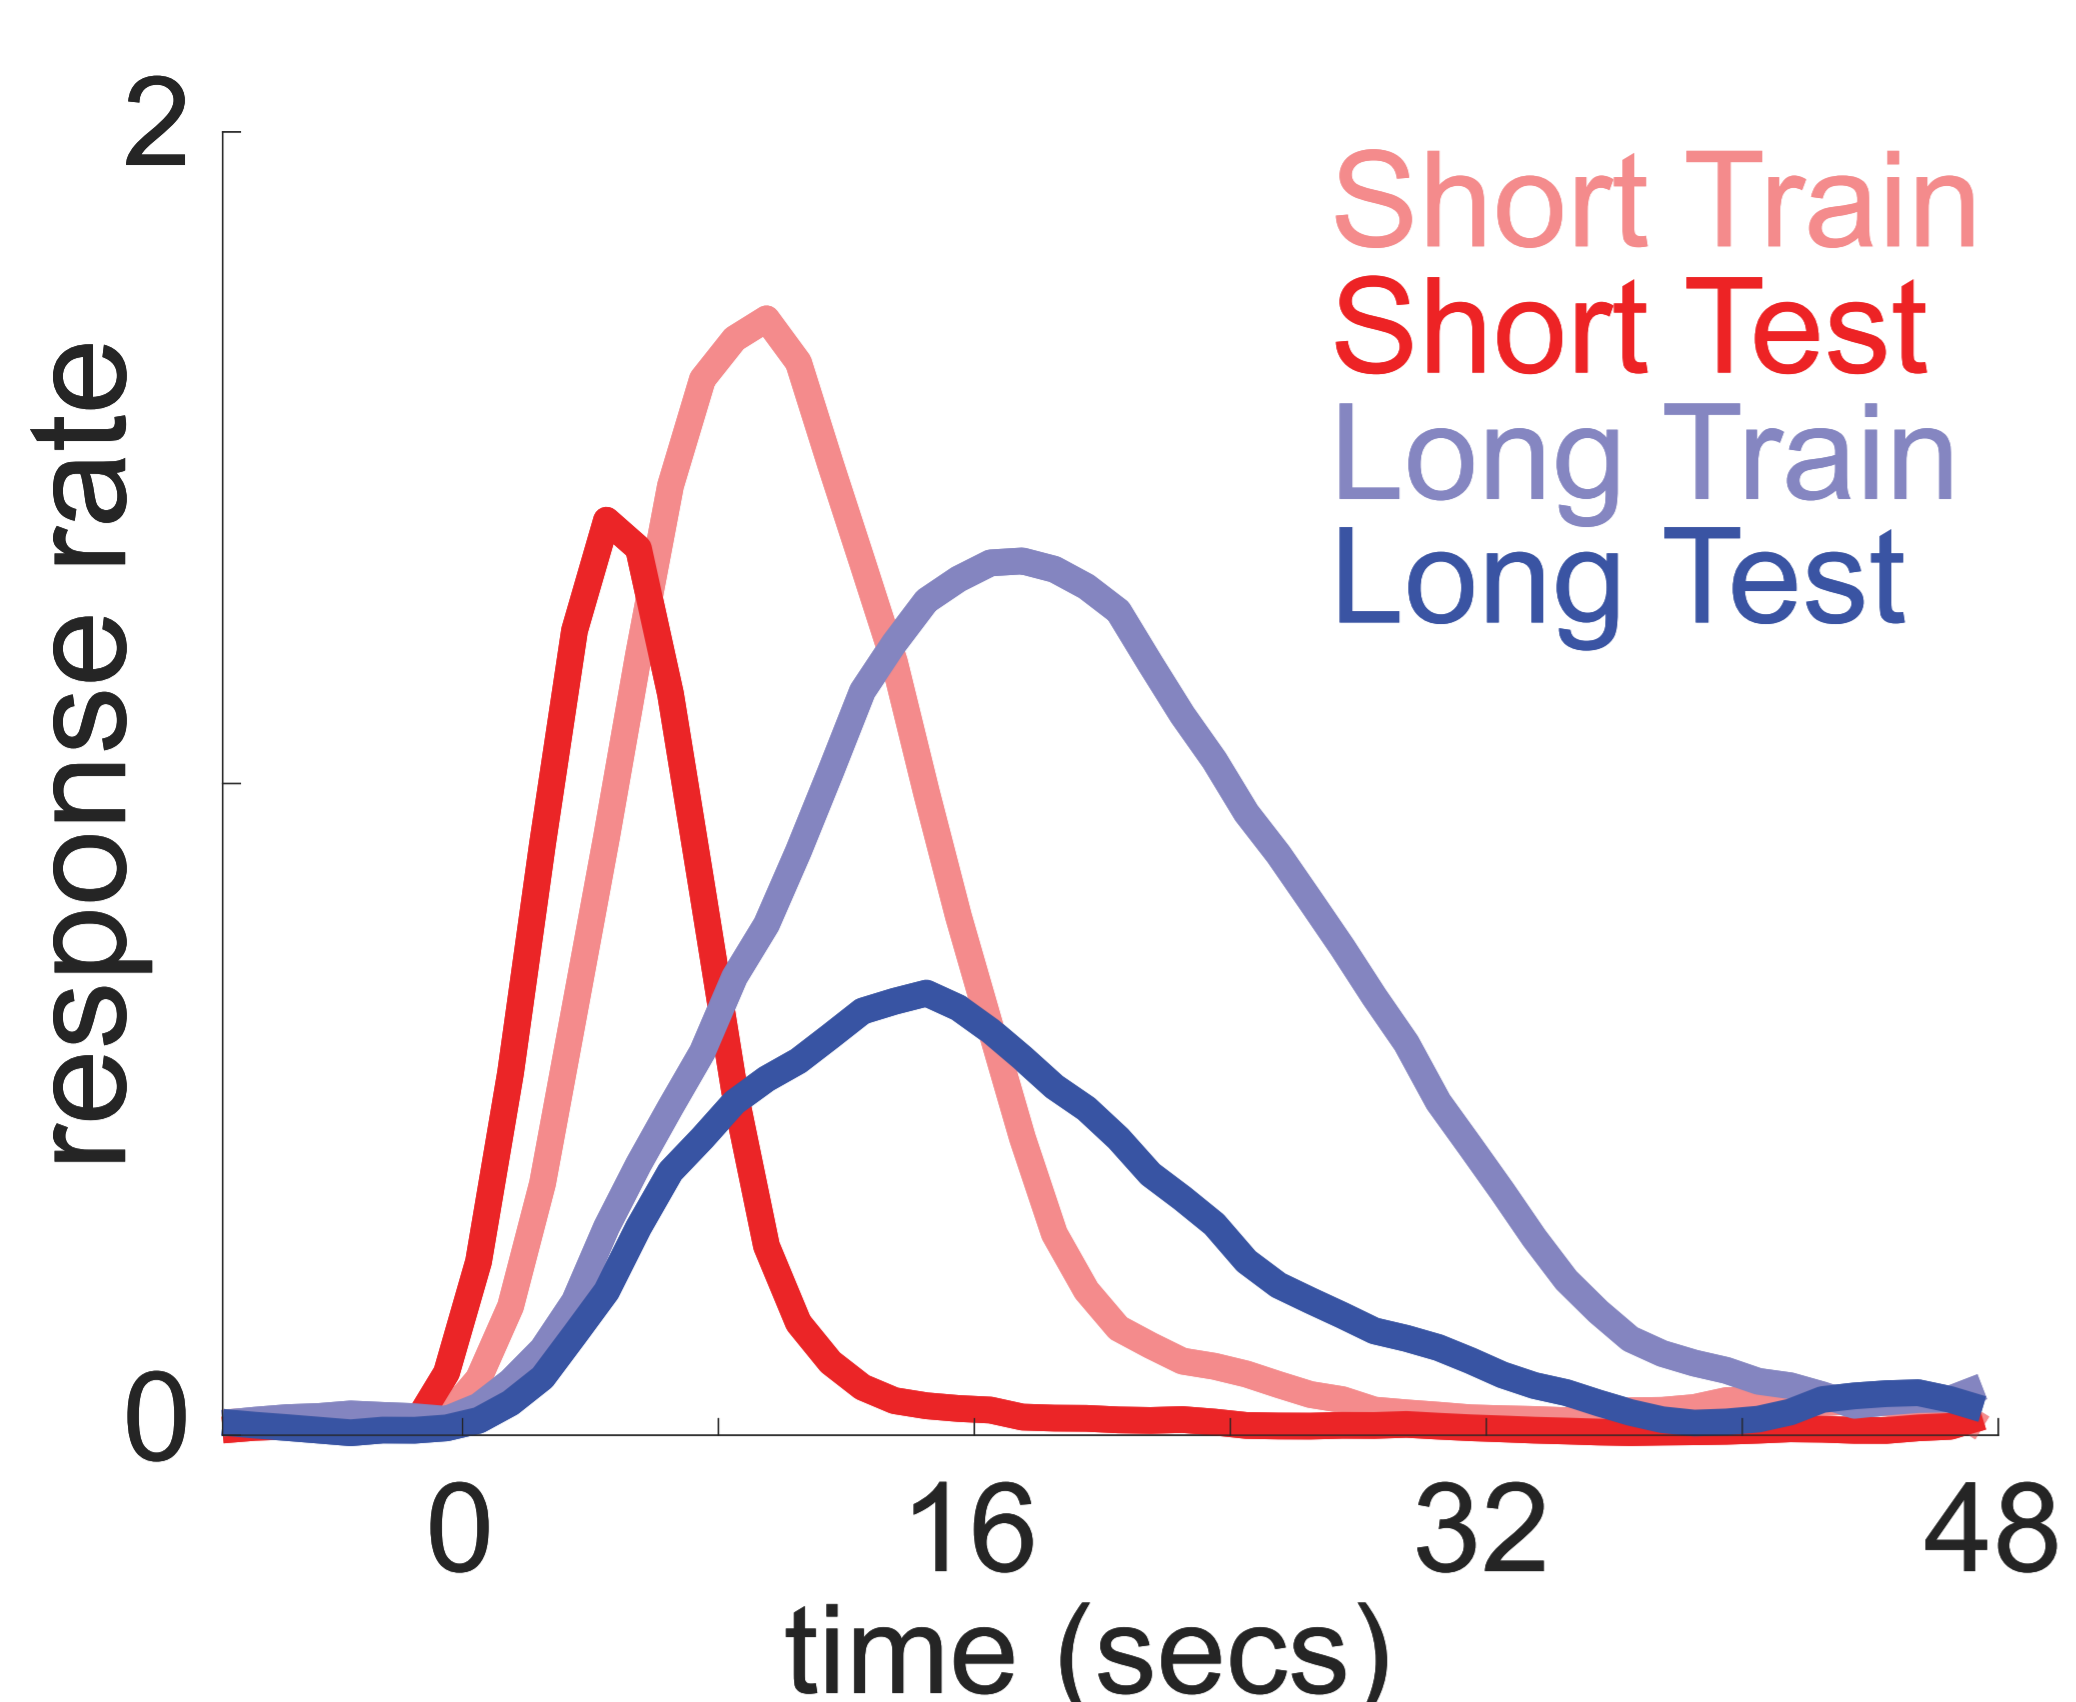

## 16-to-32 Group

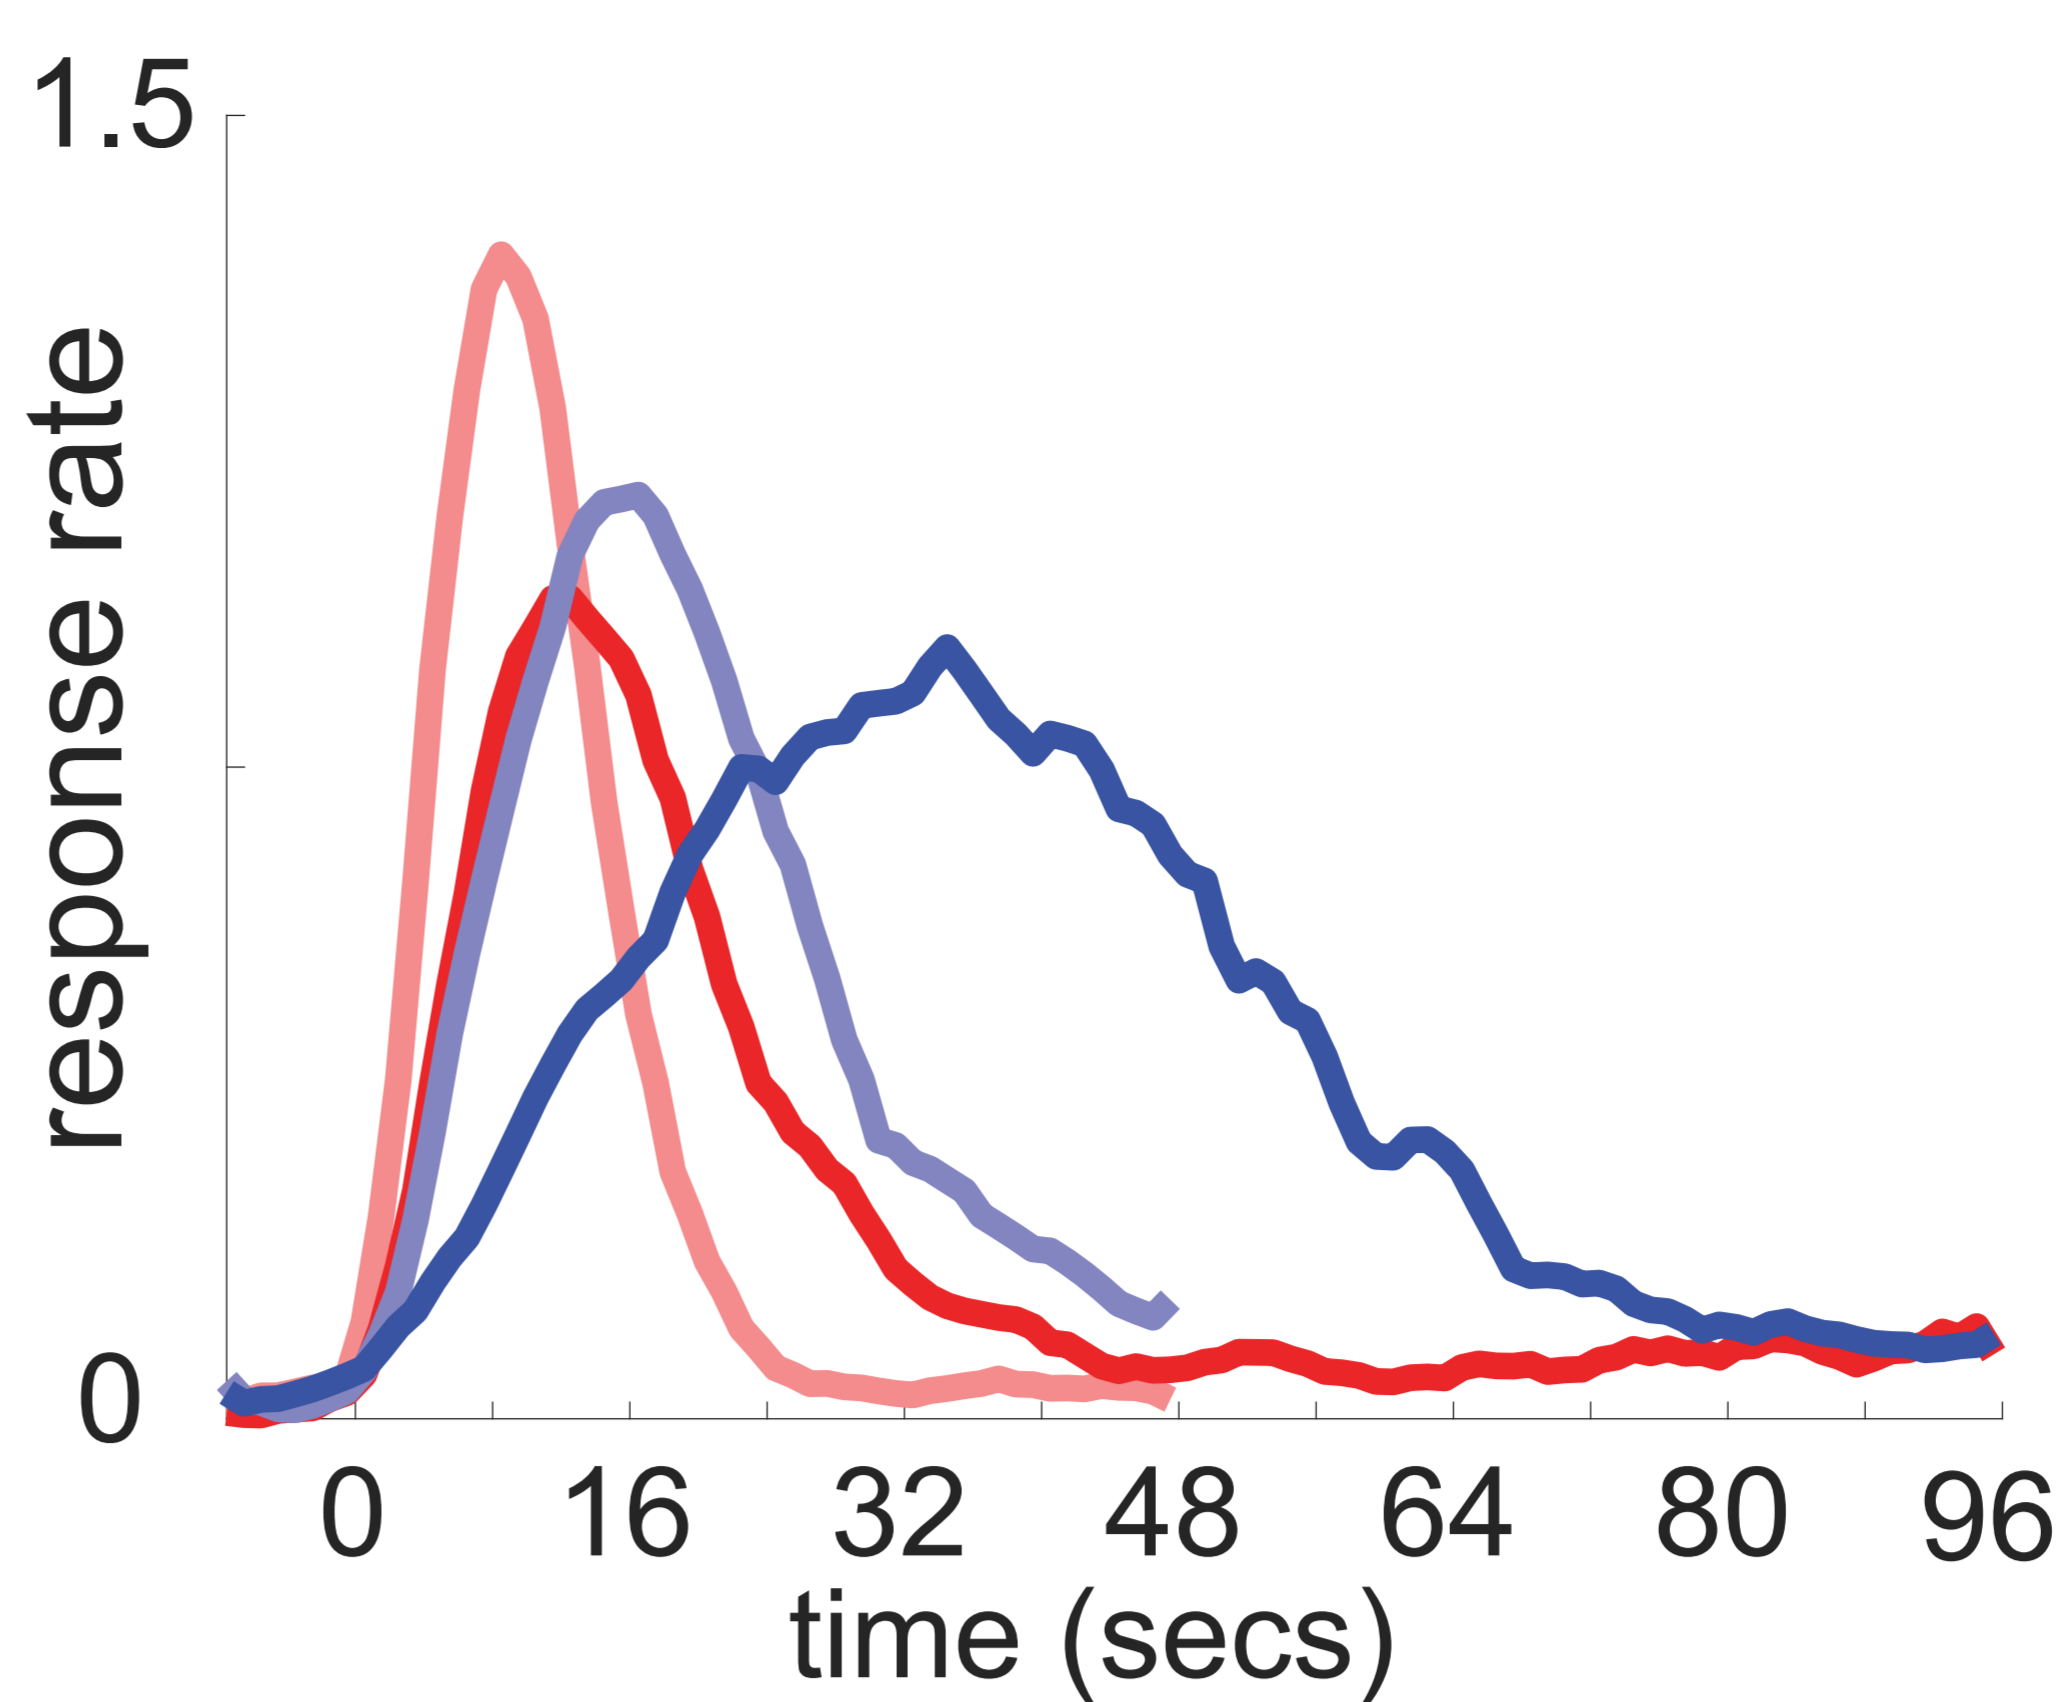

### B. 8-to-8 Group

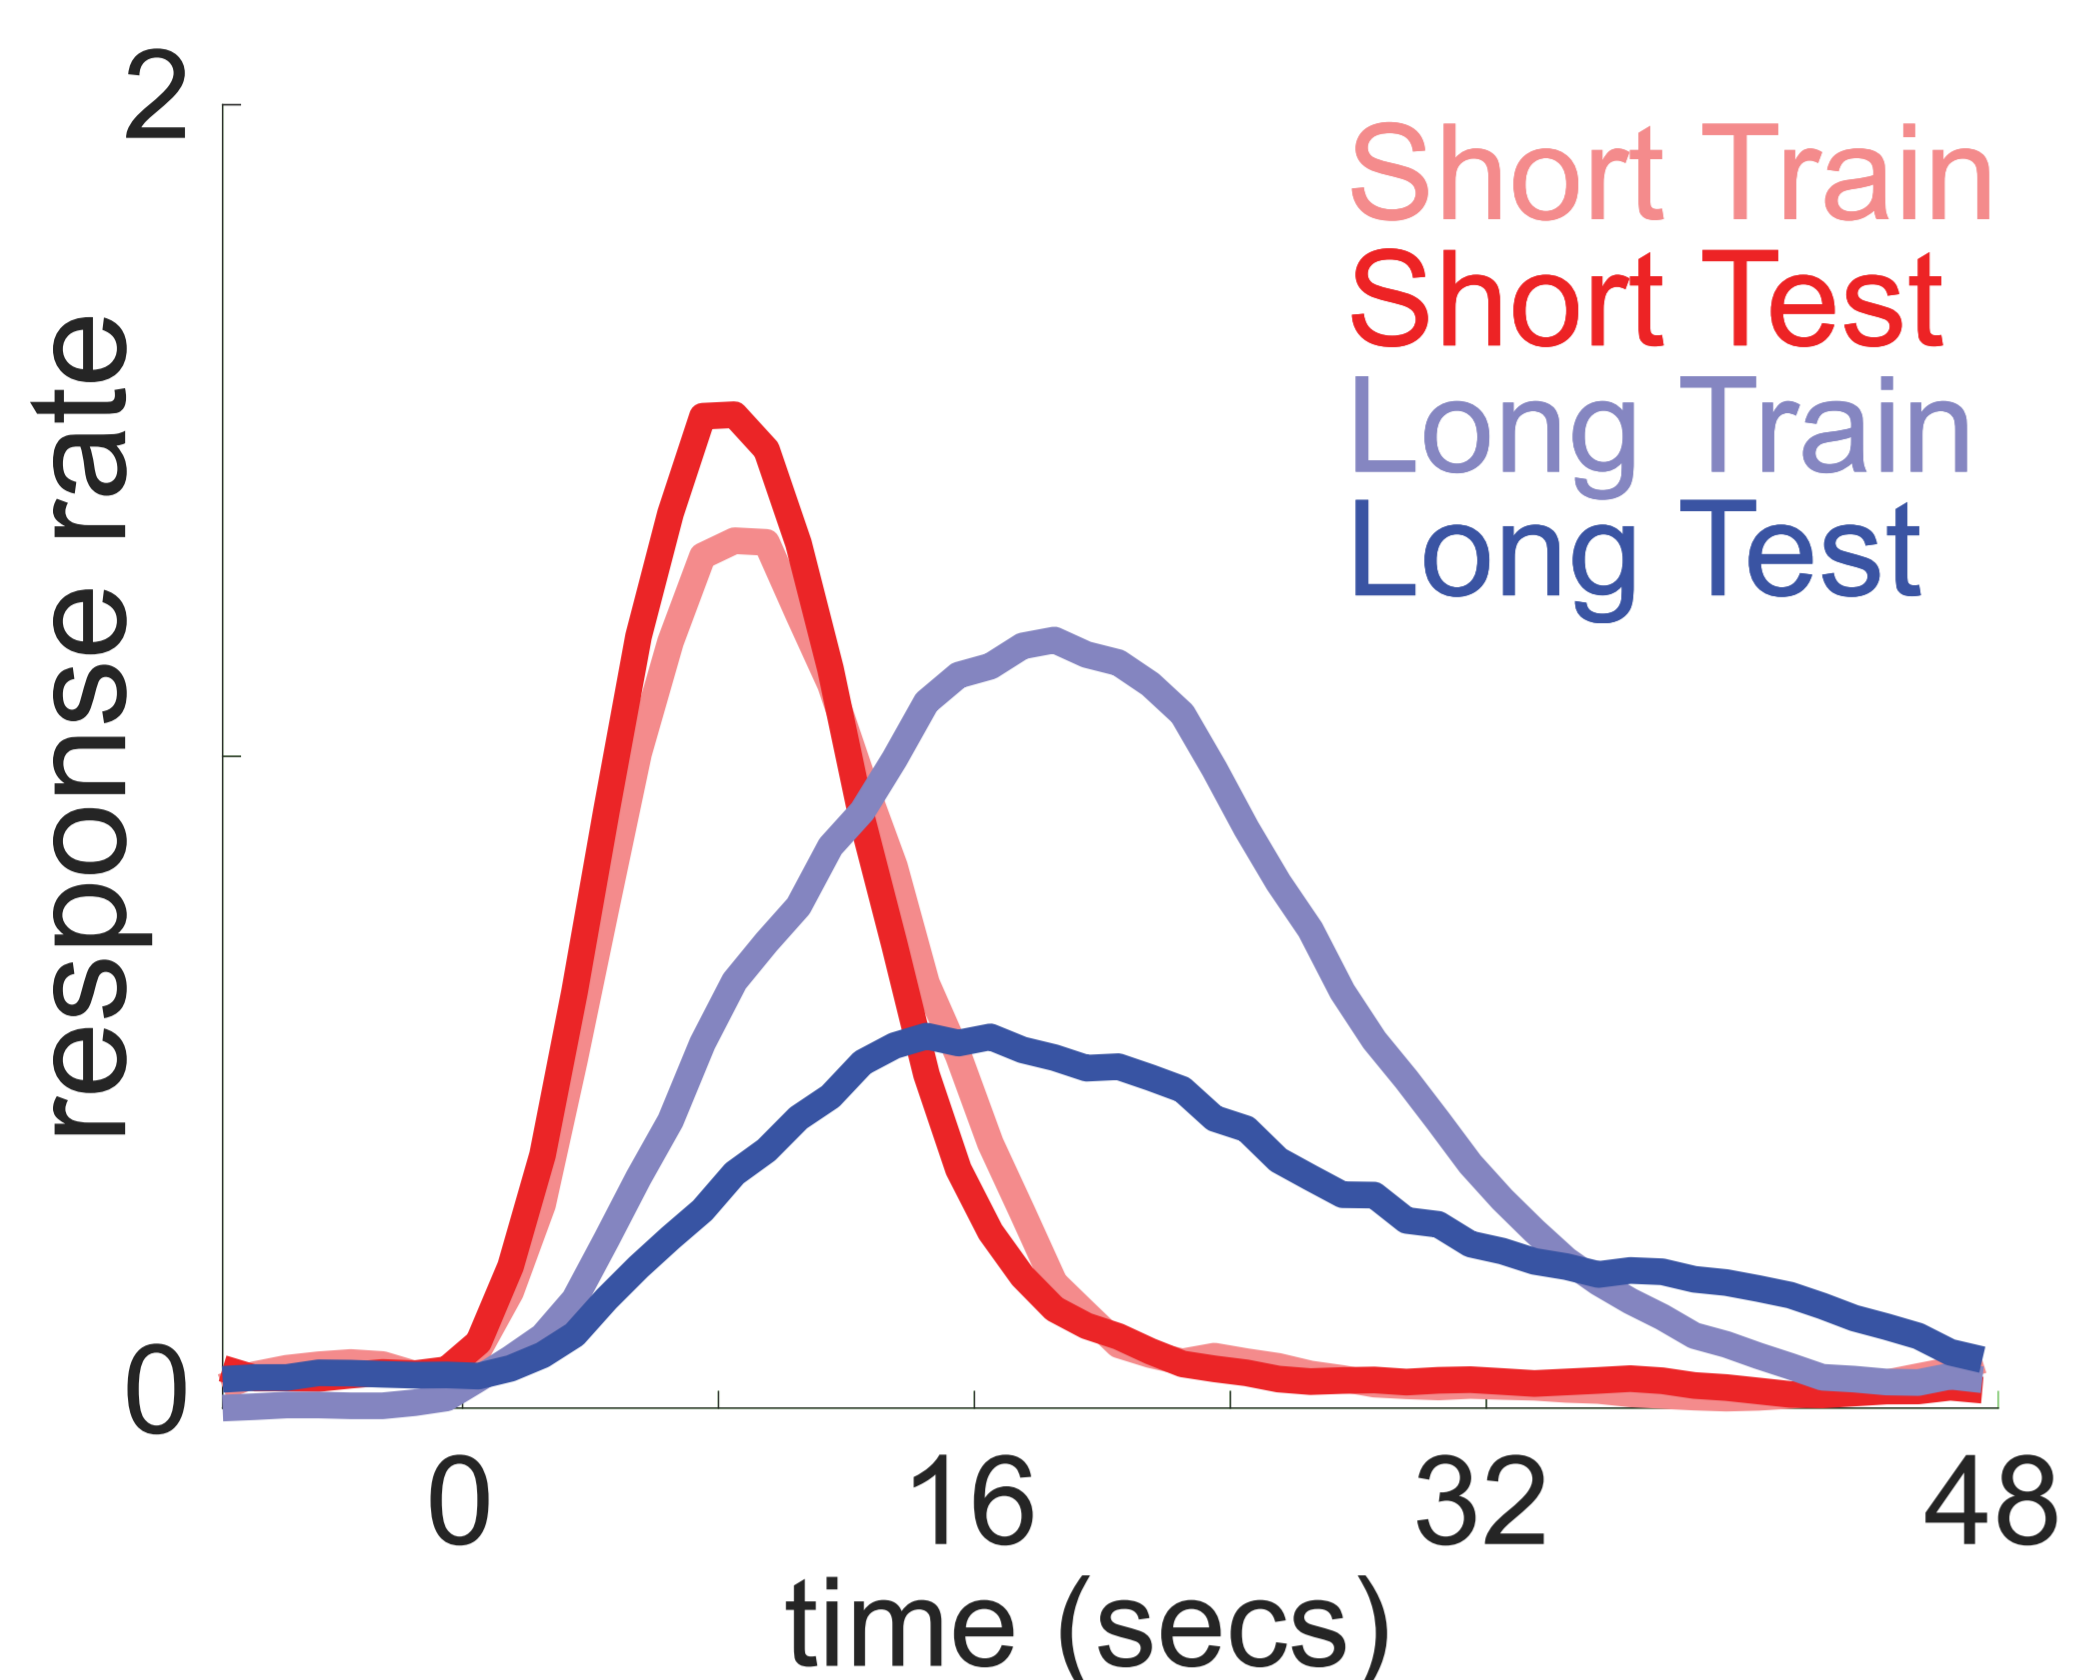

### C. 8-to-12 Group

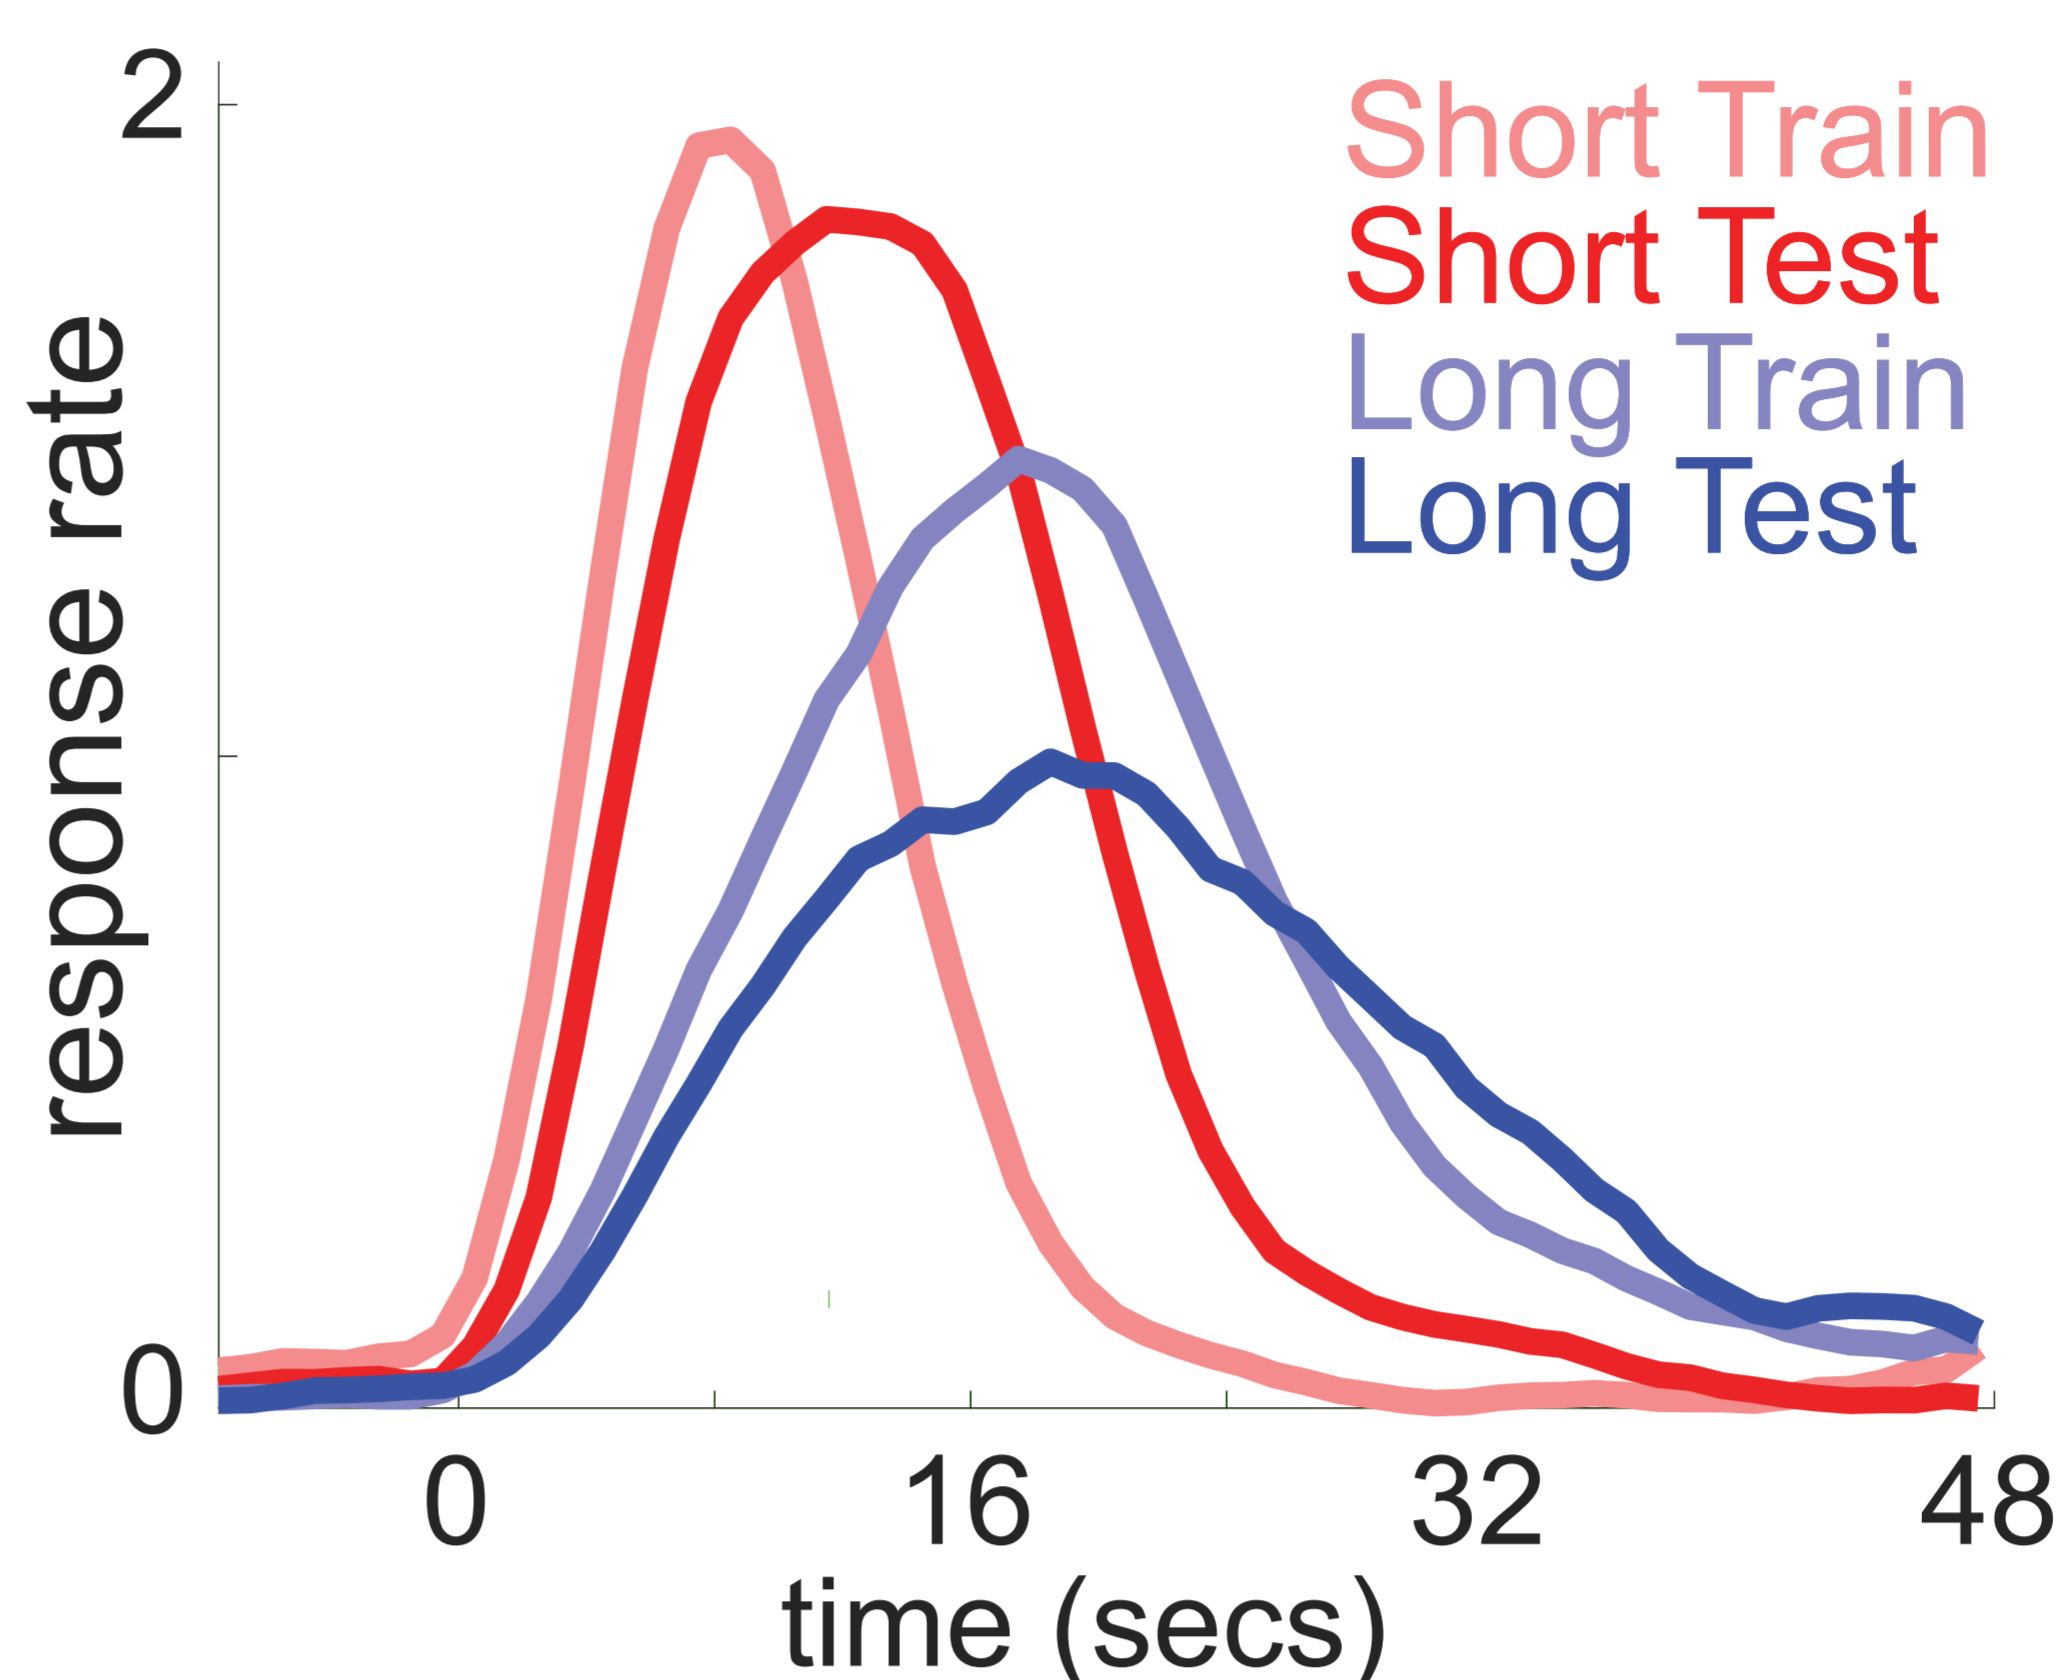

## D. Change Group

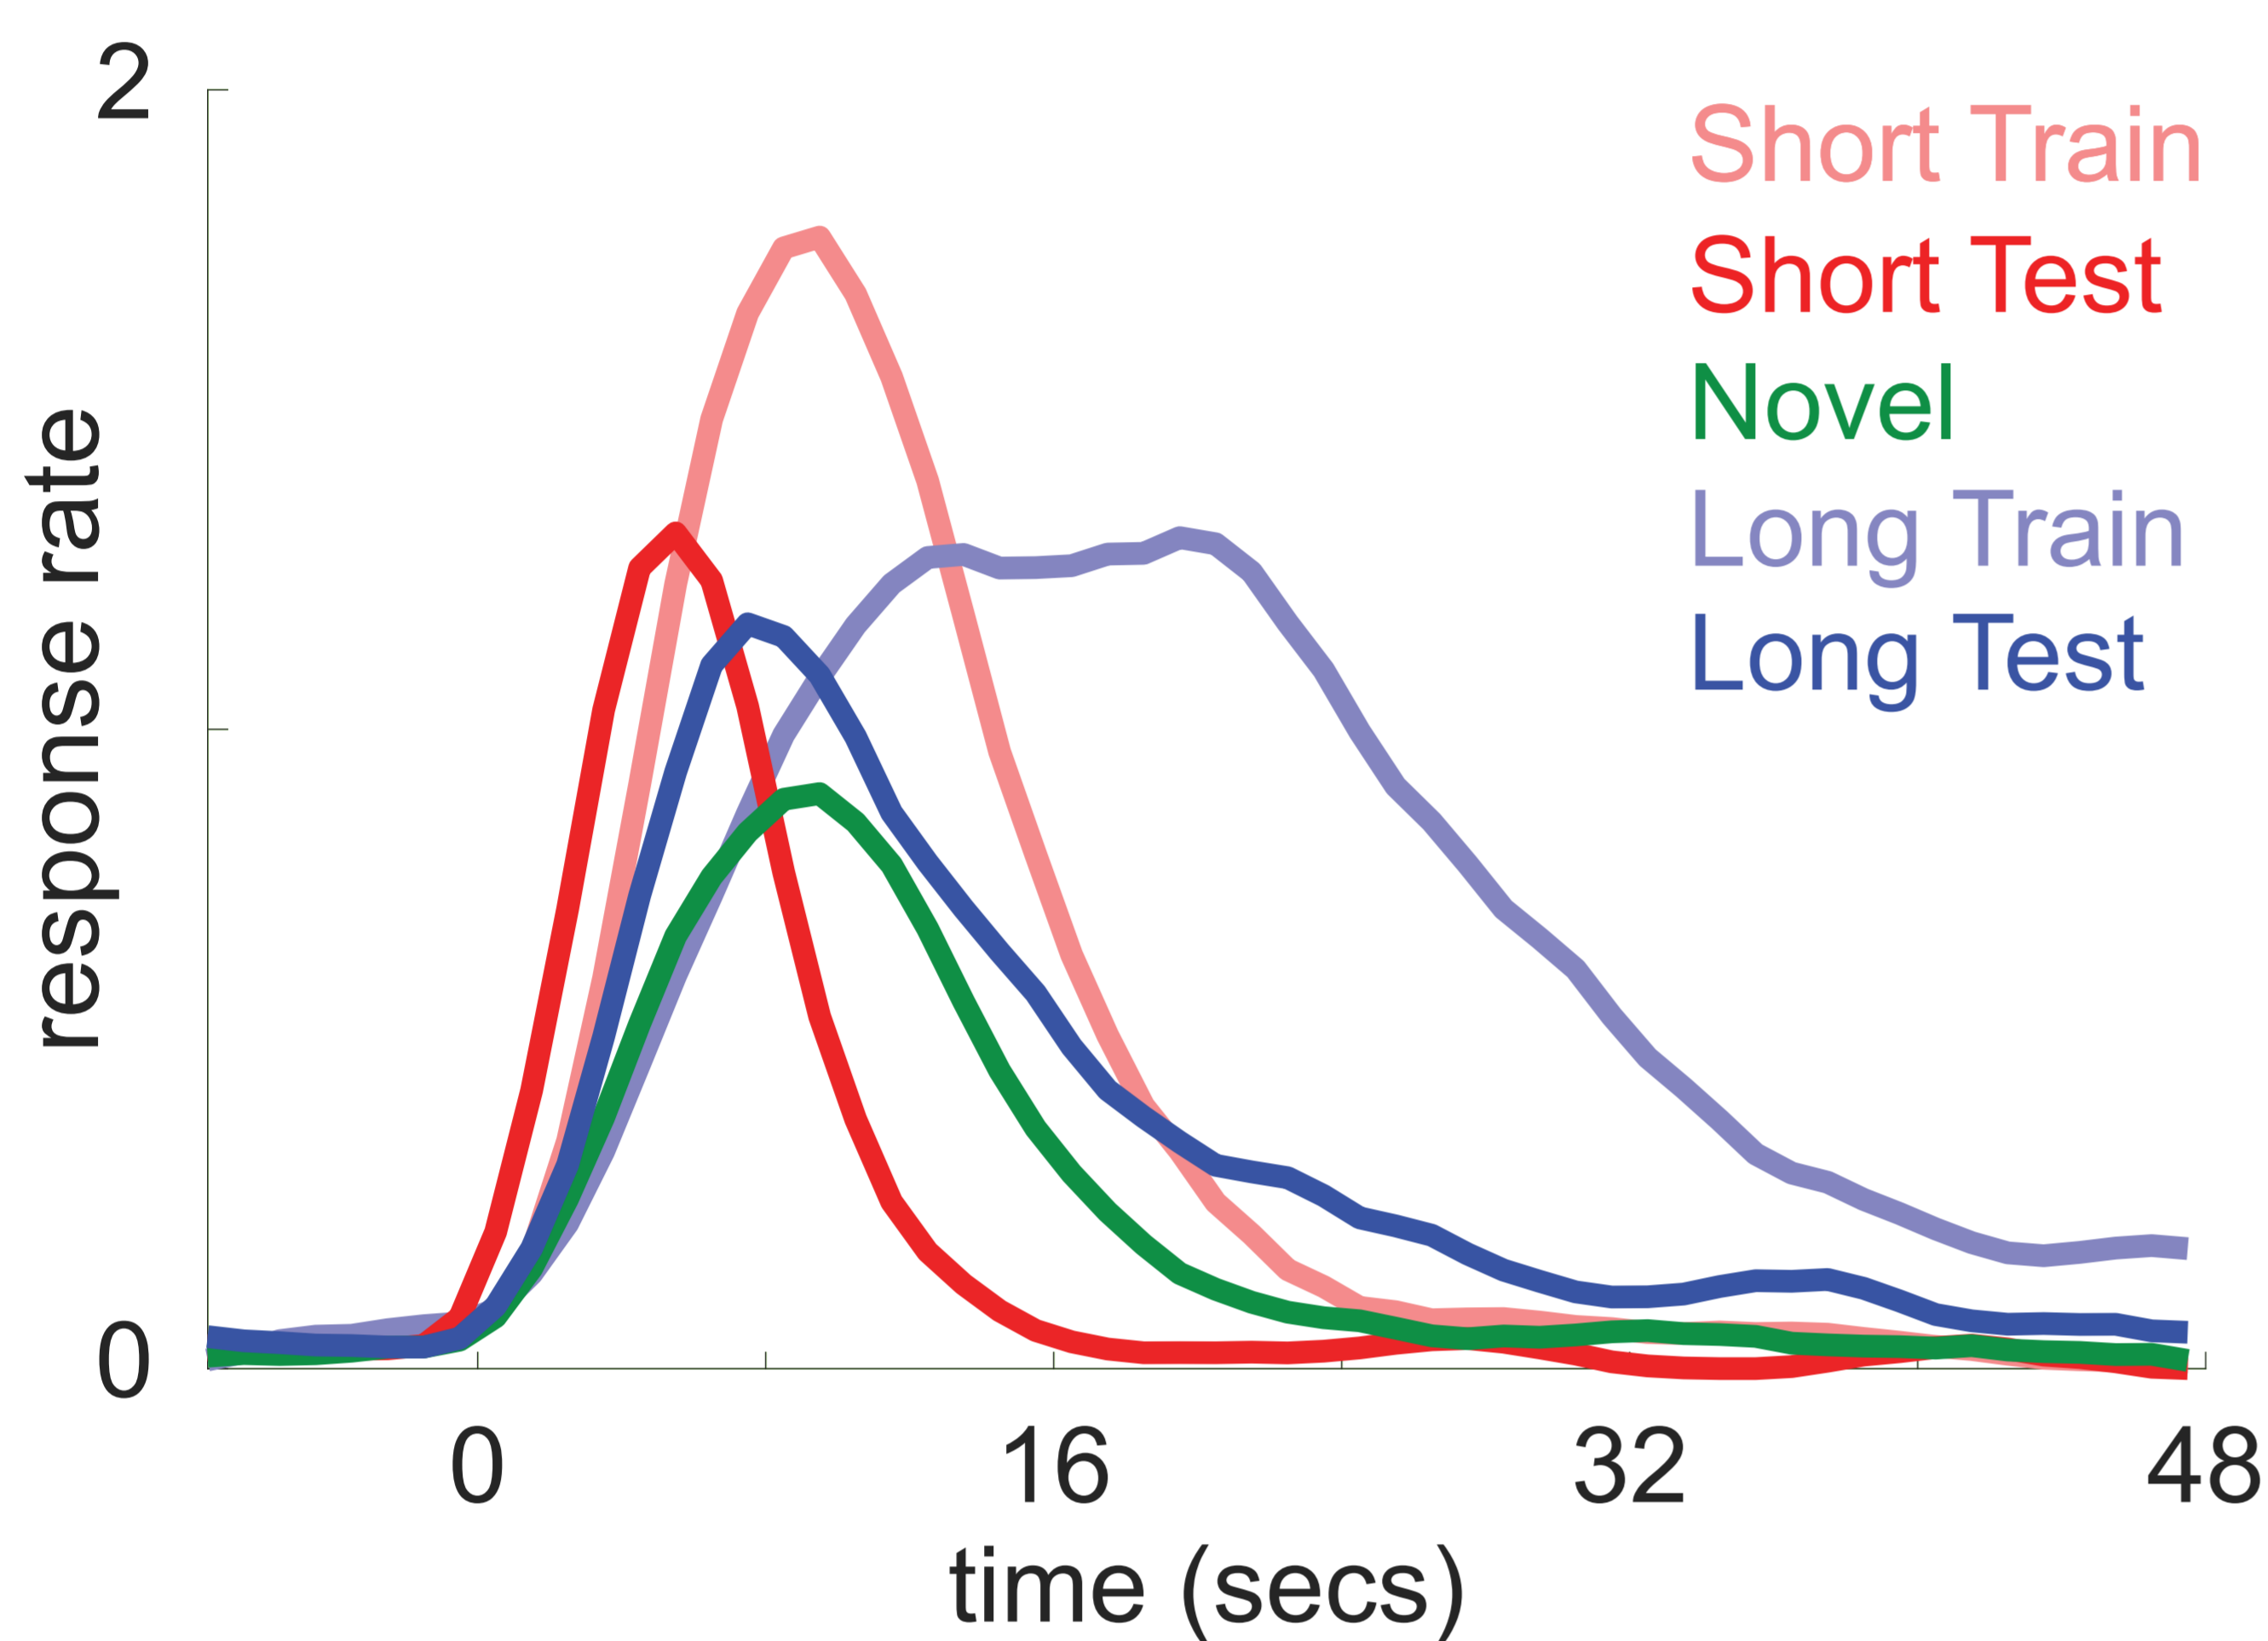

### No Change Group

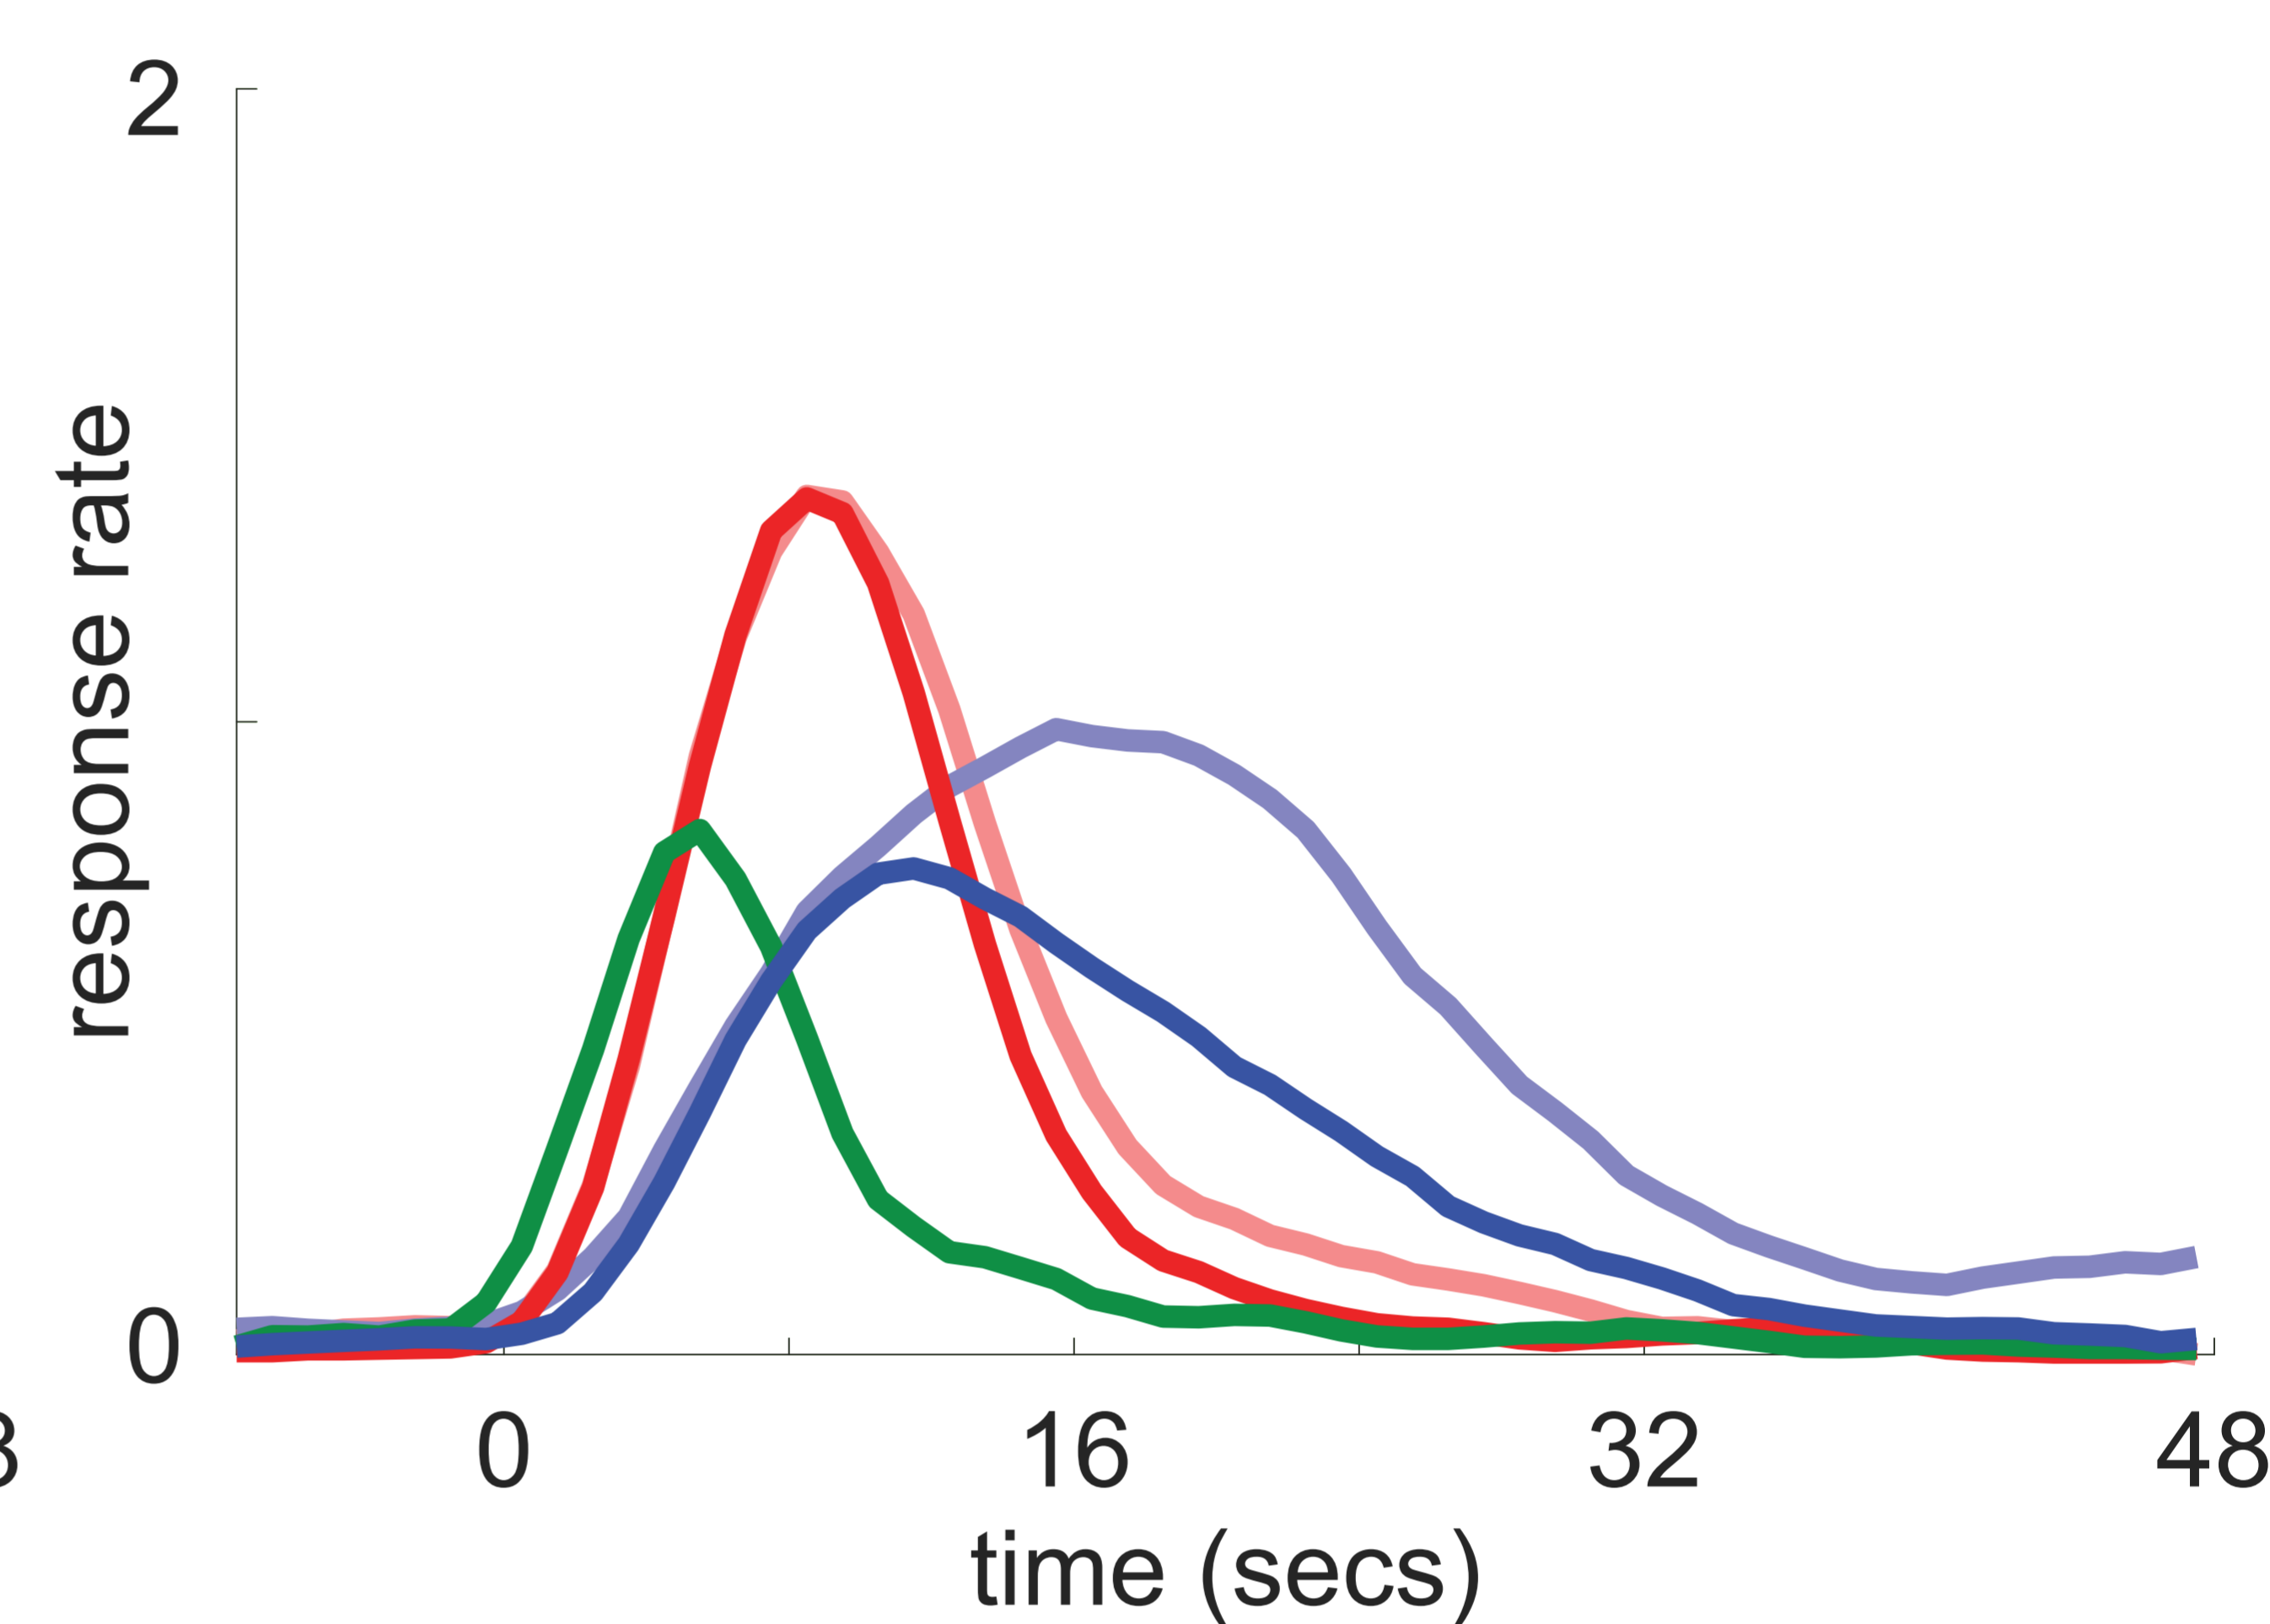

## E. Correlated Group

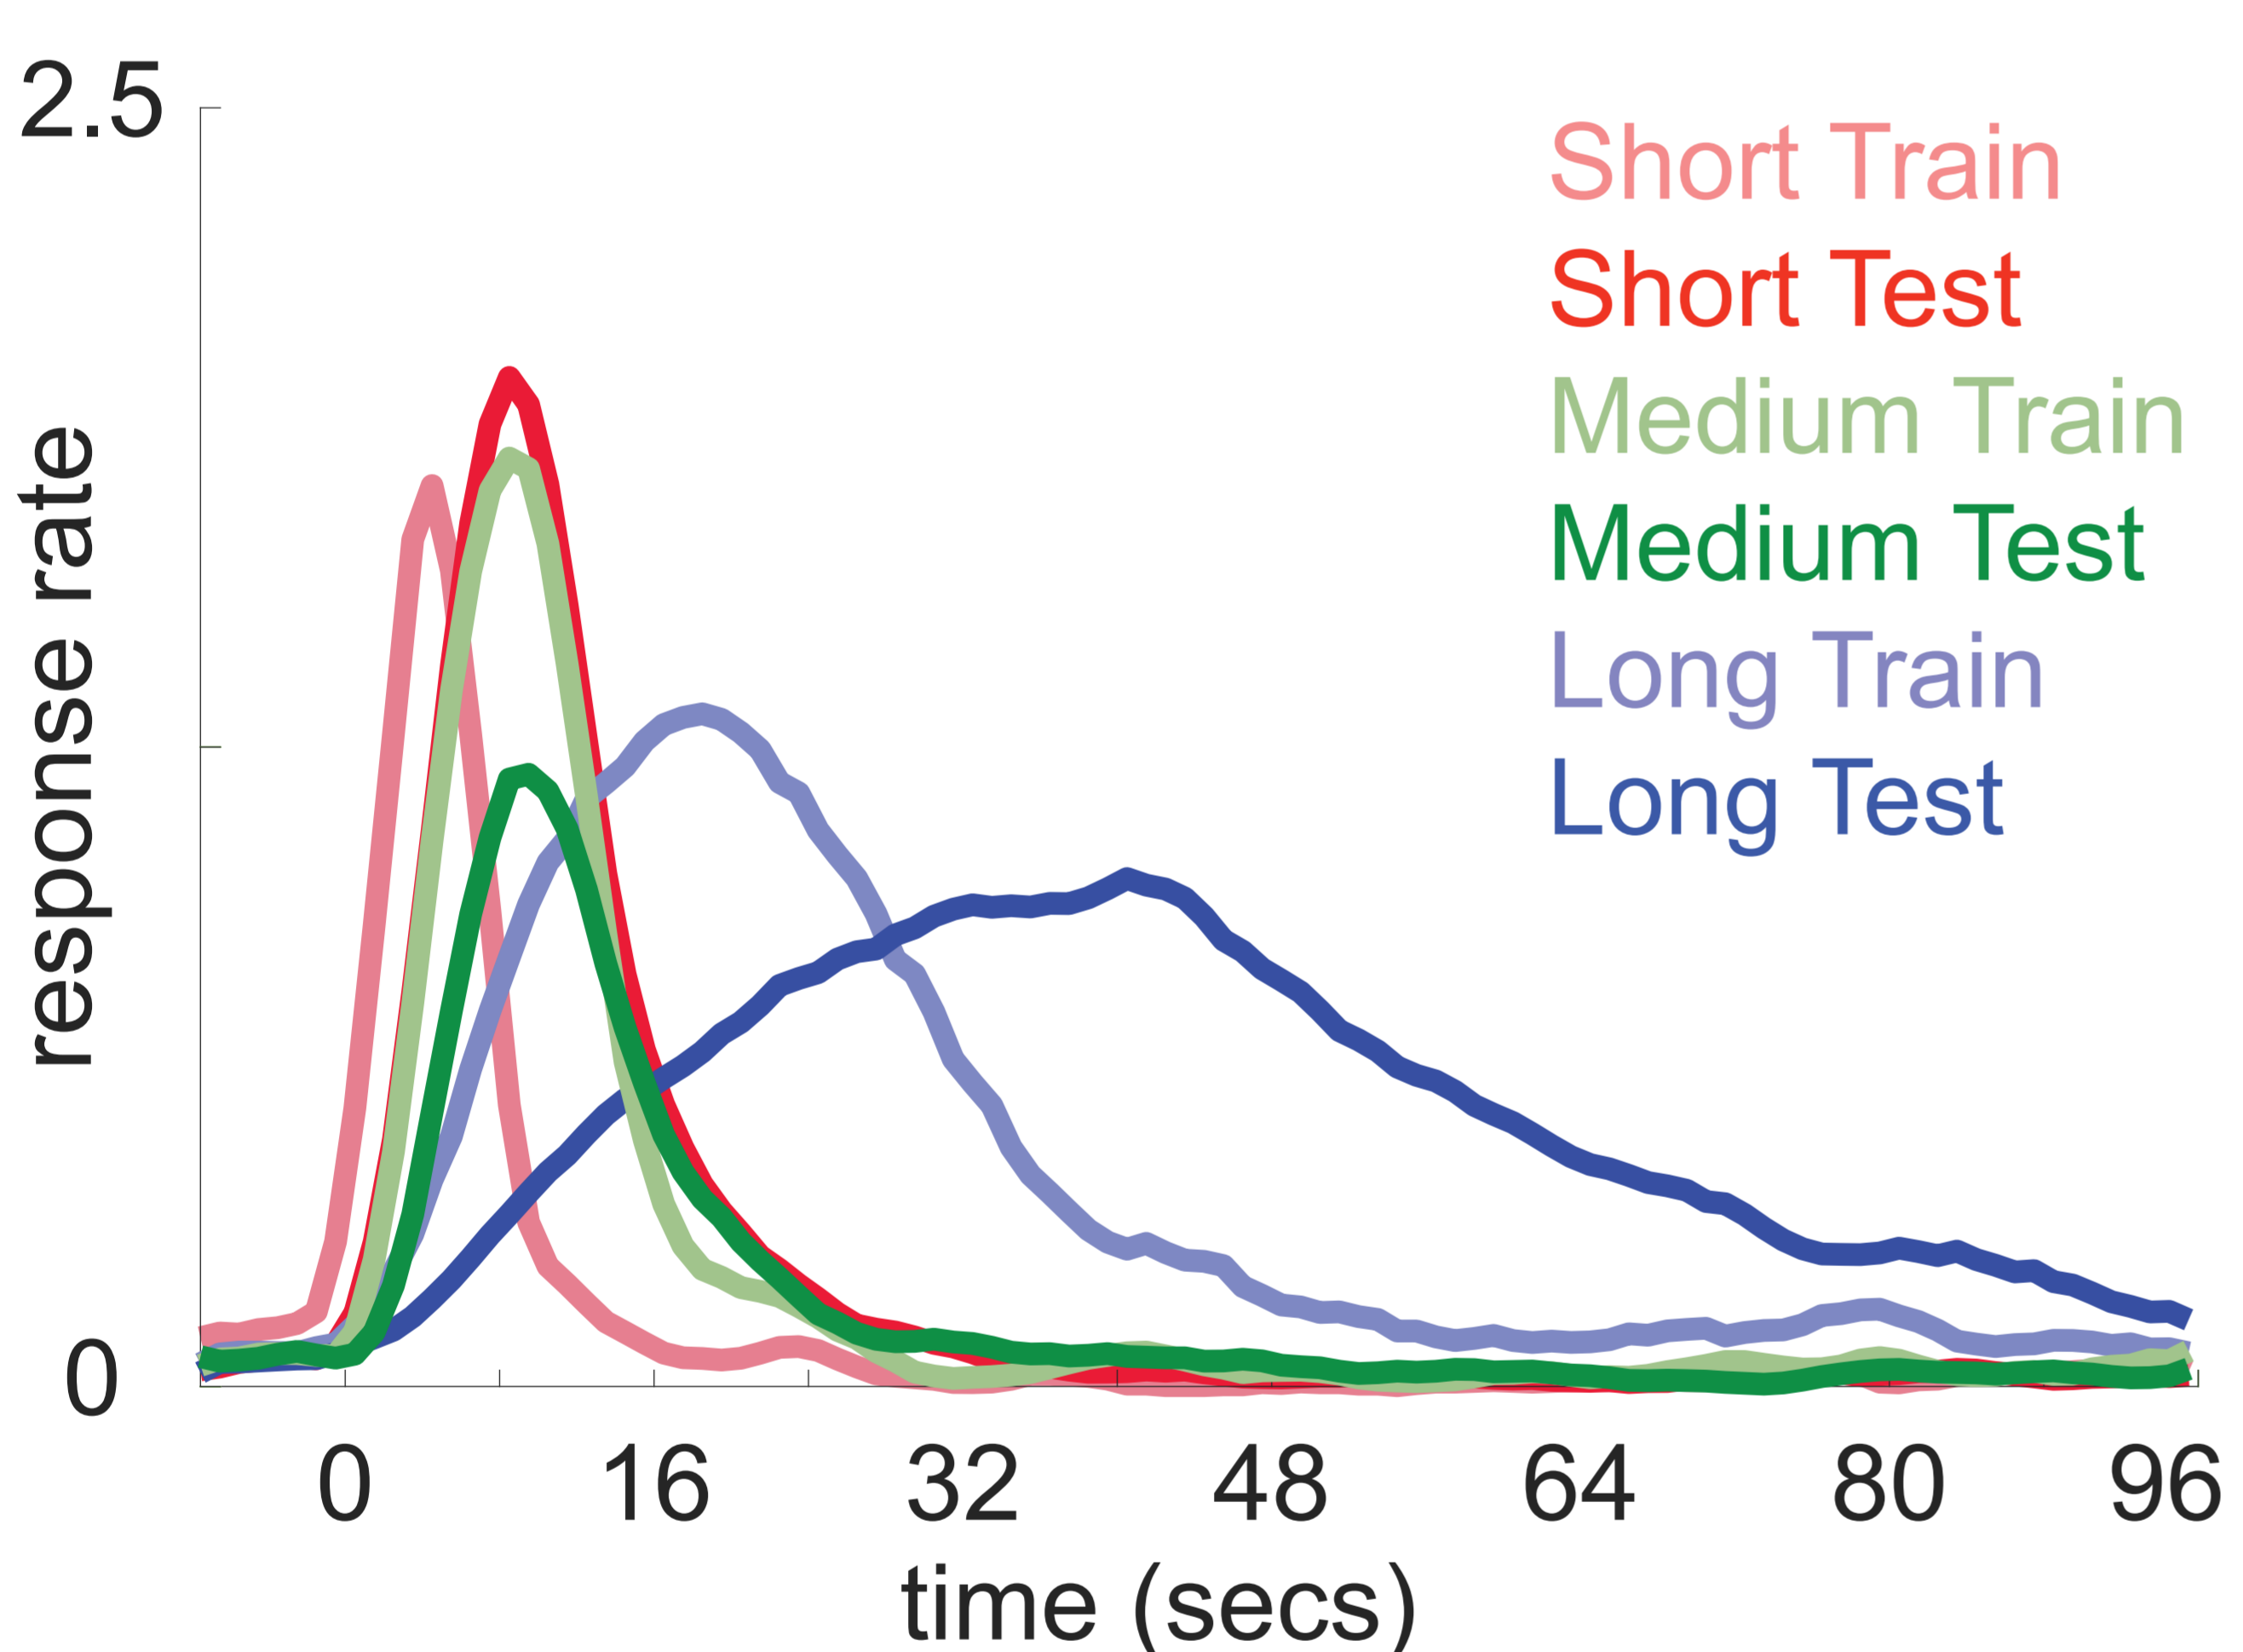

## Uncorrelated Group

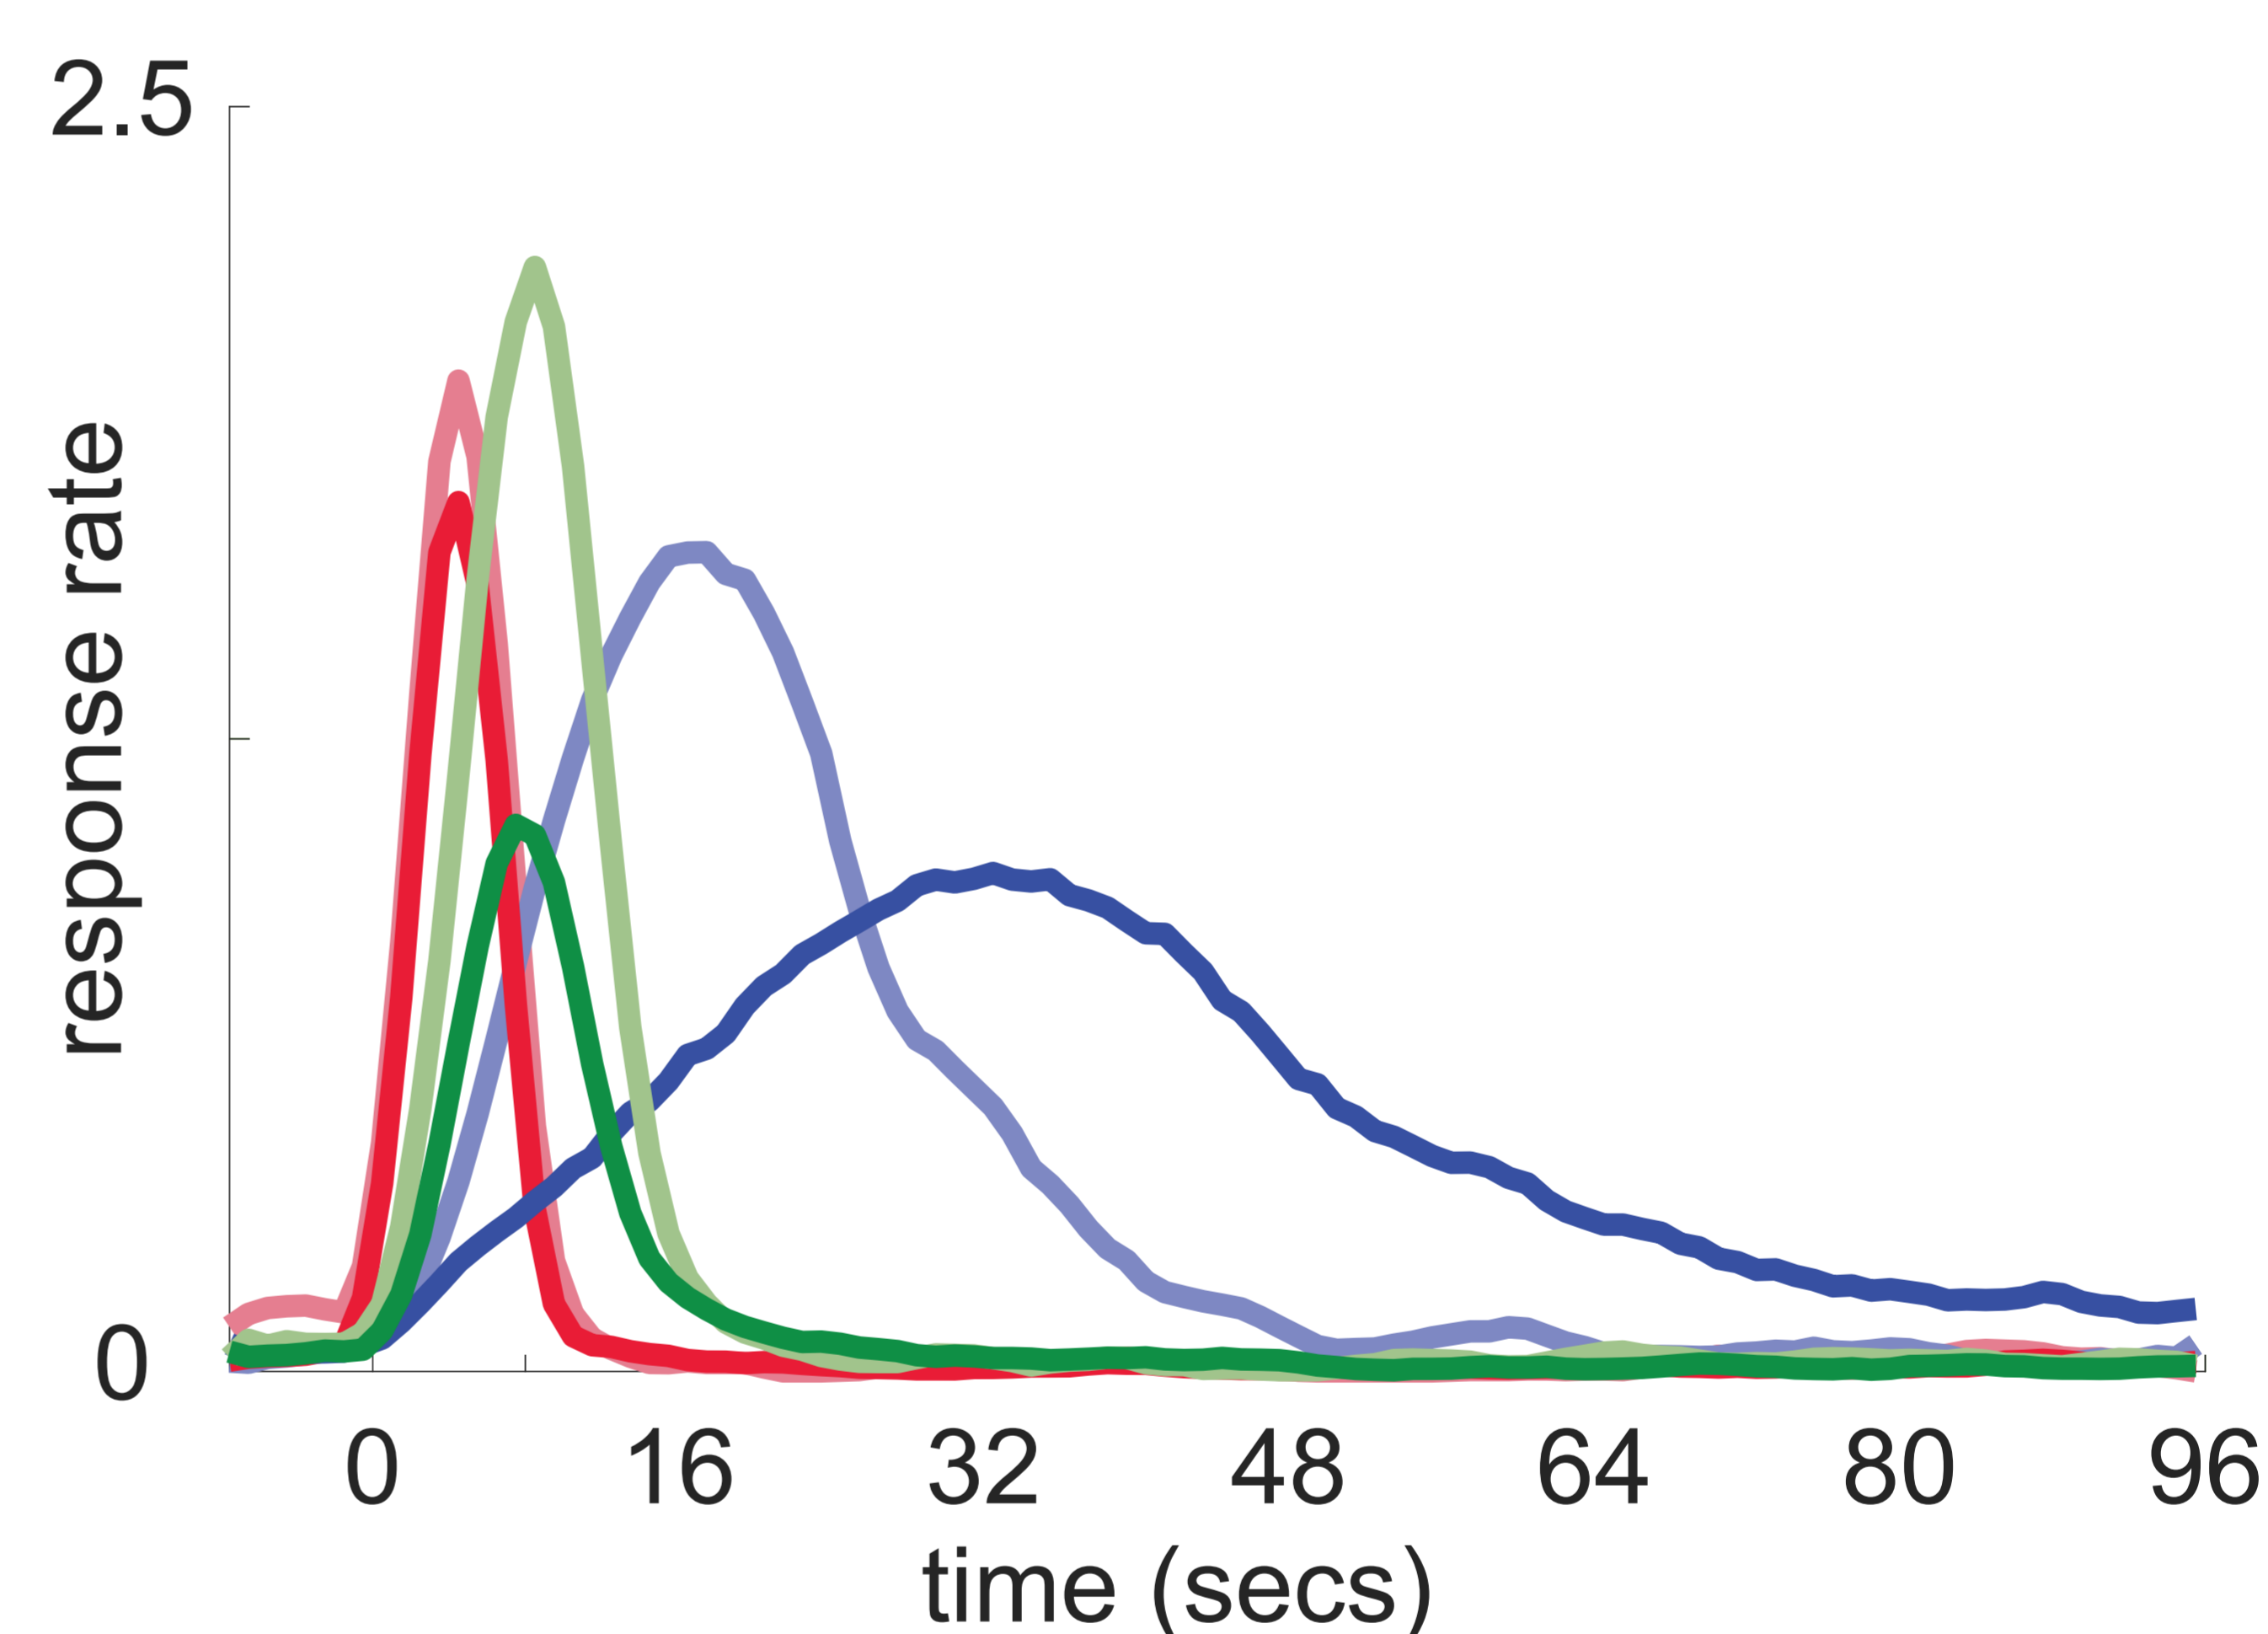

## F. Correlated Group

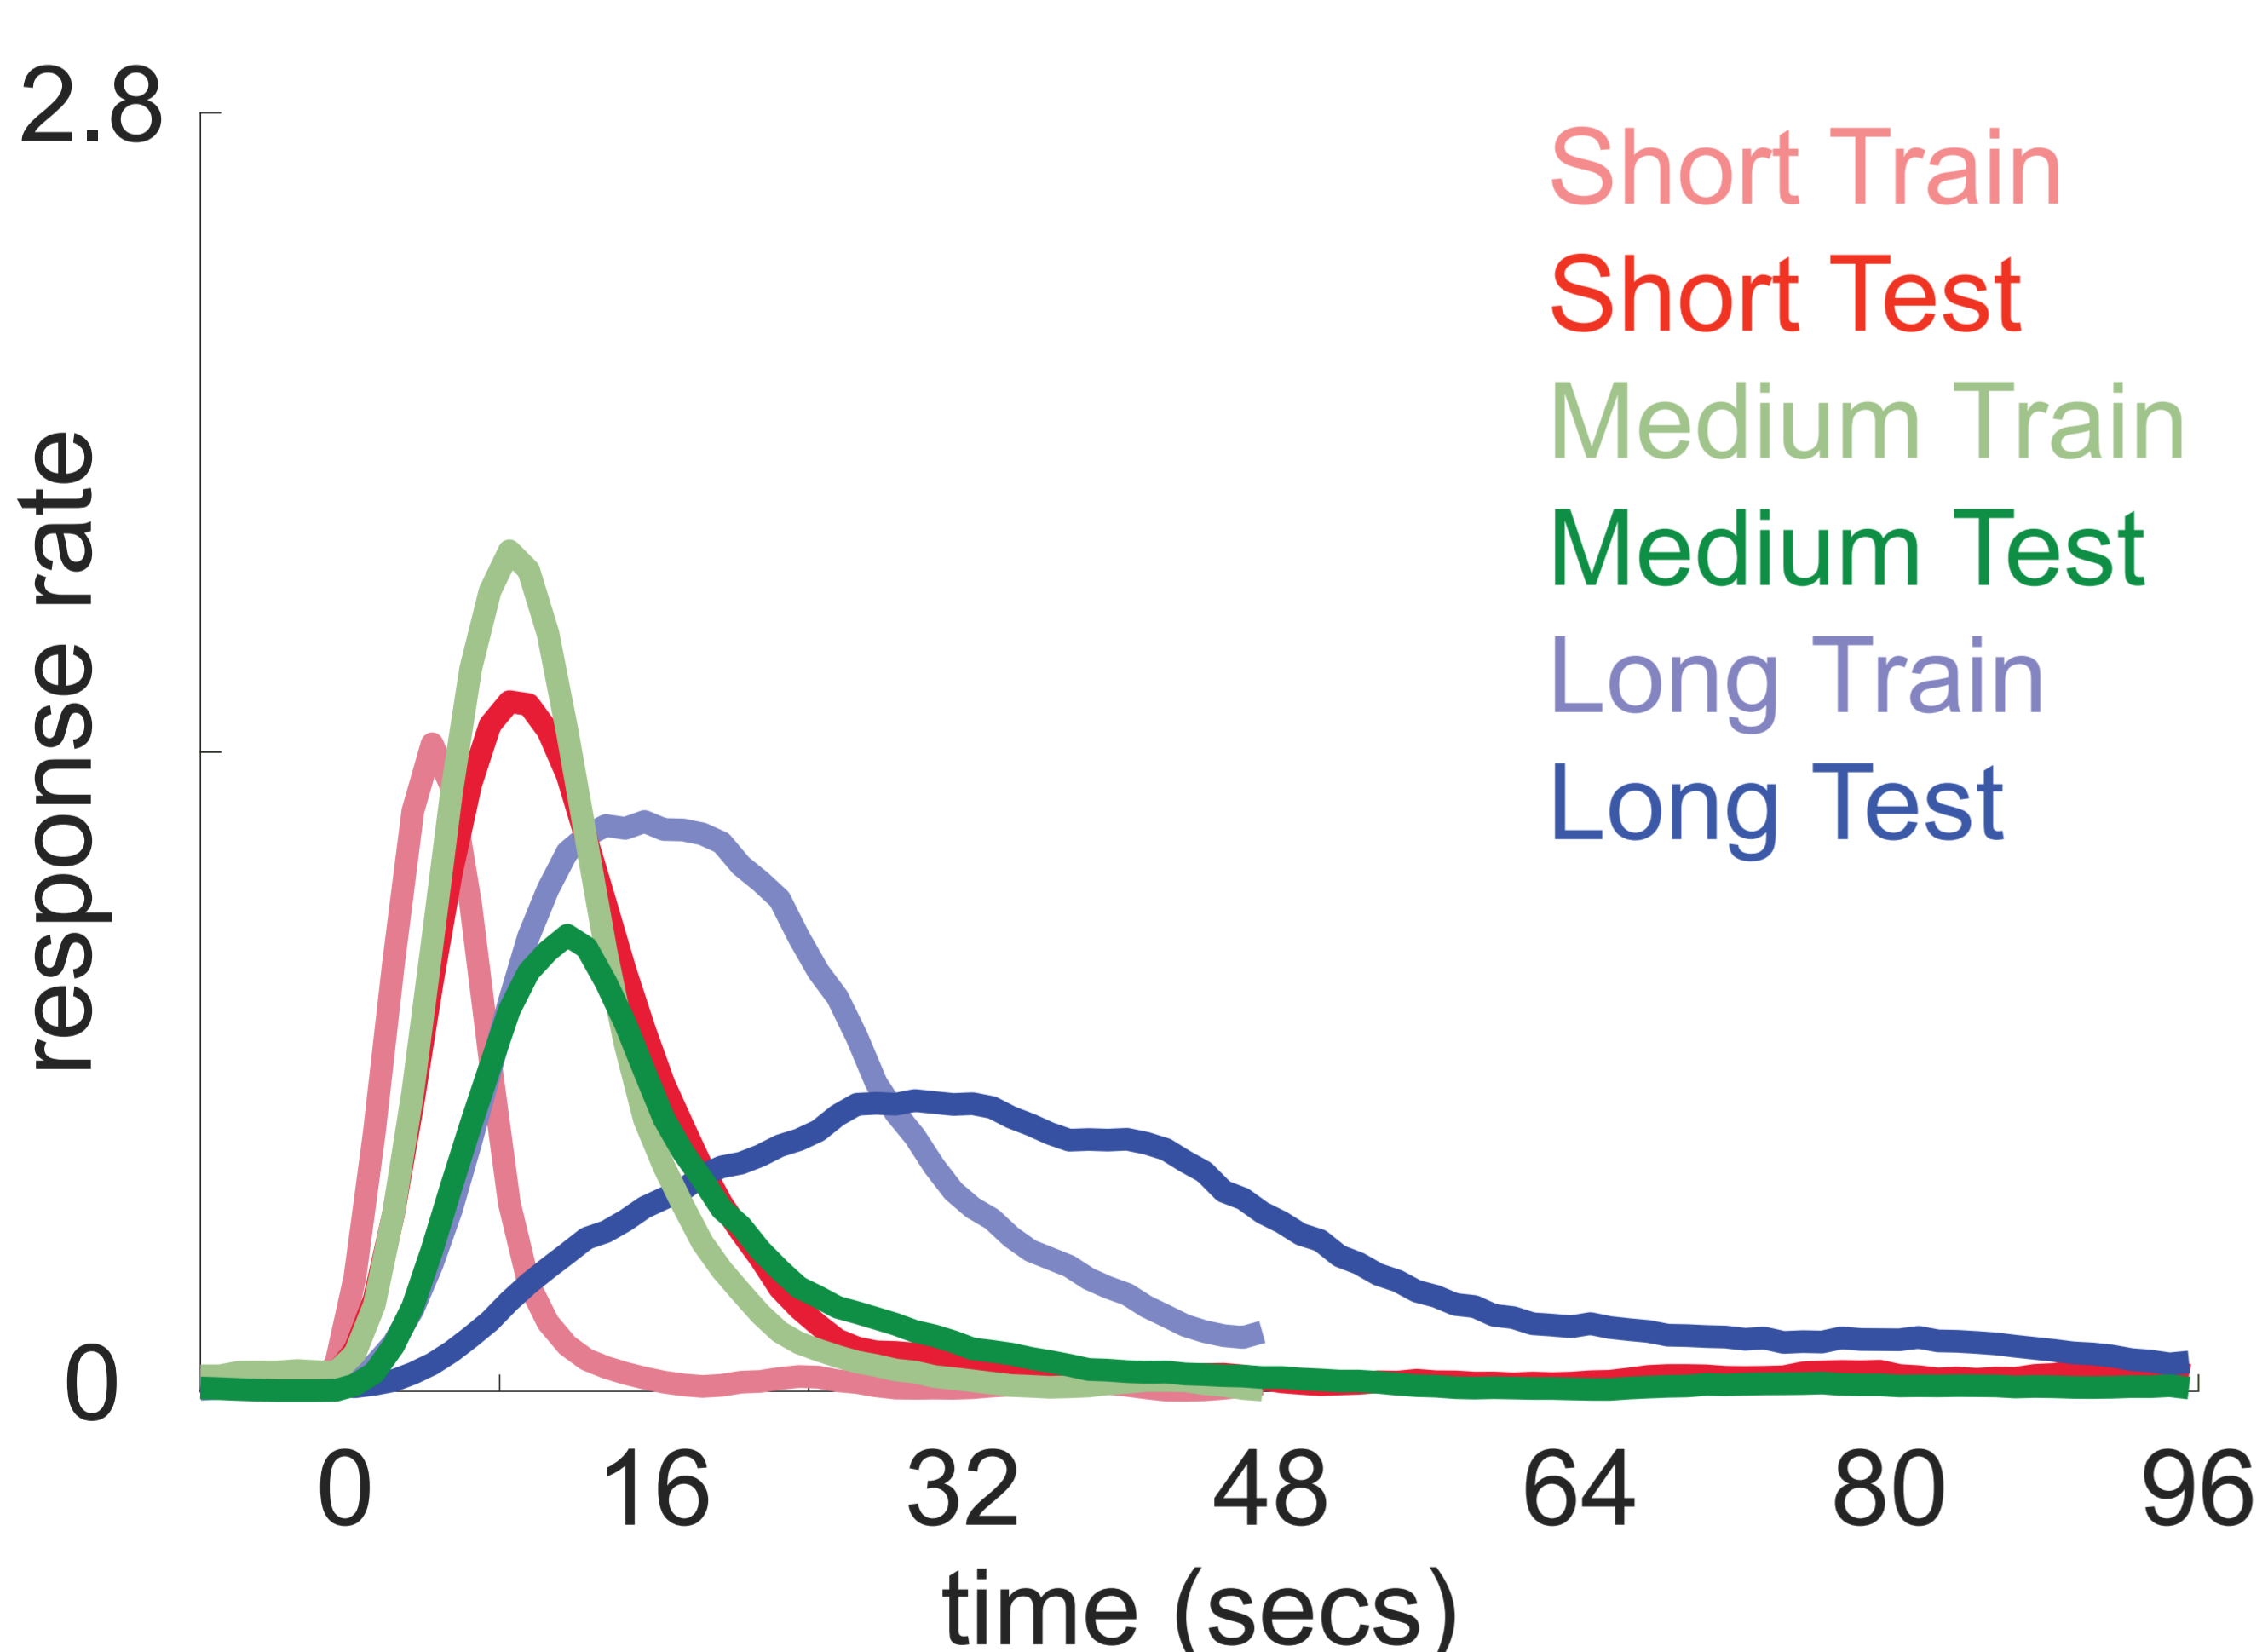

## Uncorrelated Group

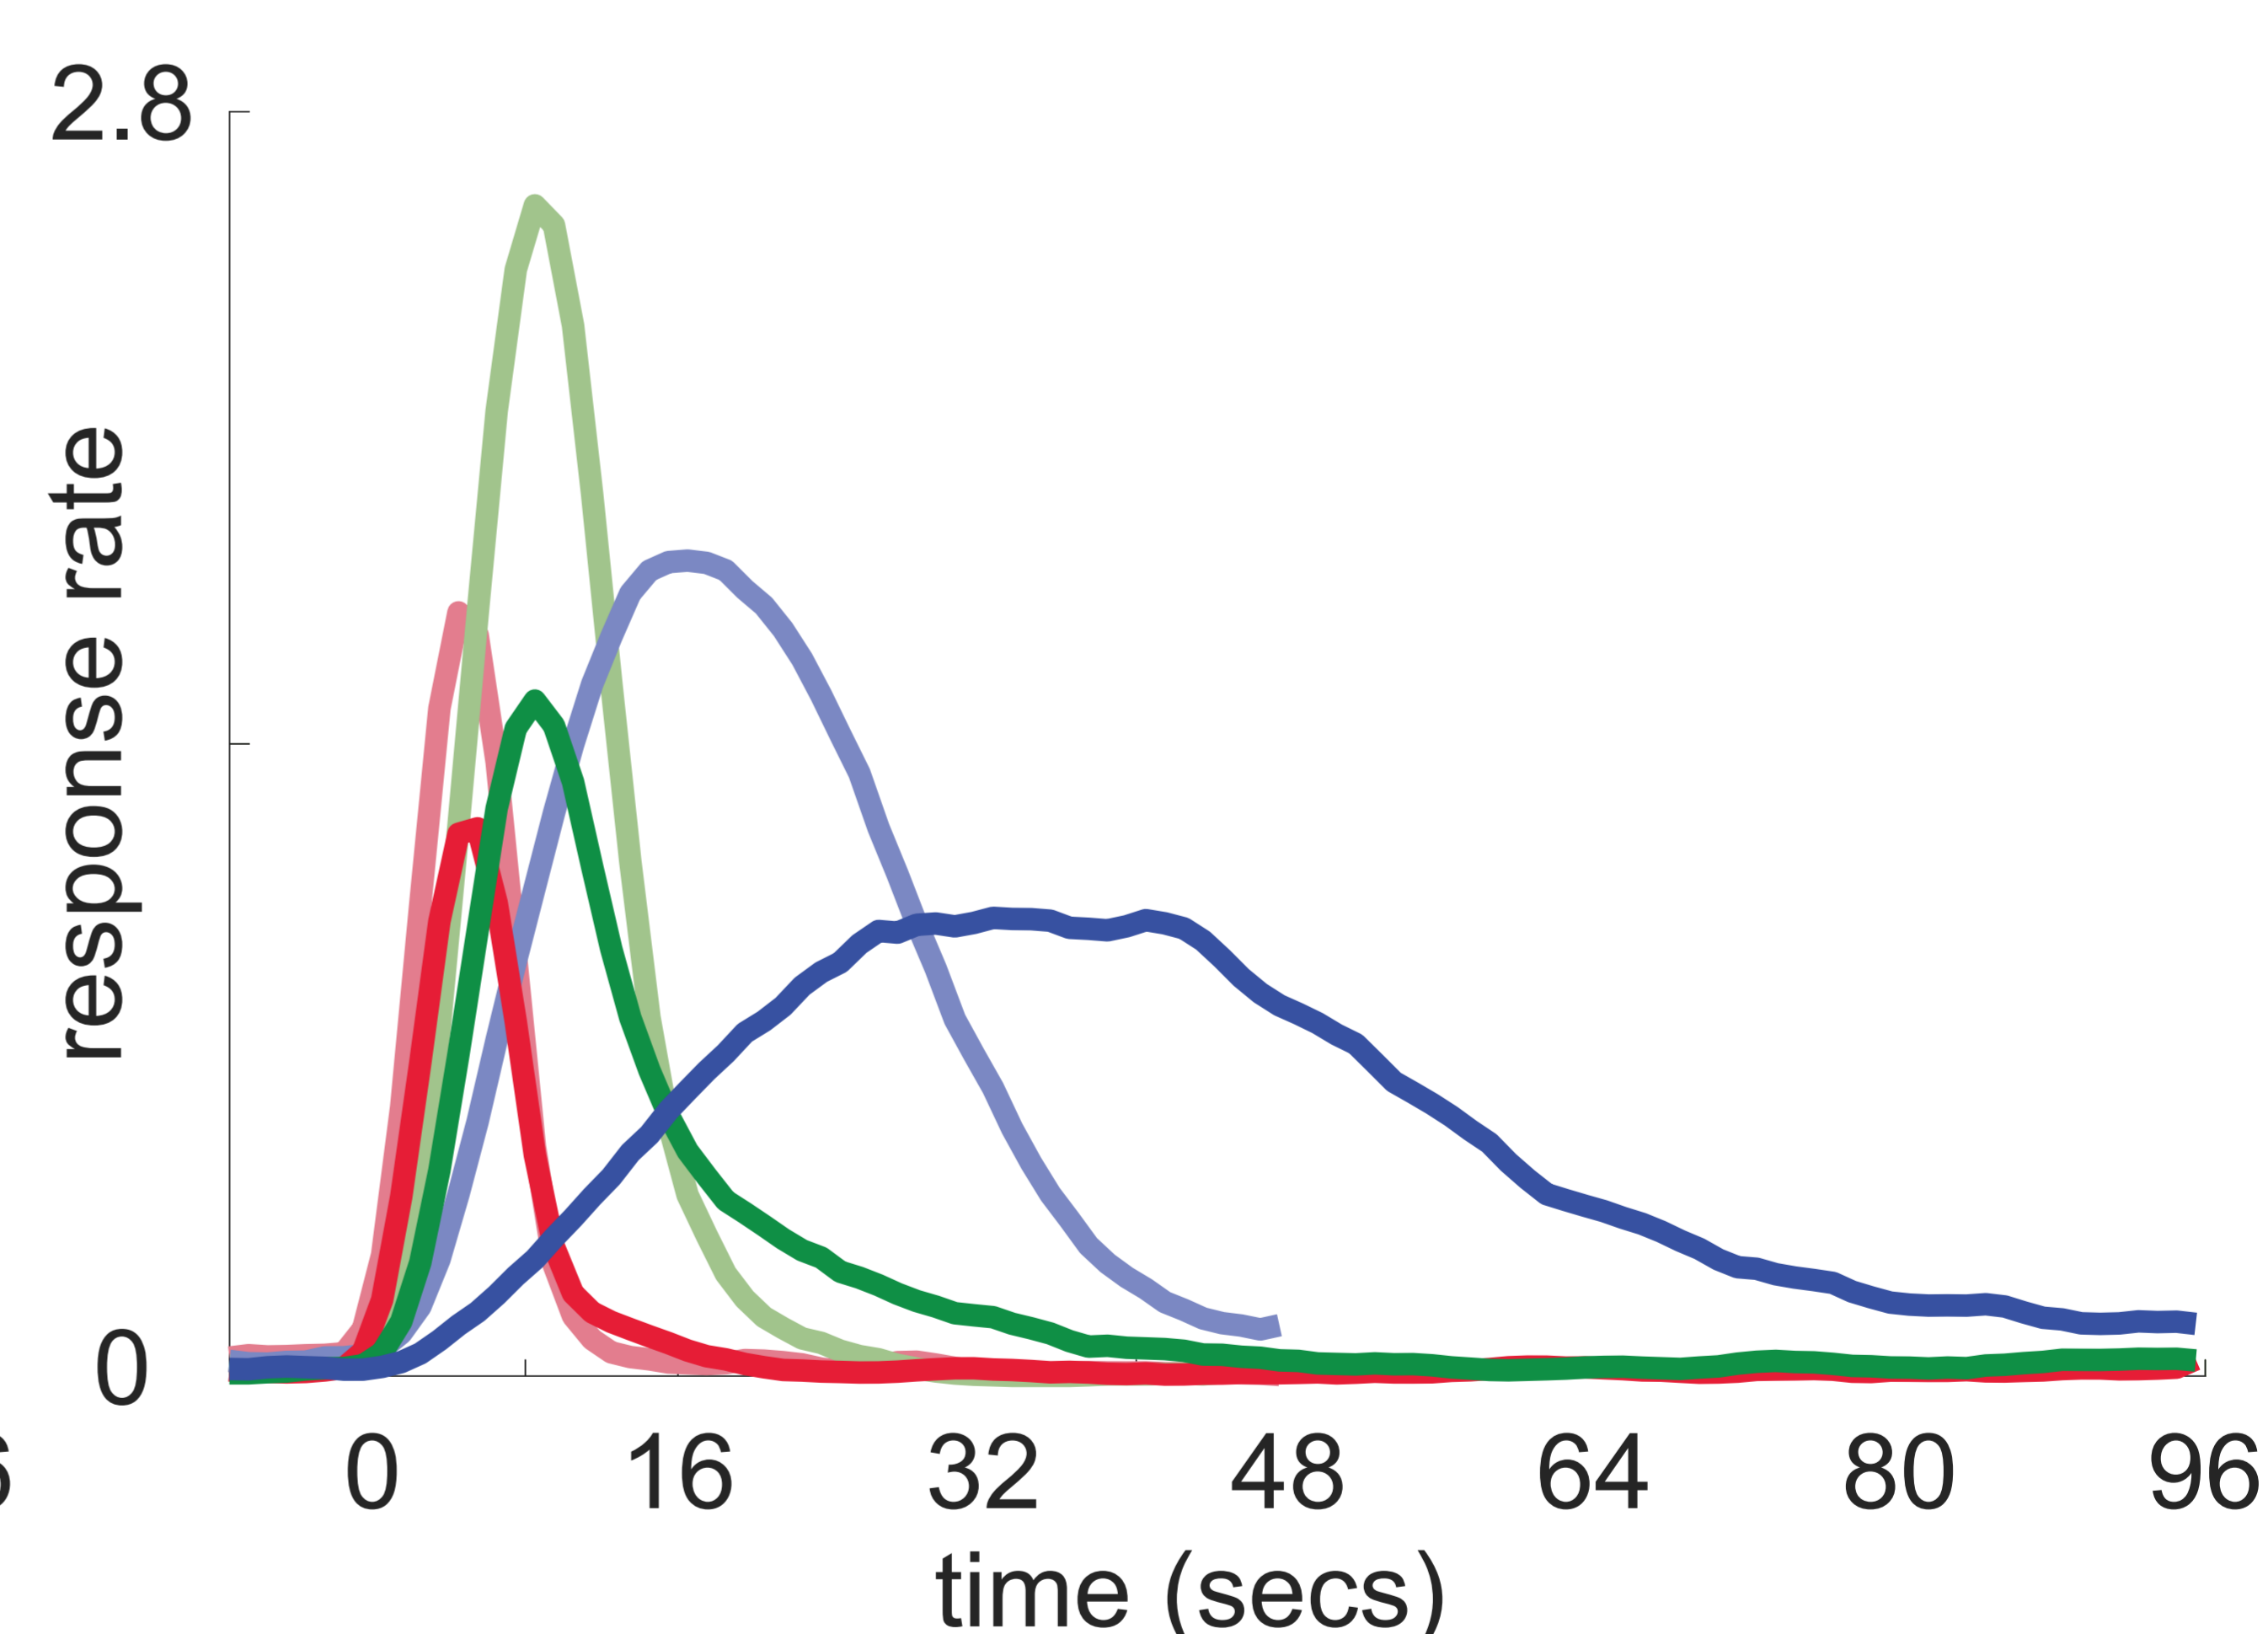

### G. No-change Context

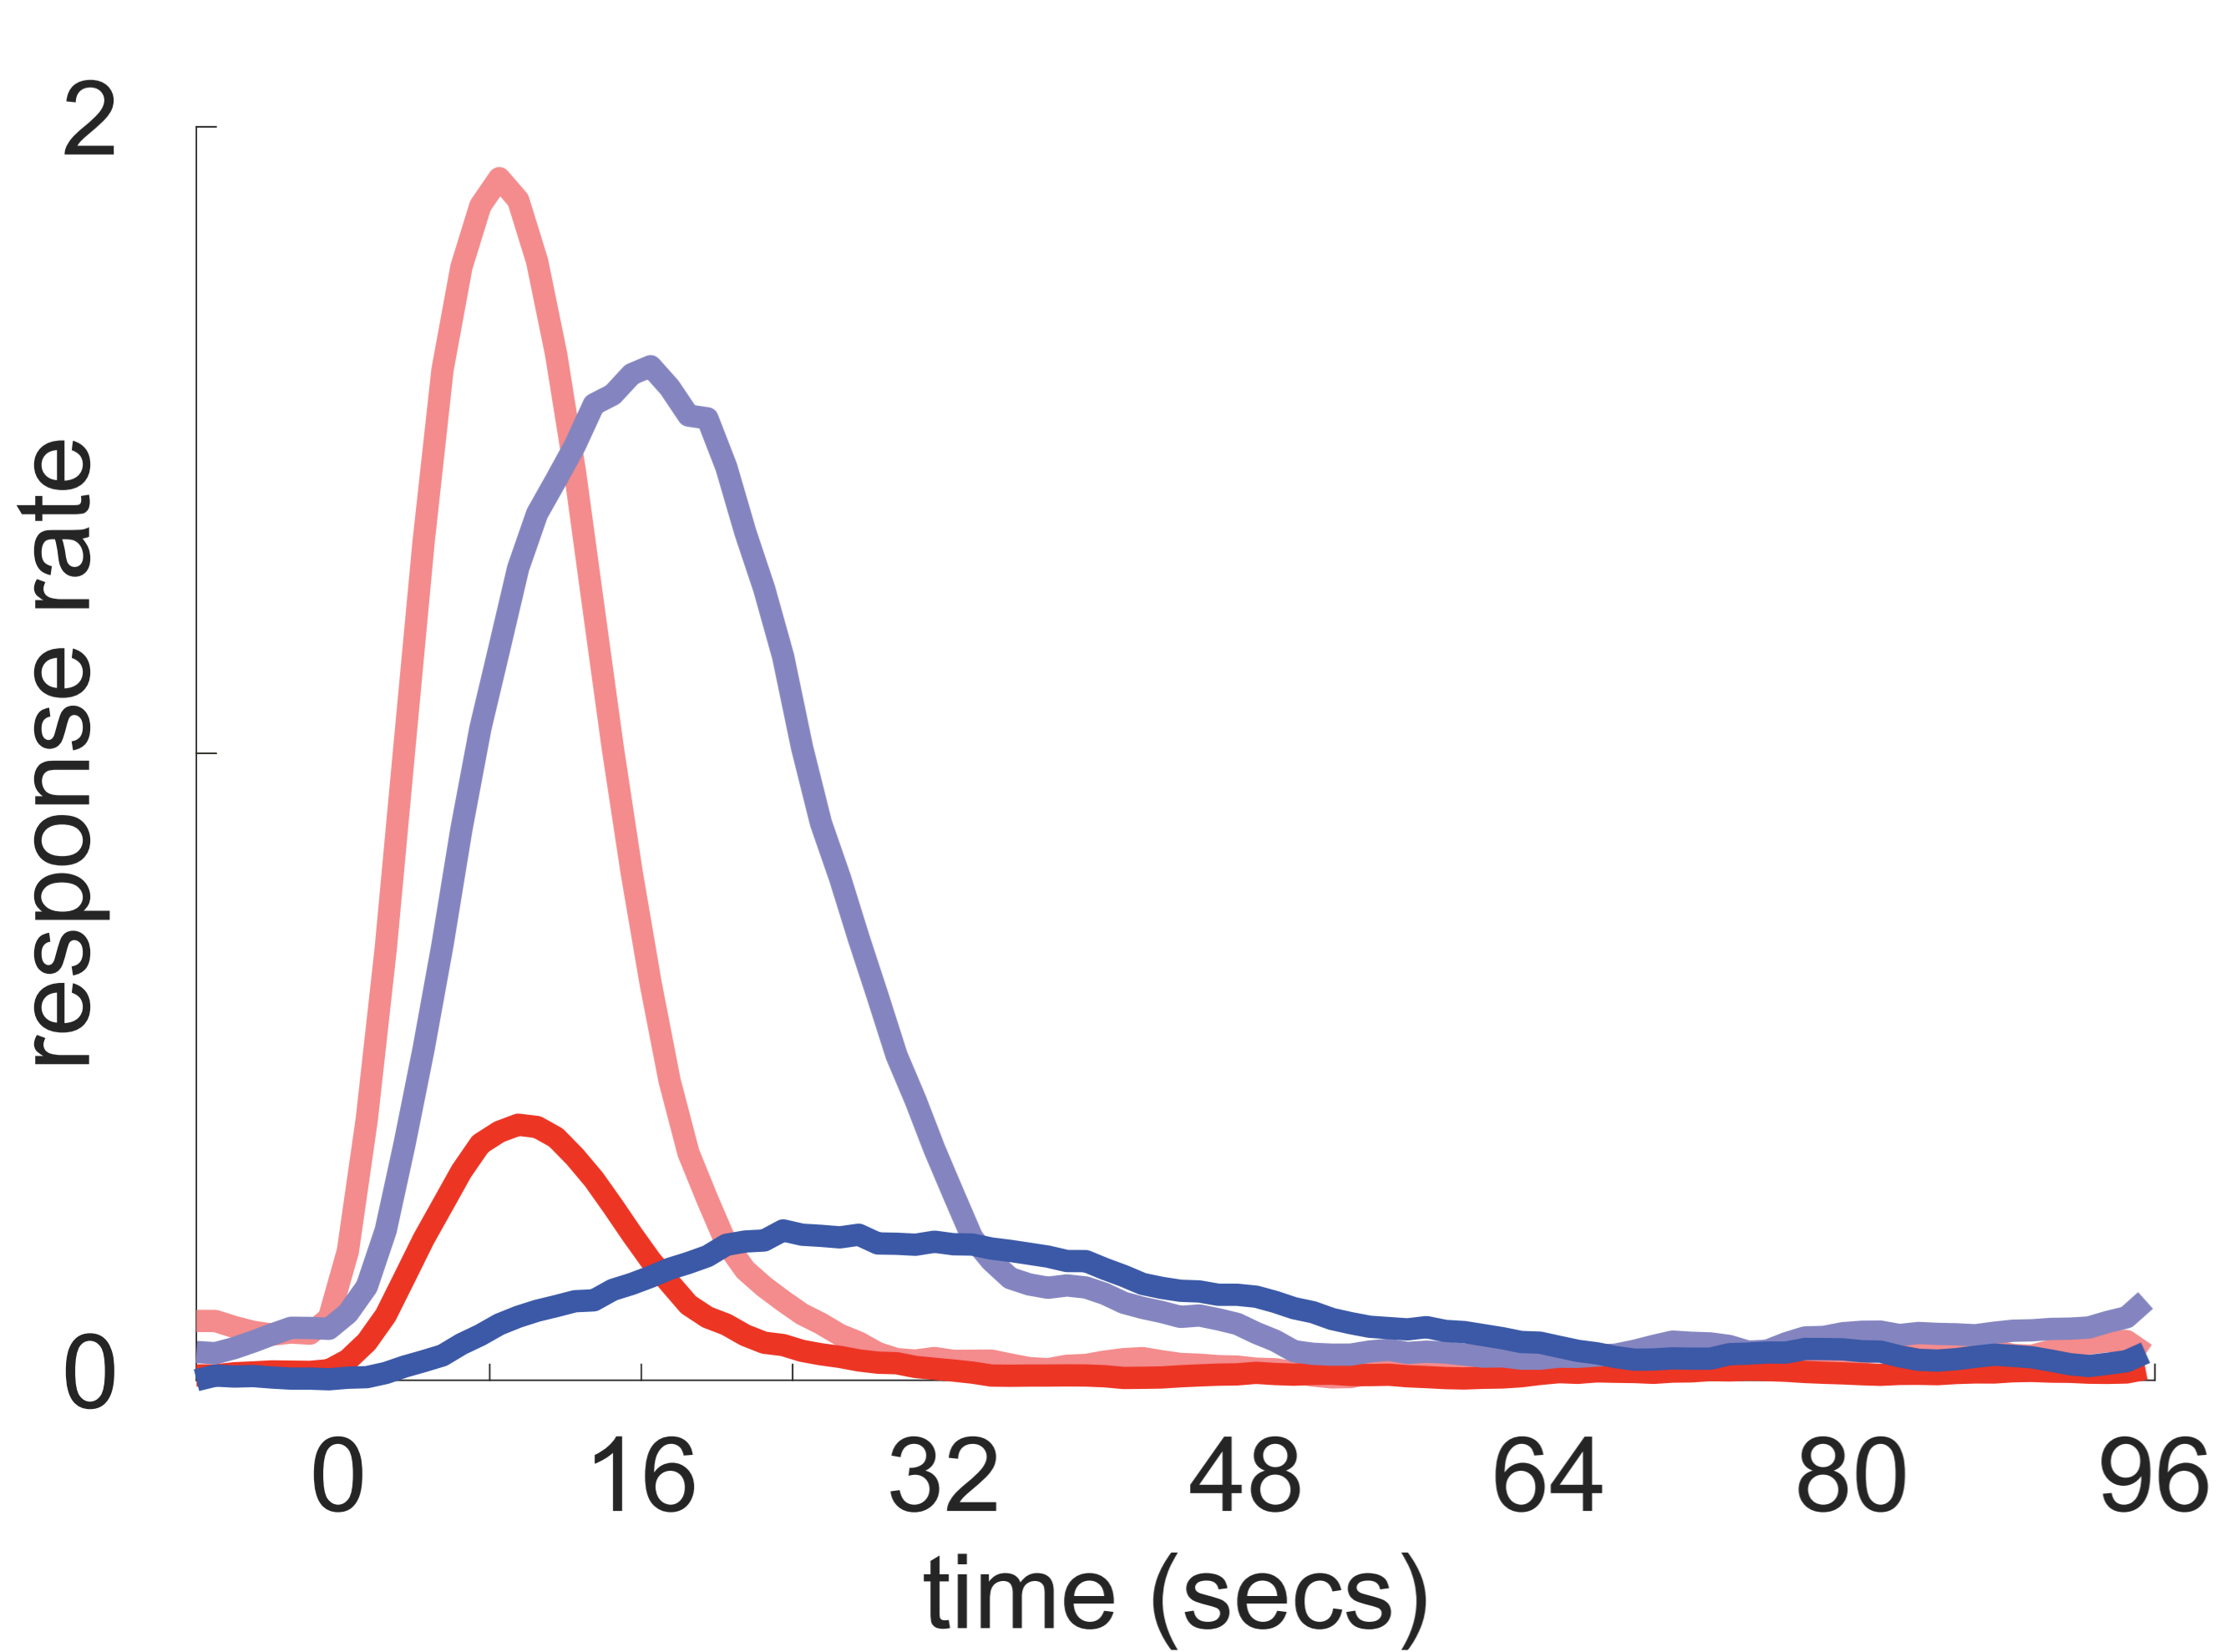

## Change Context

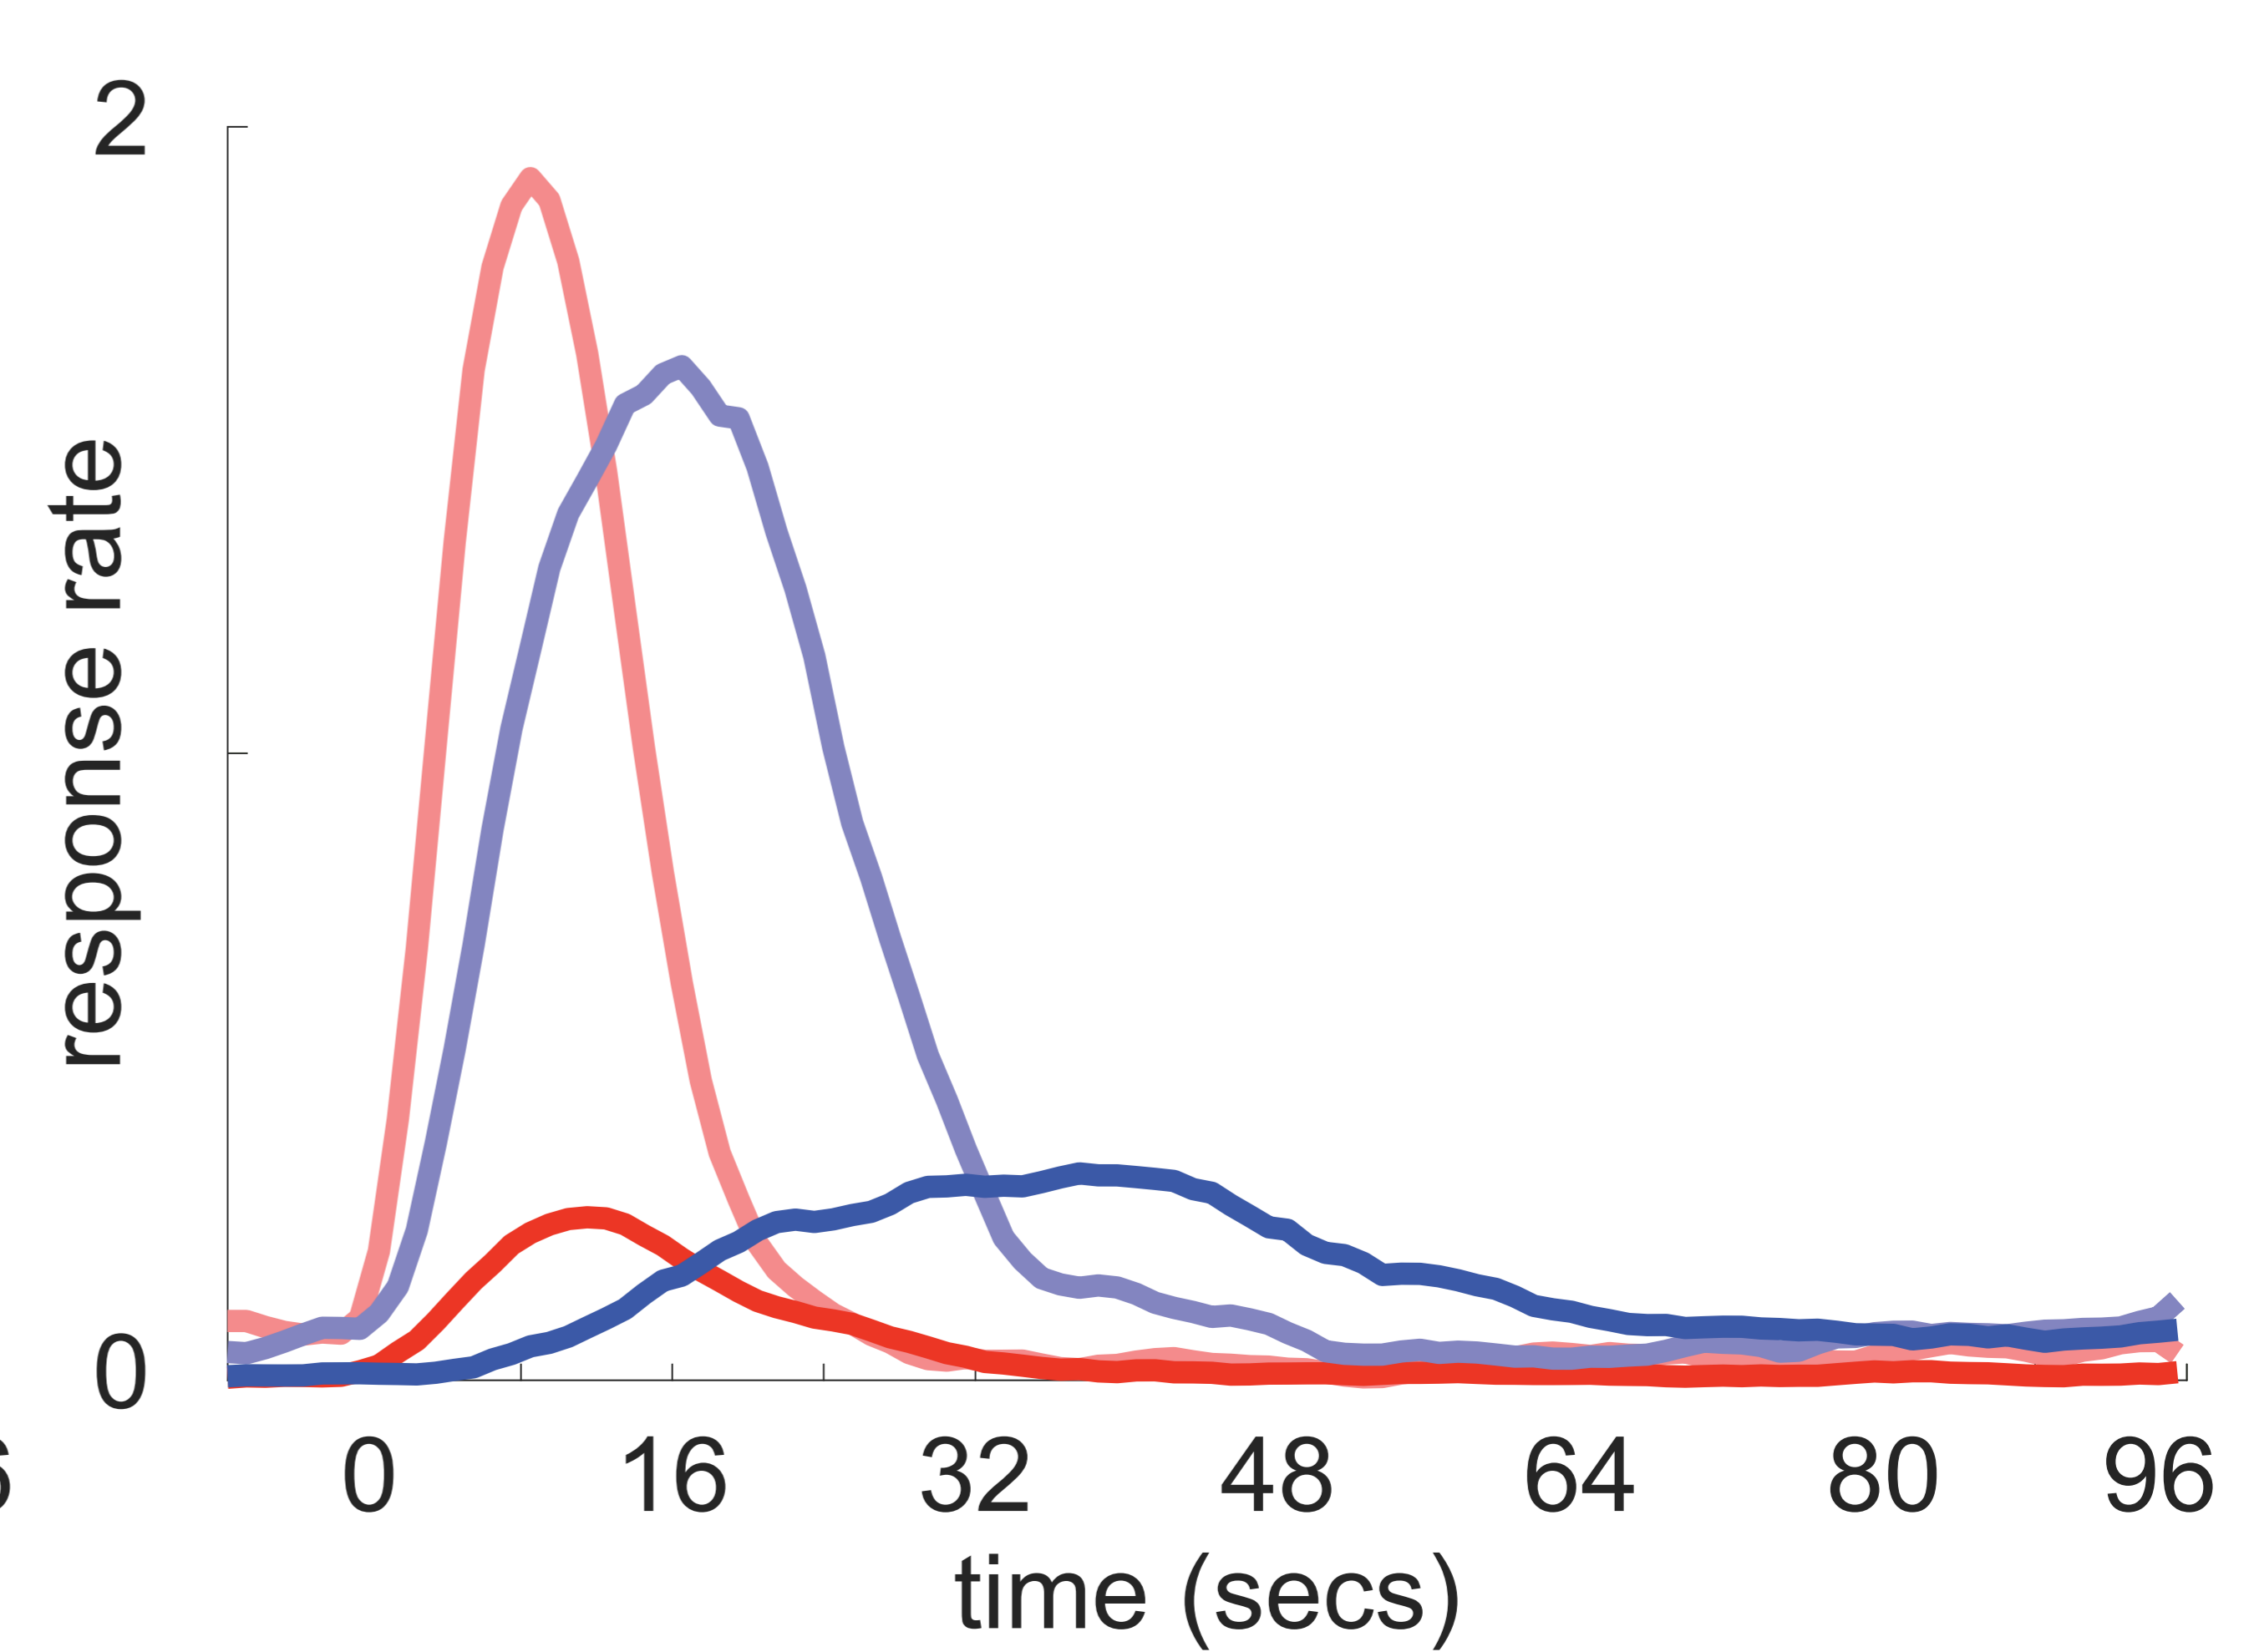

Supplement: supp [file elife-38790-supp-v1.zip › elife_poa_e38790_Figure_1_figure_supplement_1.pdf]
