# Supplementary material for: Recalibrating timing behavior via expected covariance between temporal cues
Source: eLife journal article supplement (doi:10.7554/elife.38790), 2018-11-02

**A.**

**8-to-4  
Group**

Train

Change

Test

Short  
(changed)

8s

4s

4s

Long  
(unchanged)

16s

?

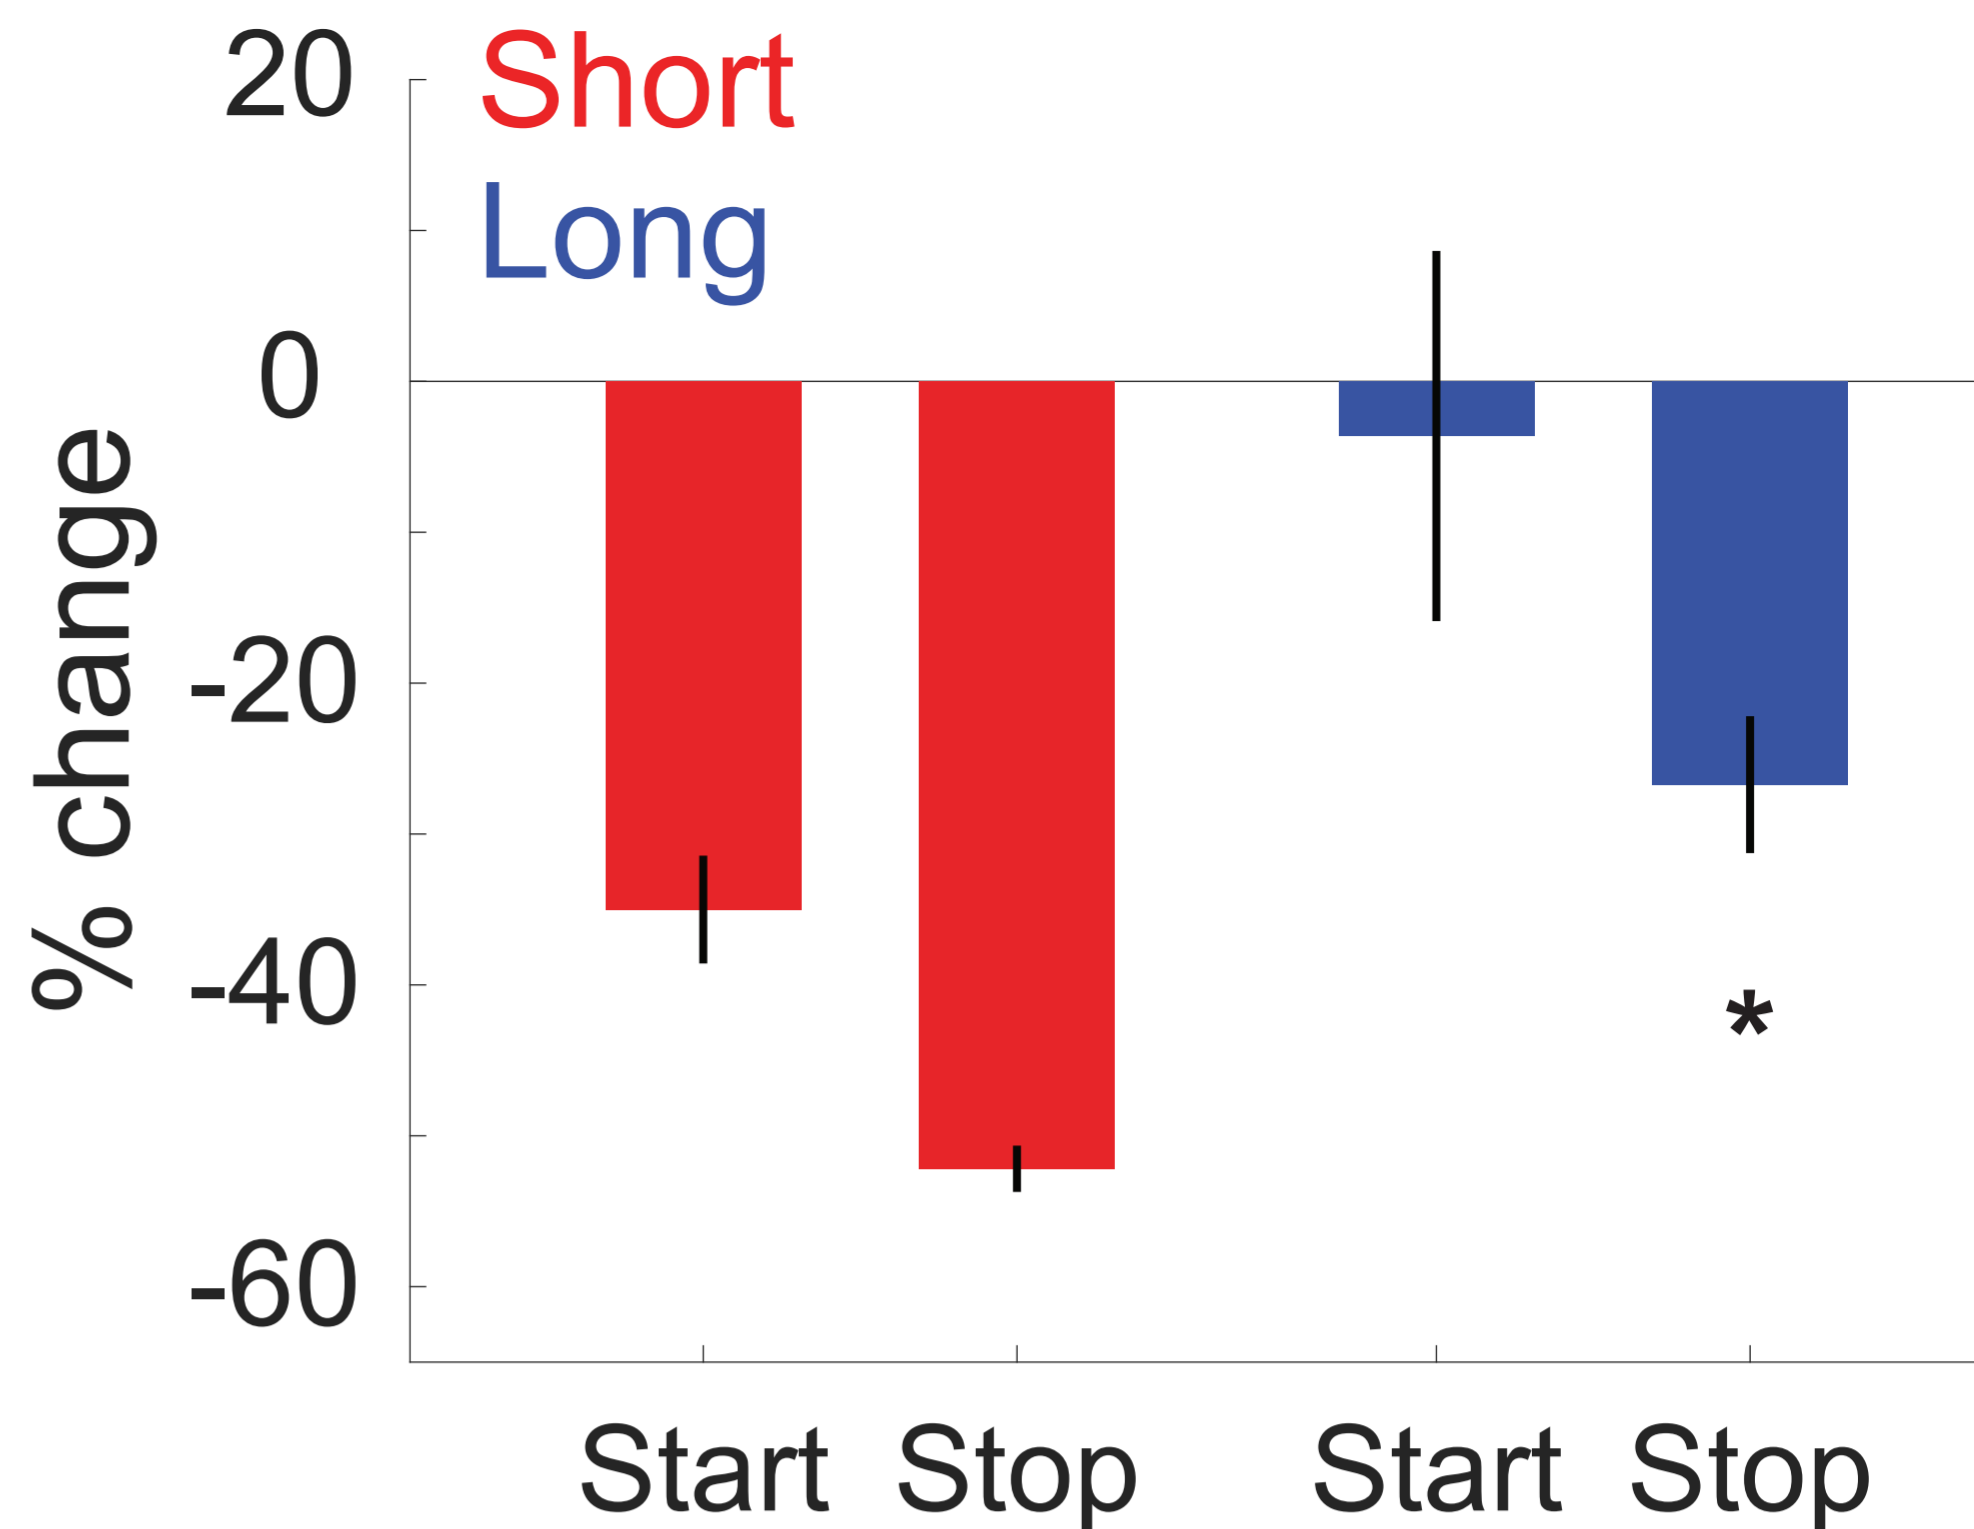

**B.**

**16-to-32  
Group**

Train

Change

Test

Short  
(unchanged)

8s

?

Long  
(changed)

16s

32s

32s

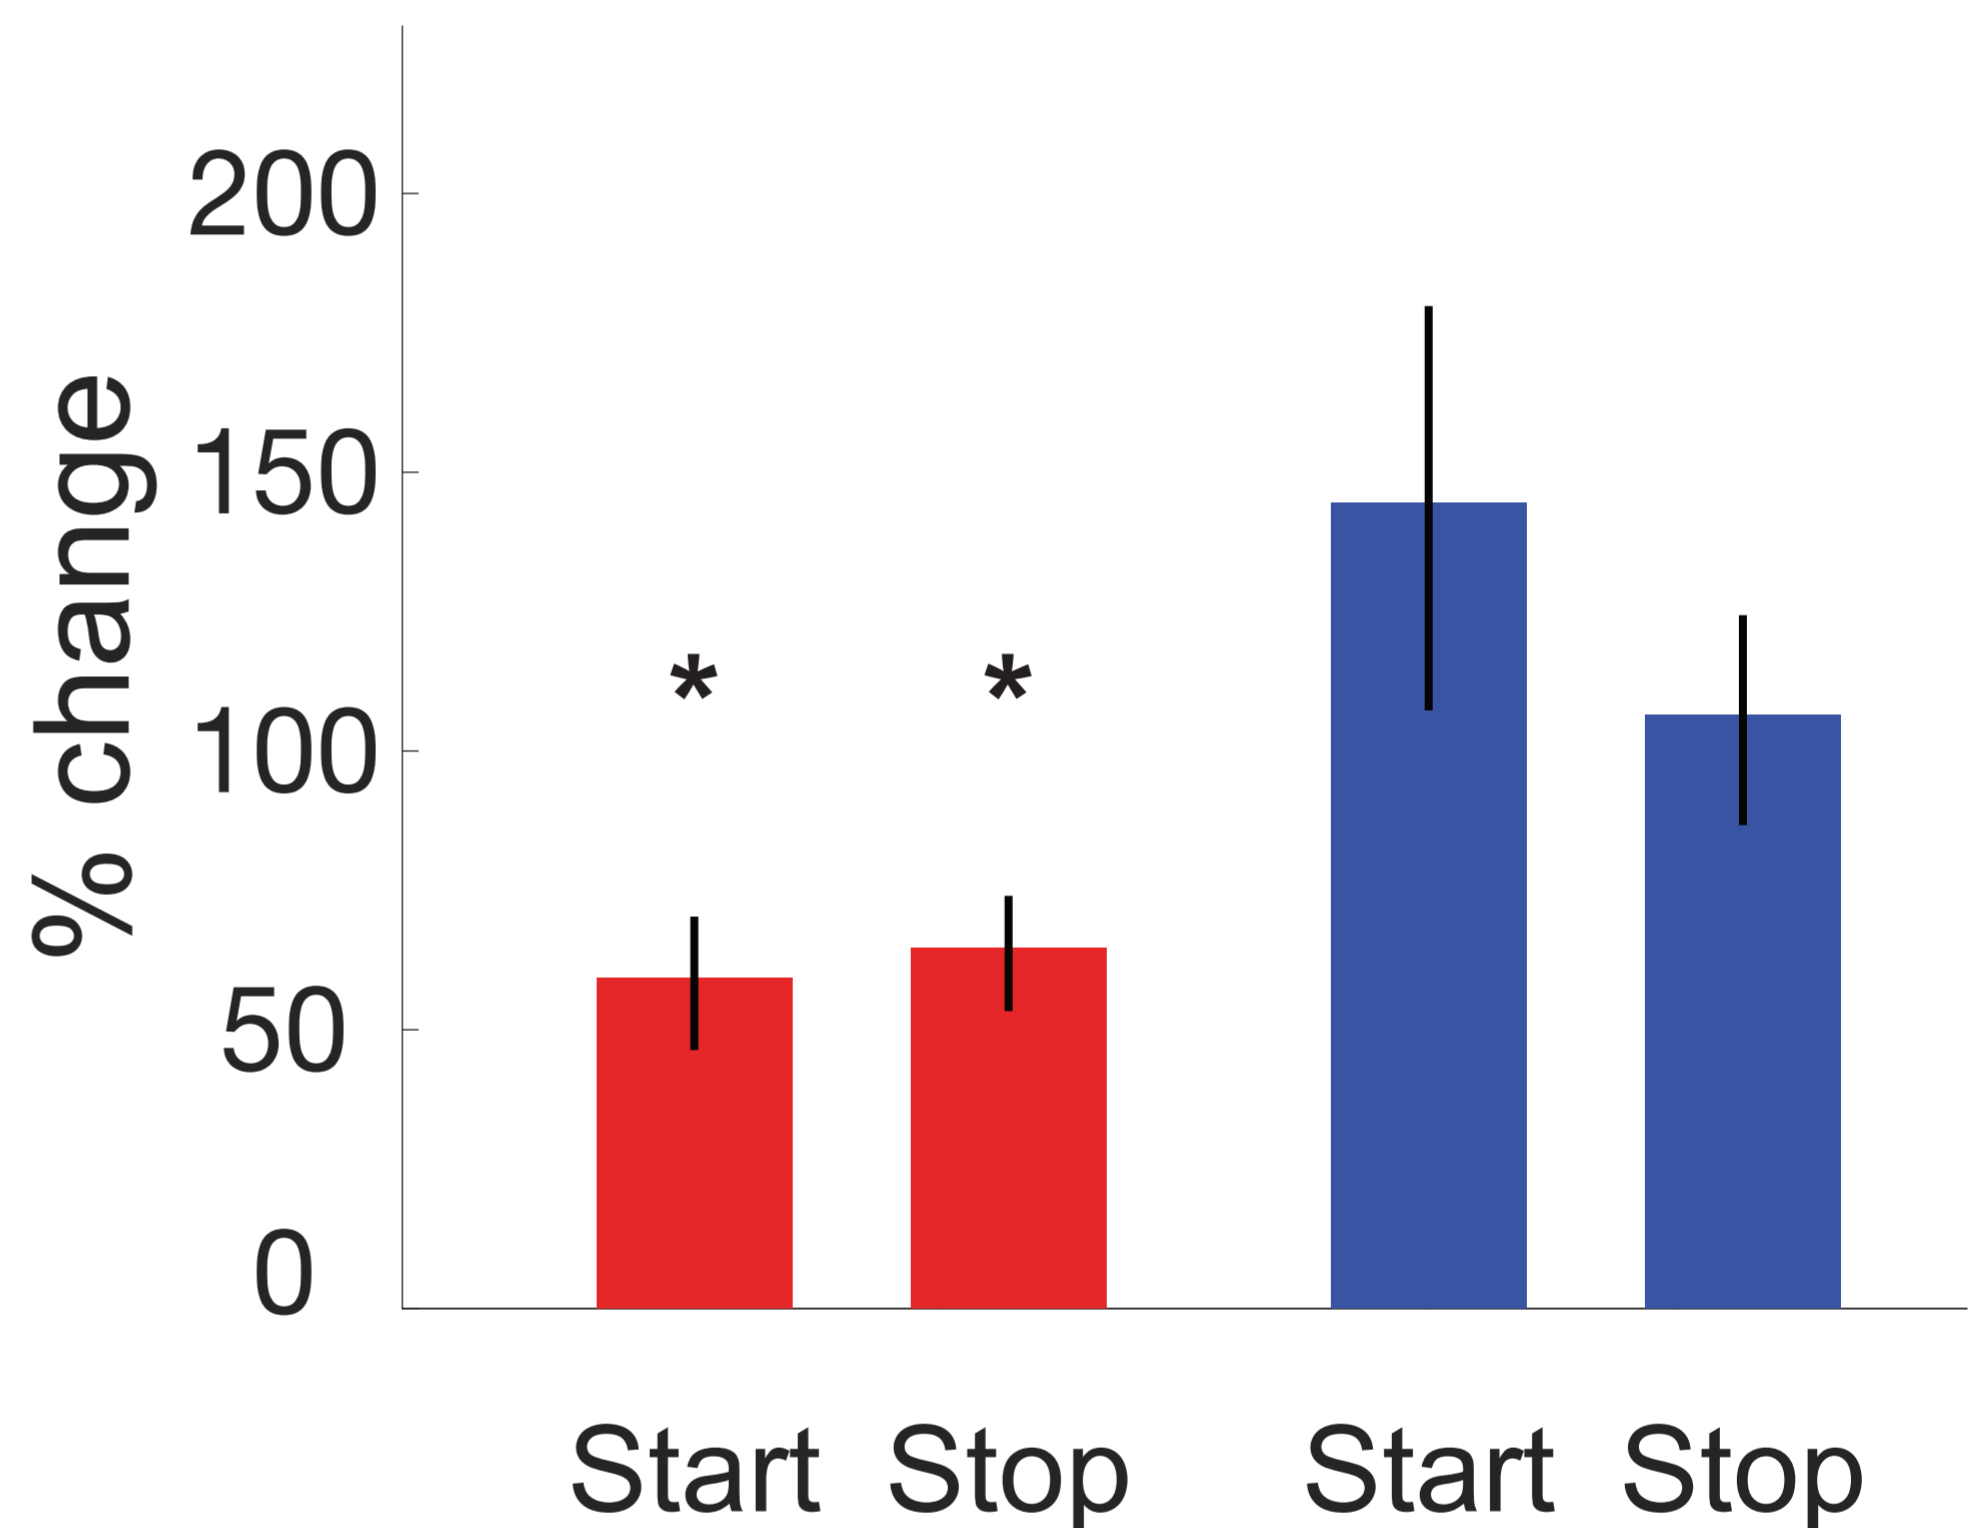

**C.**

**8-to-8  
Group**

Train

Expose

Test

Short  
(exposed)

8s

8s

8s

Long  
(unexposed)

16s

?

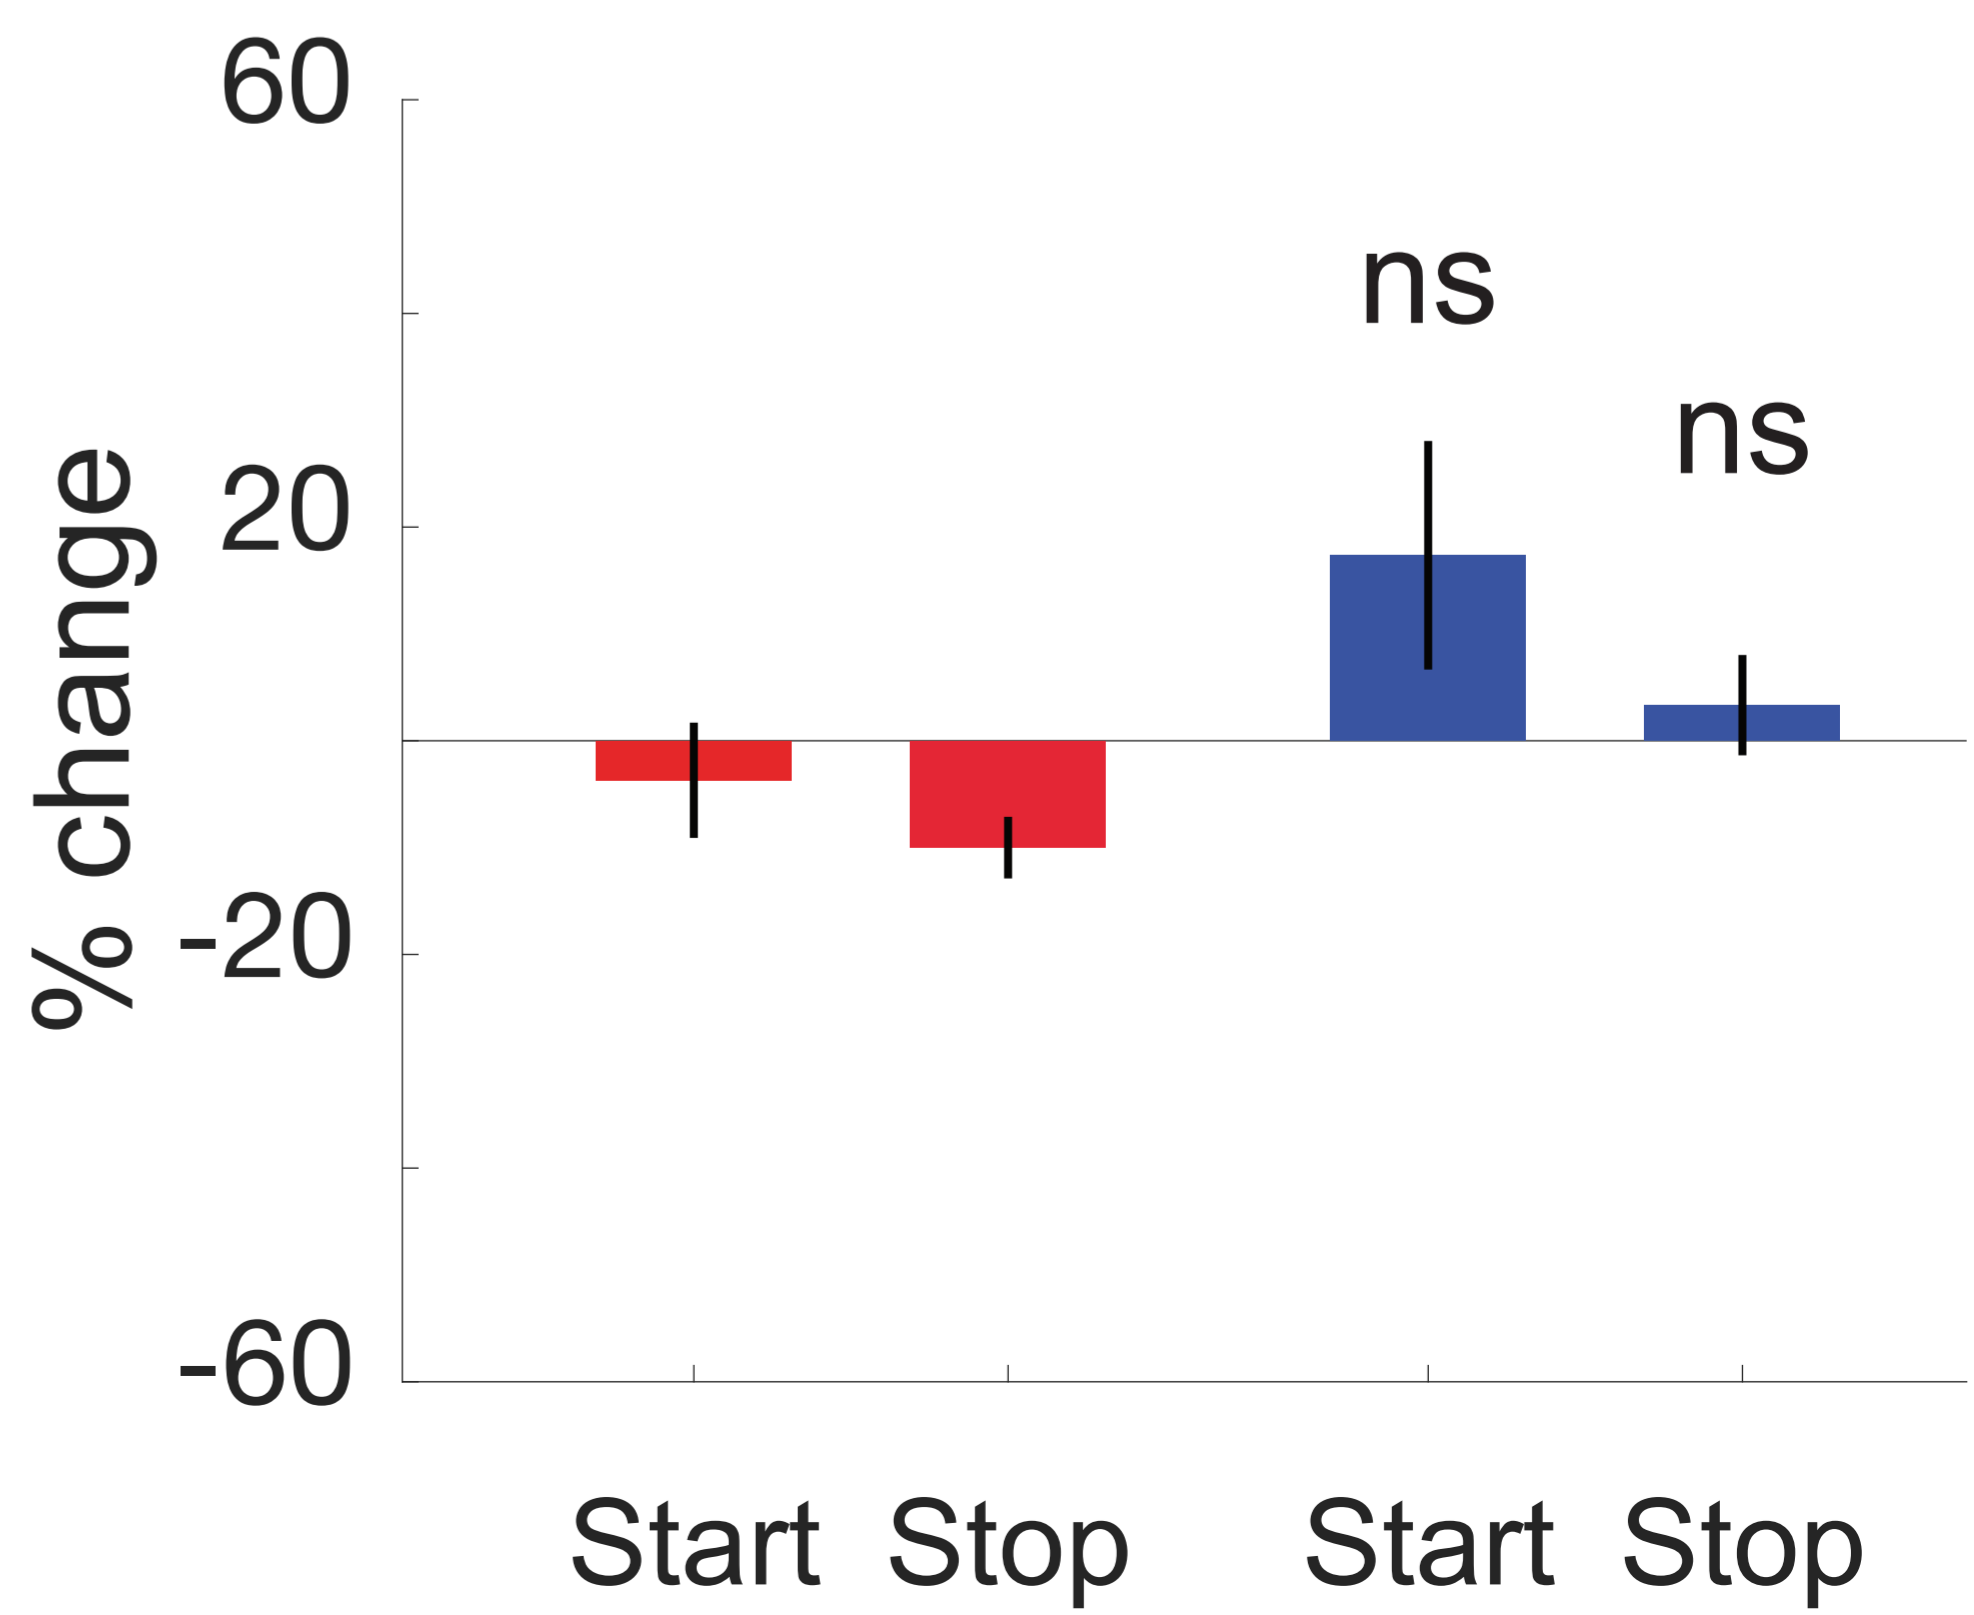

Supplement: supp [file elife-38790-supp-v1.zip › elife_poa_e38790_Figure_1_figure_supplement_2.pdf]
