# Supplementary figures and images for: Recalibrating timing behavior via expected covariance between temporal cues
Source: eLife journal article supplement (doi:10.7554/elife.38790), 2018-11-02

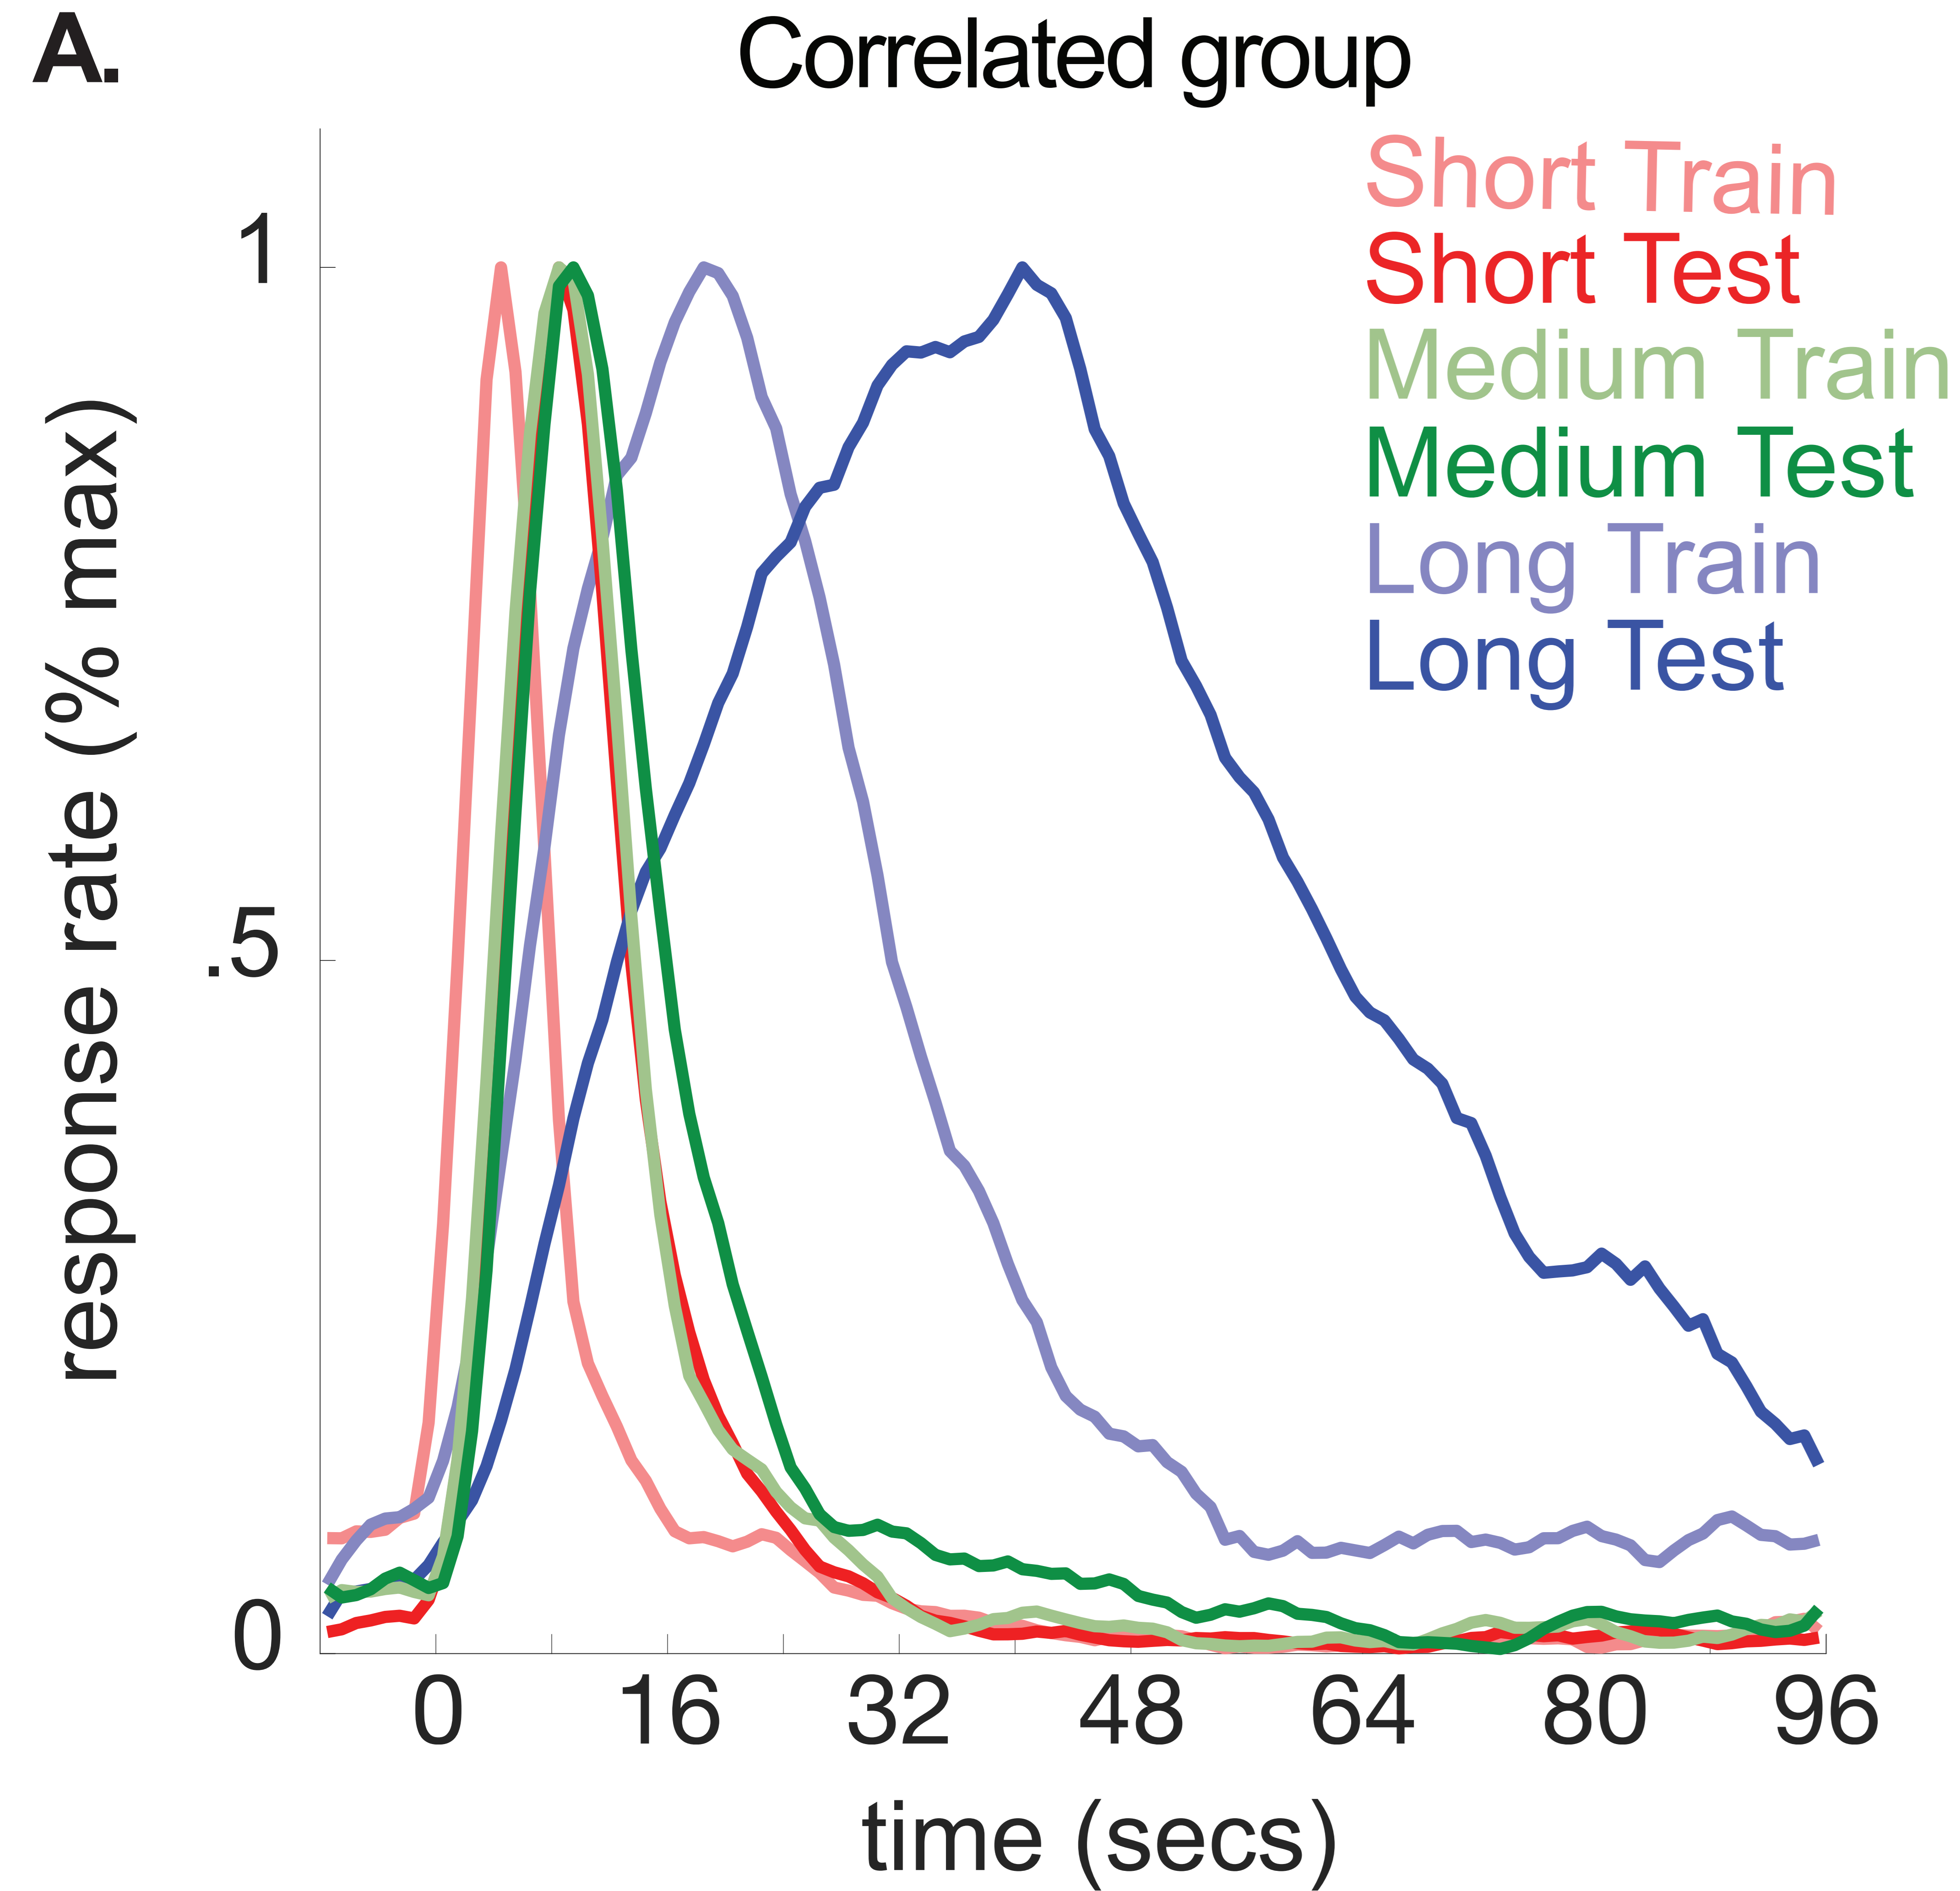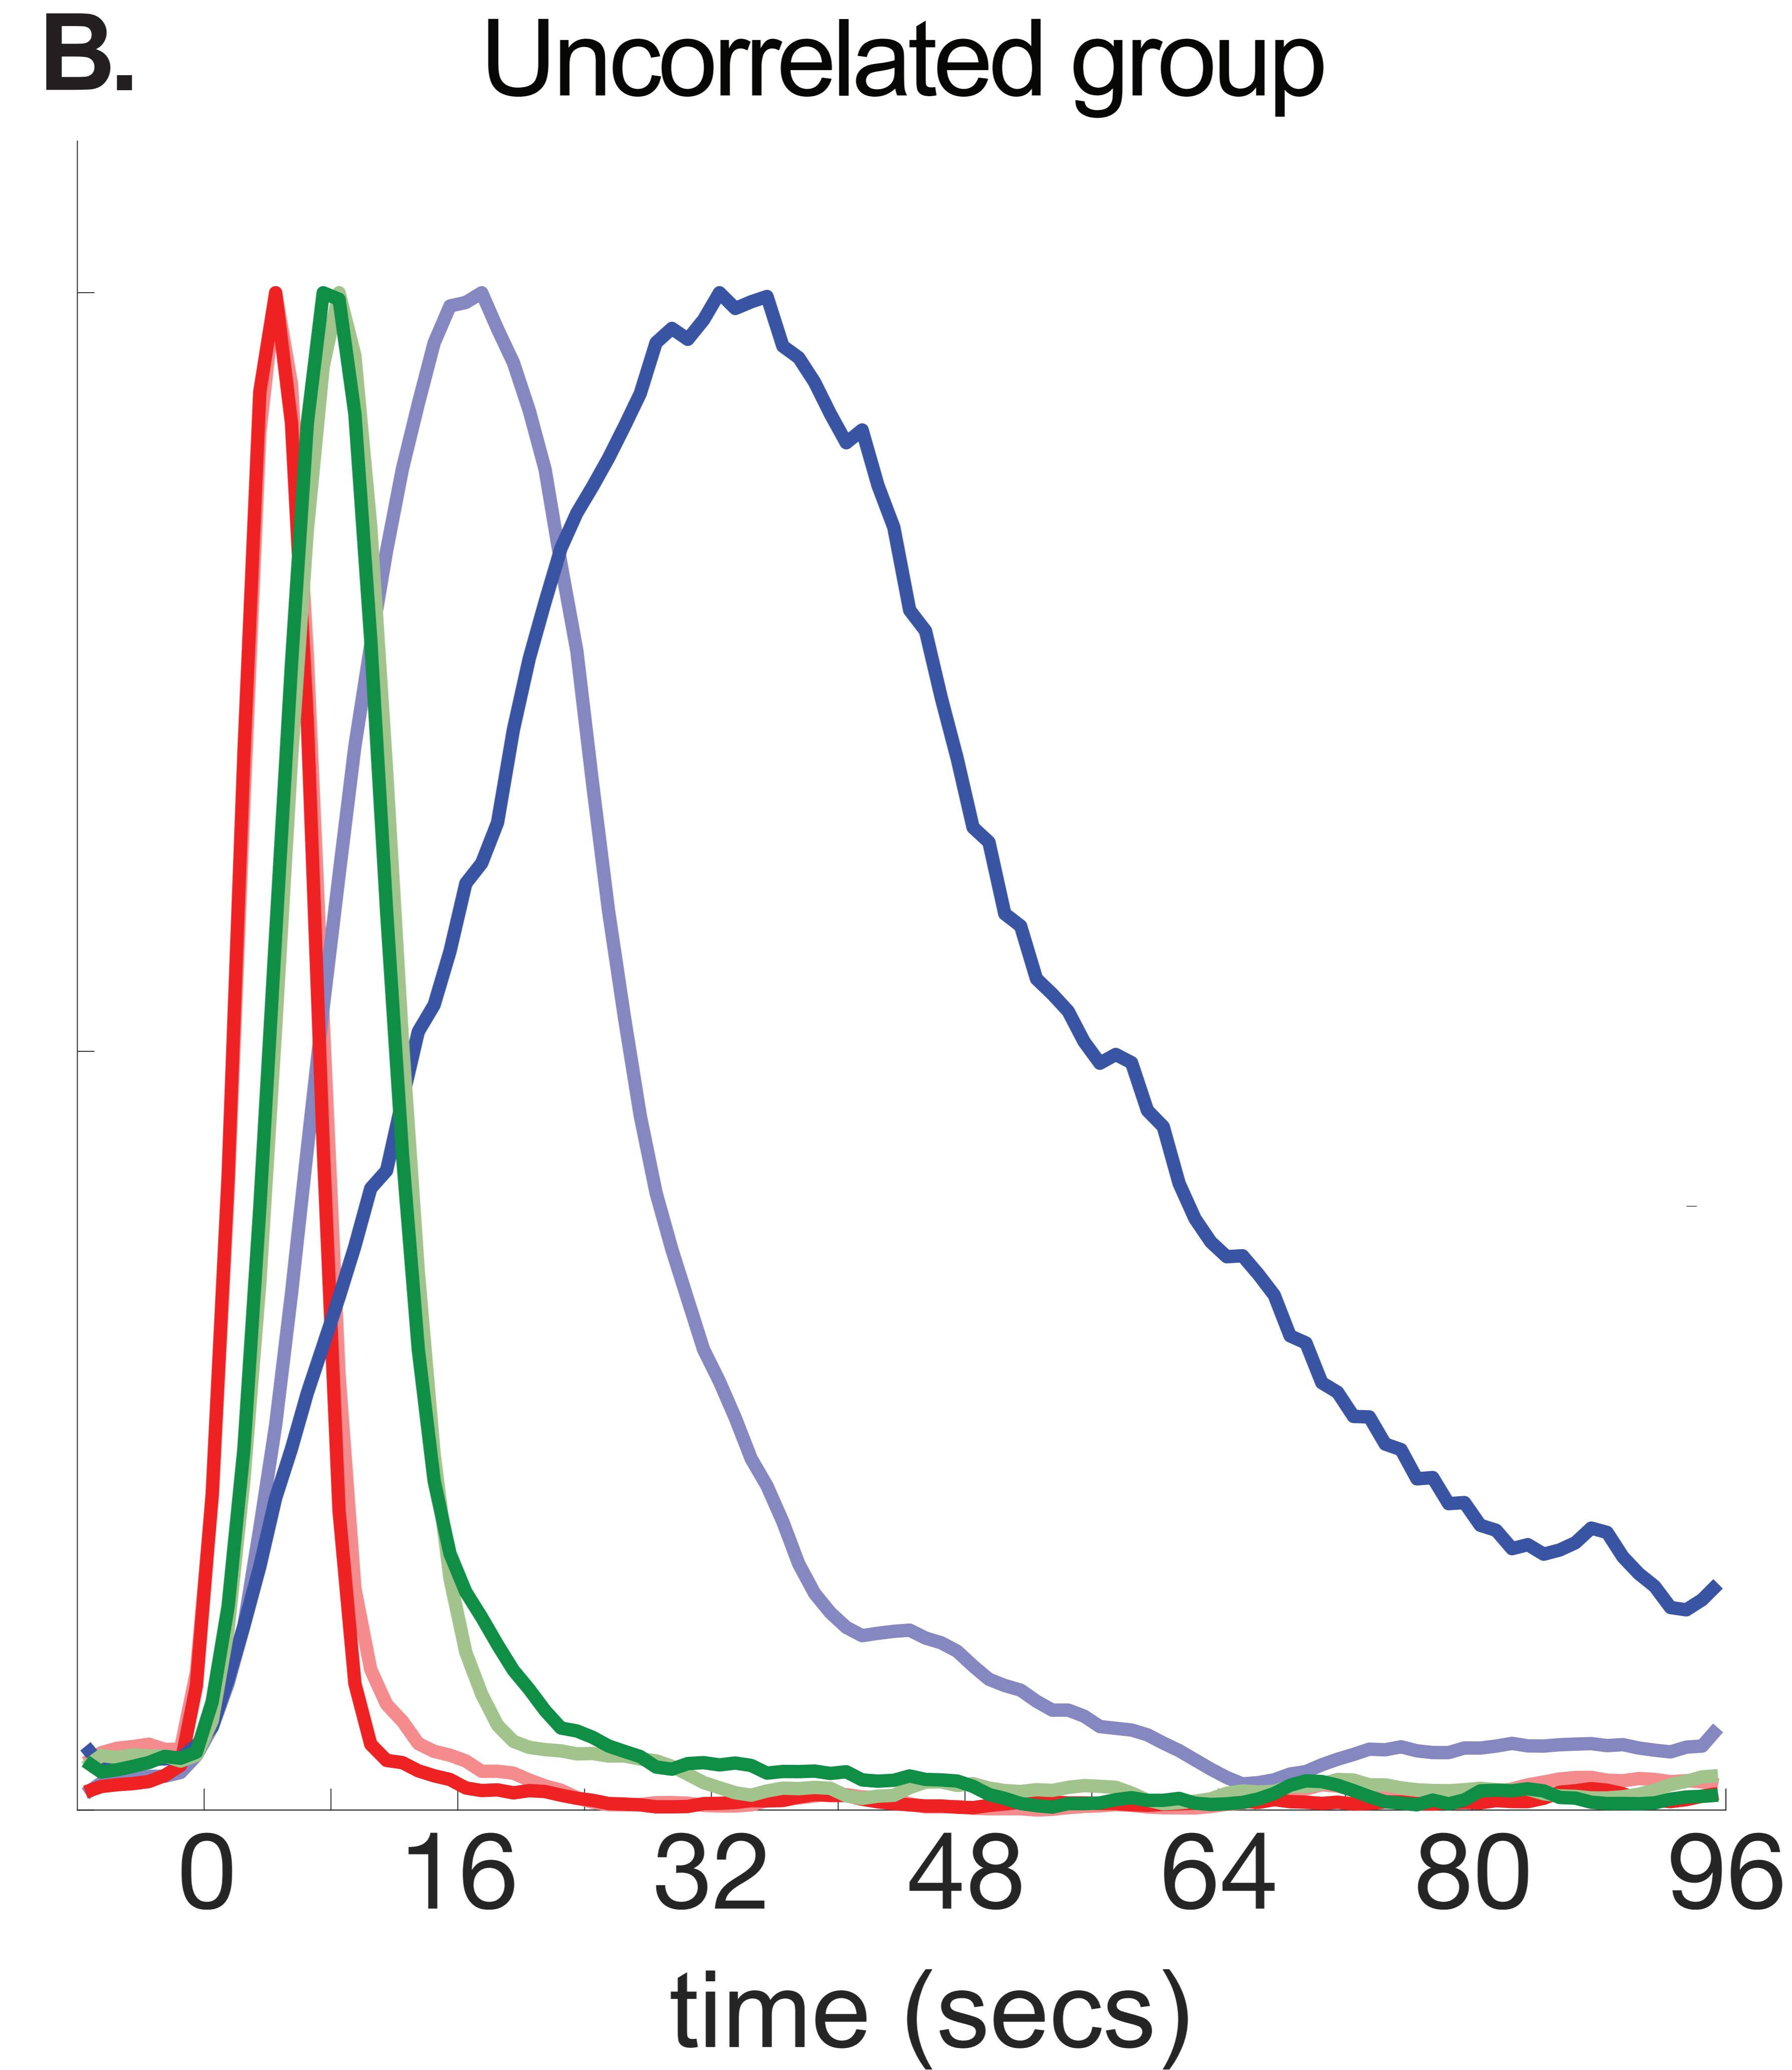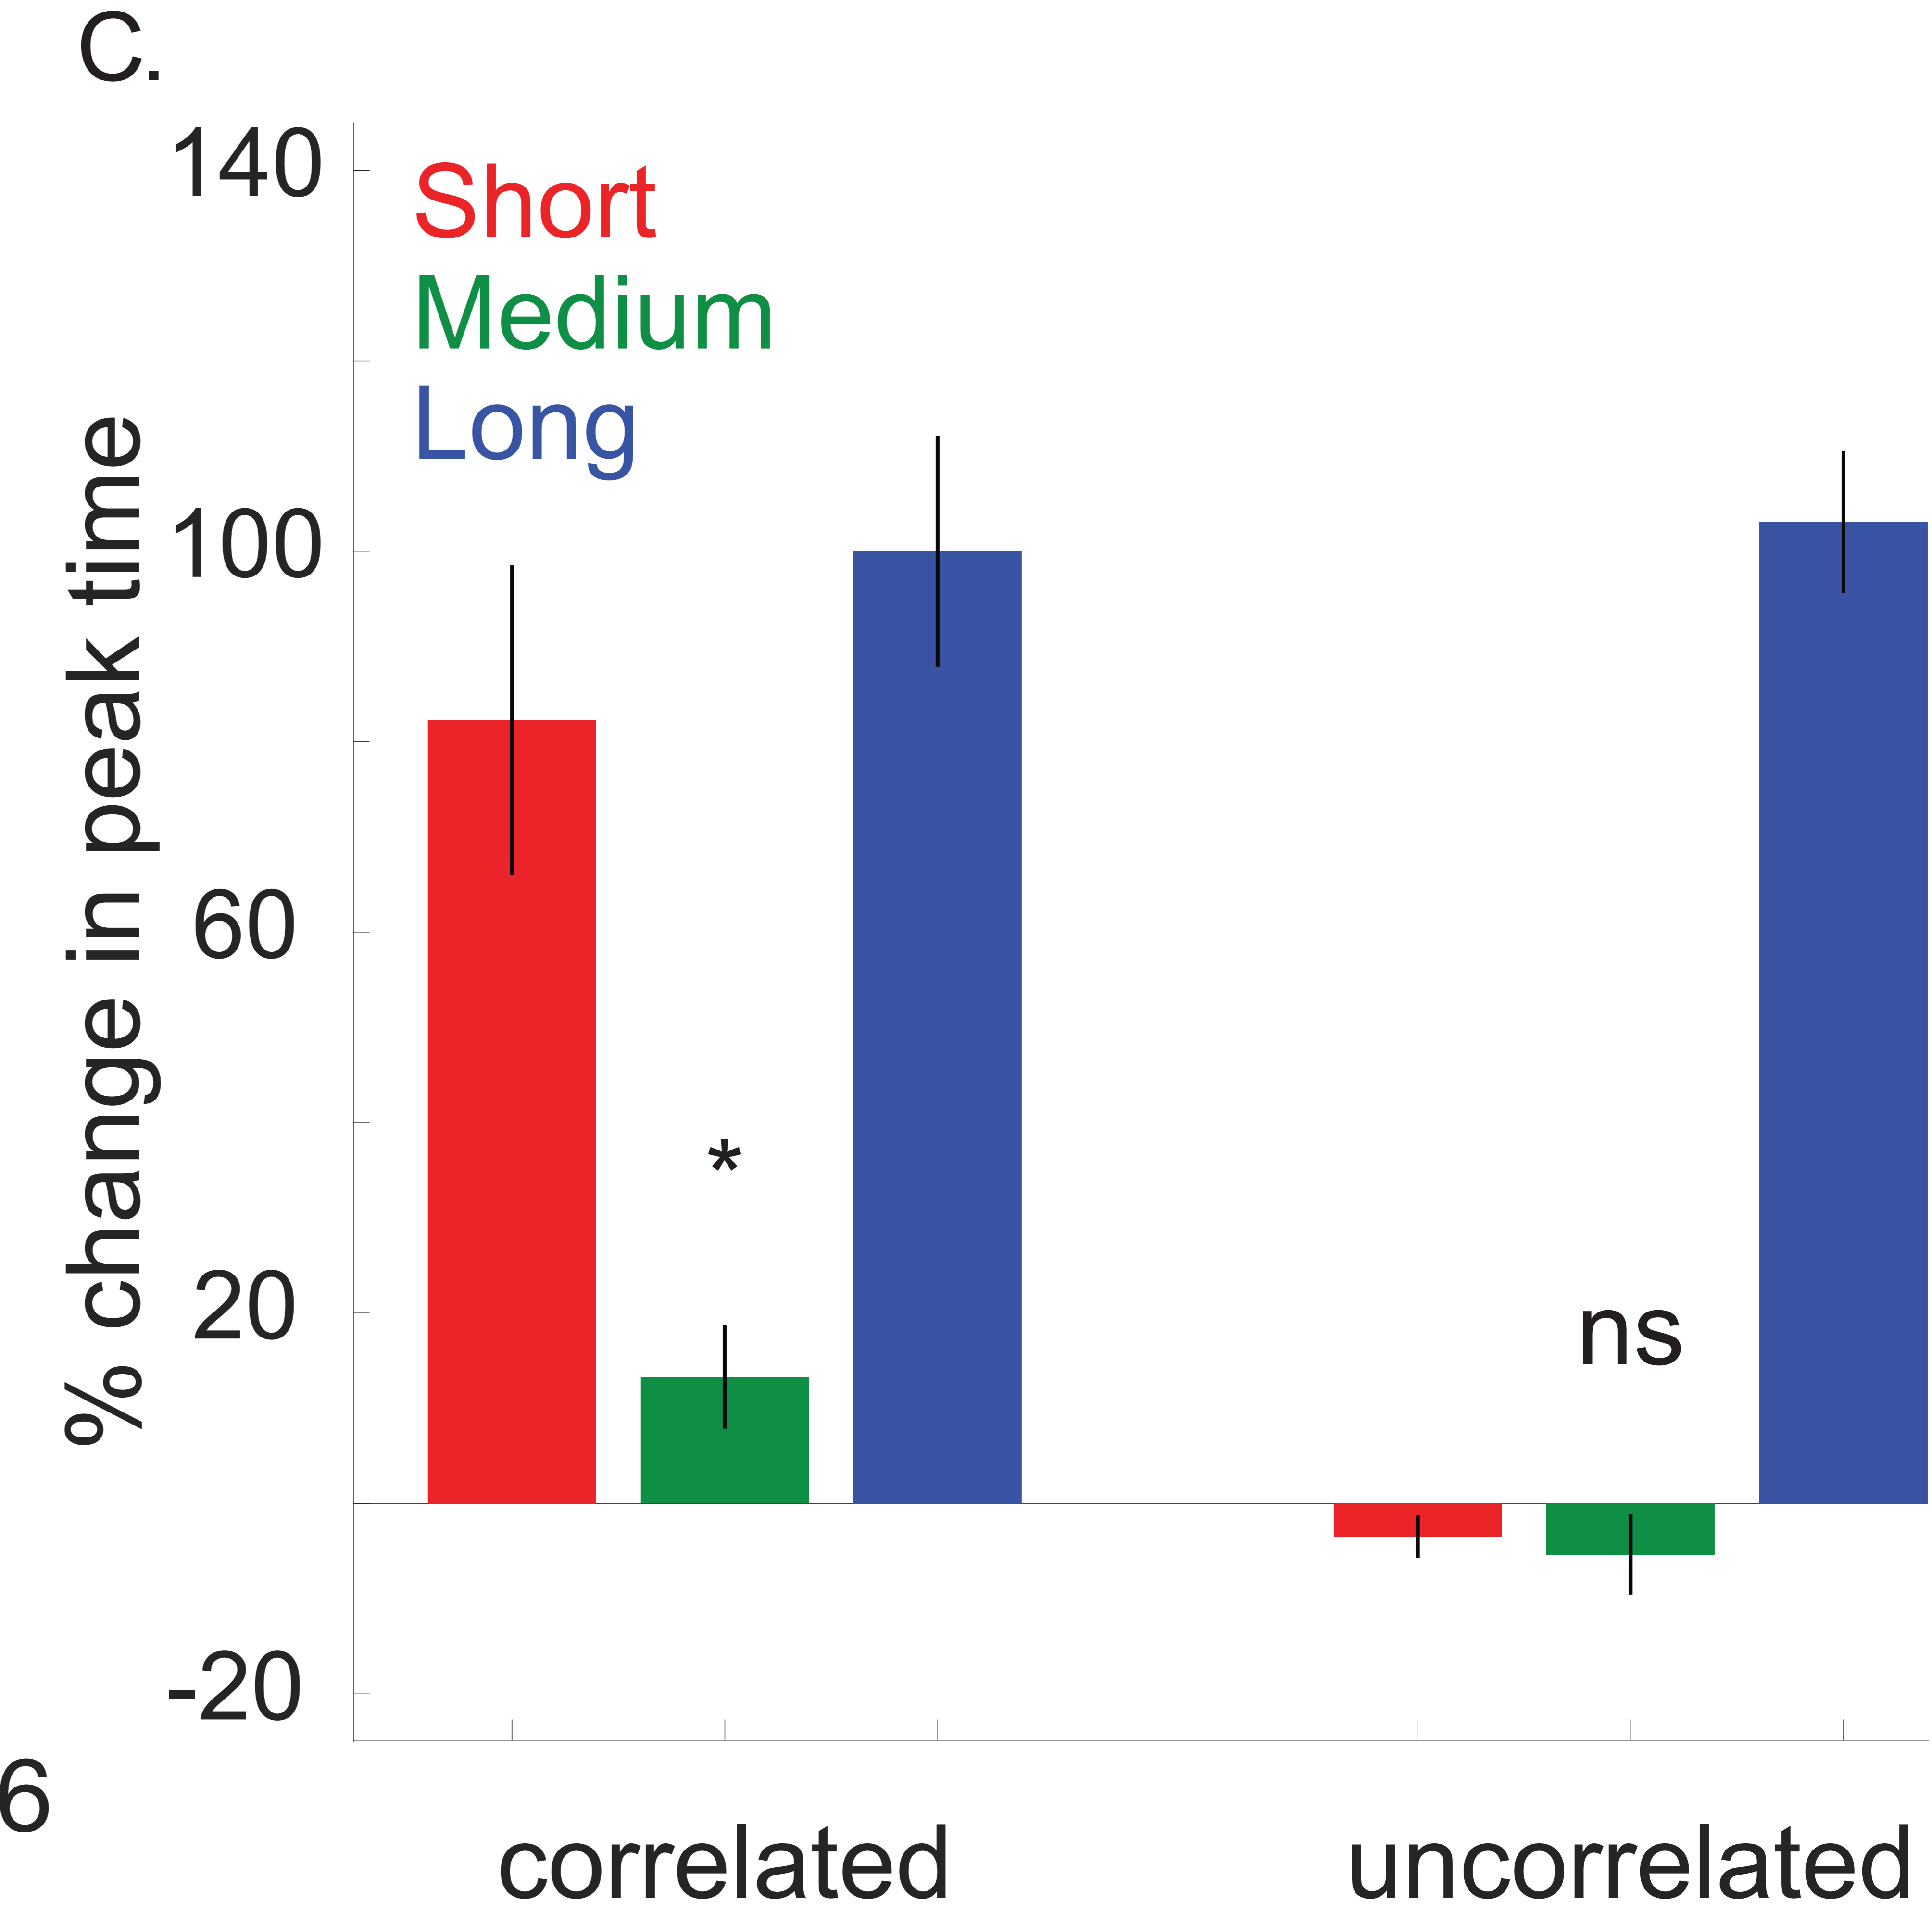

Supplement: supp [file elife-38790-supp-v1.zip › elife_poa_e38790_Figure_5_figure_supplement_1.pdf]

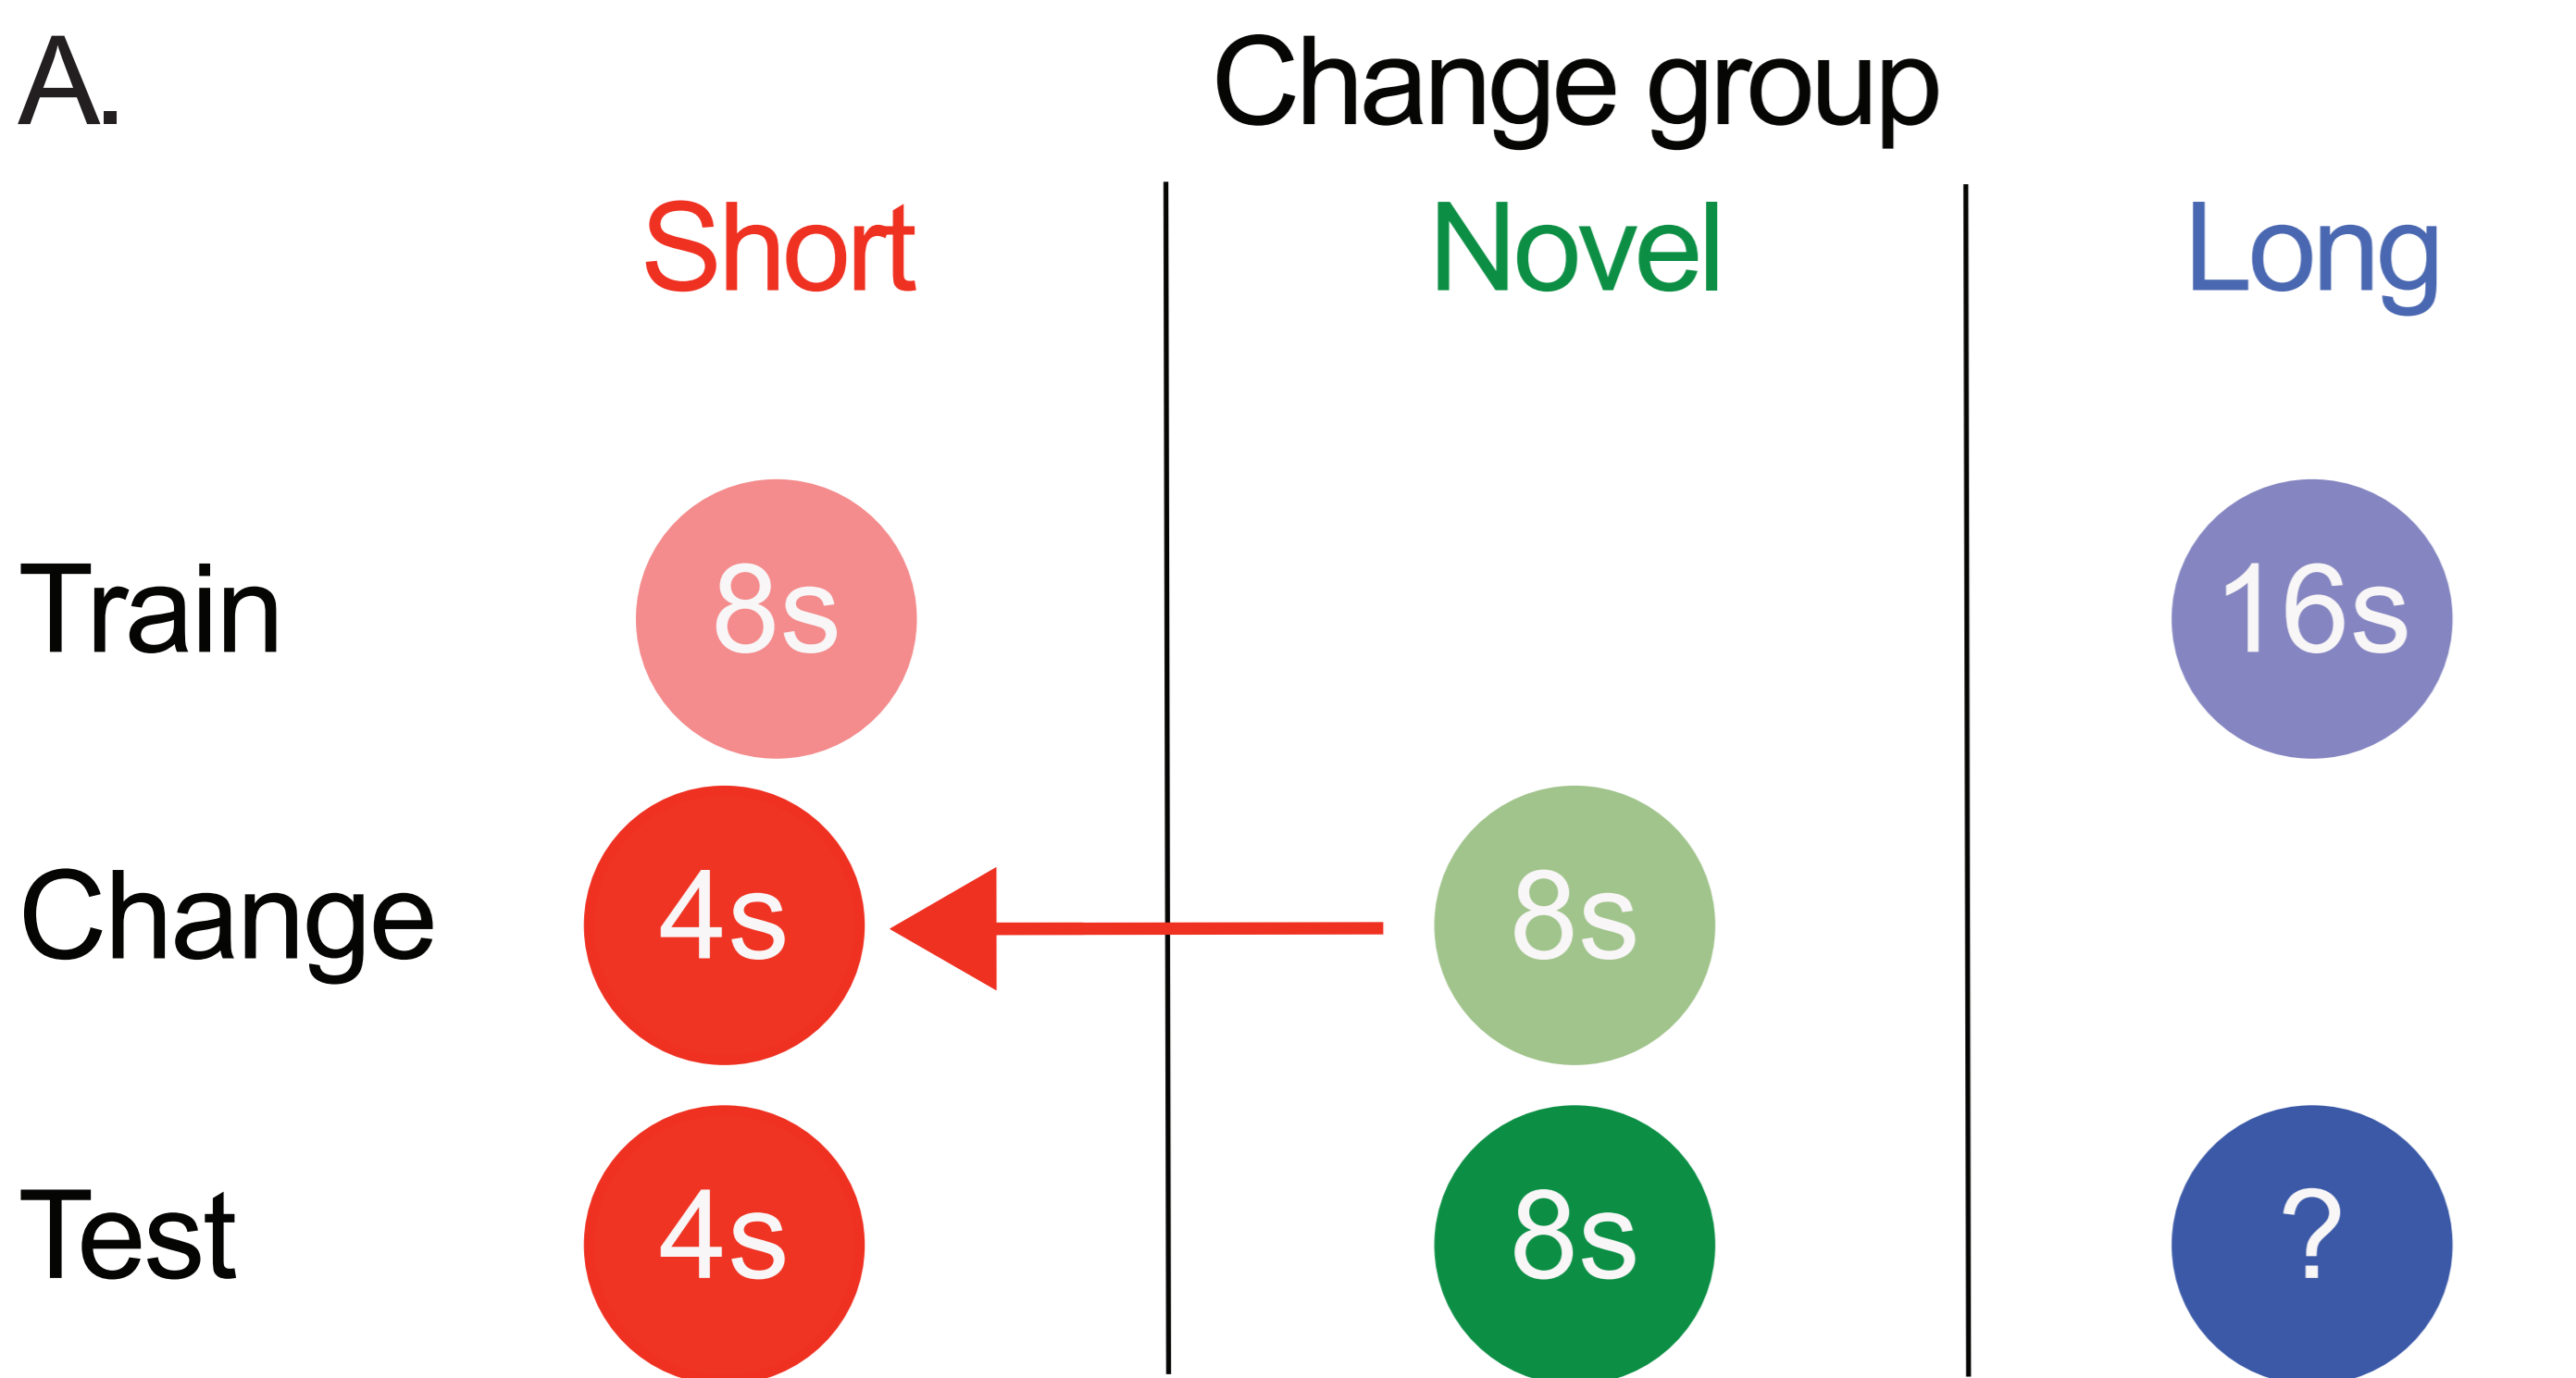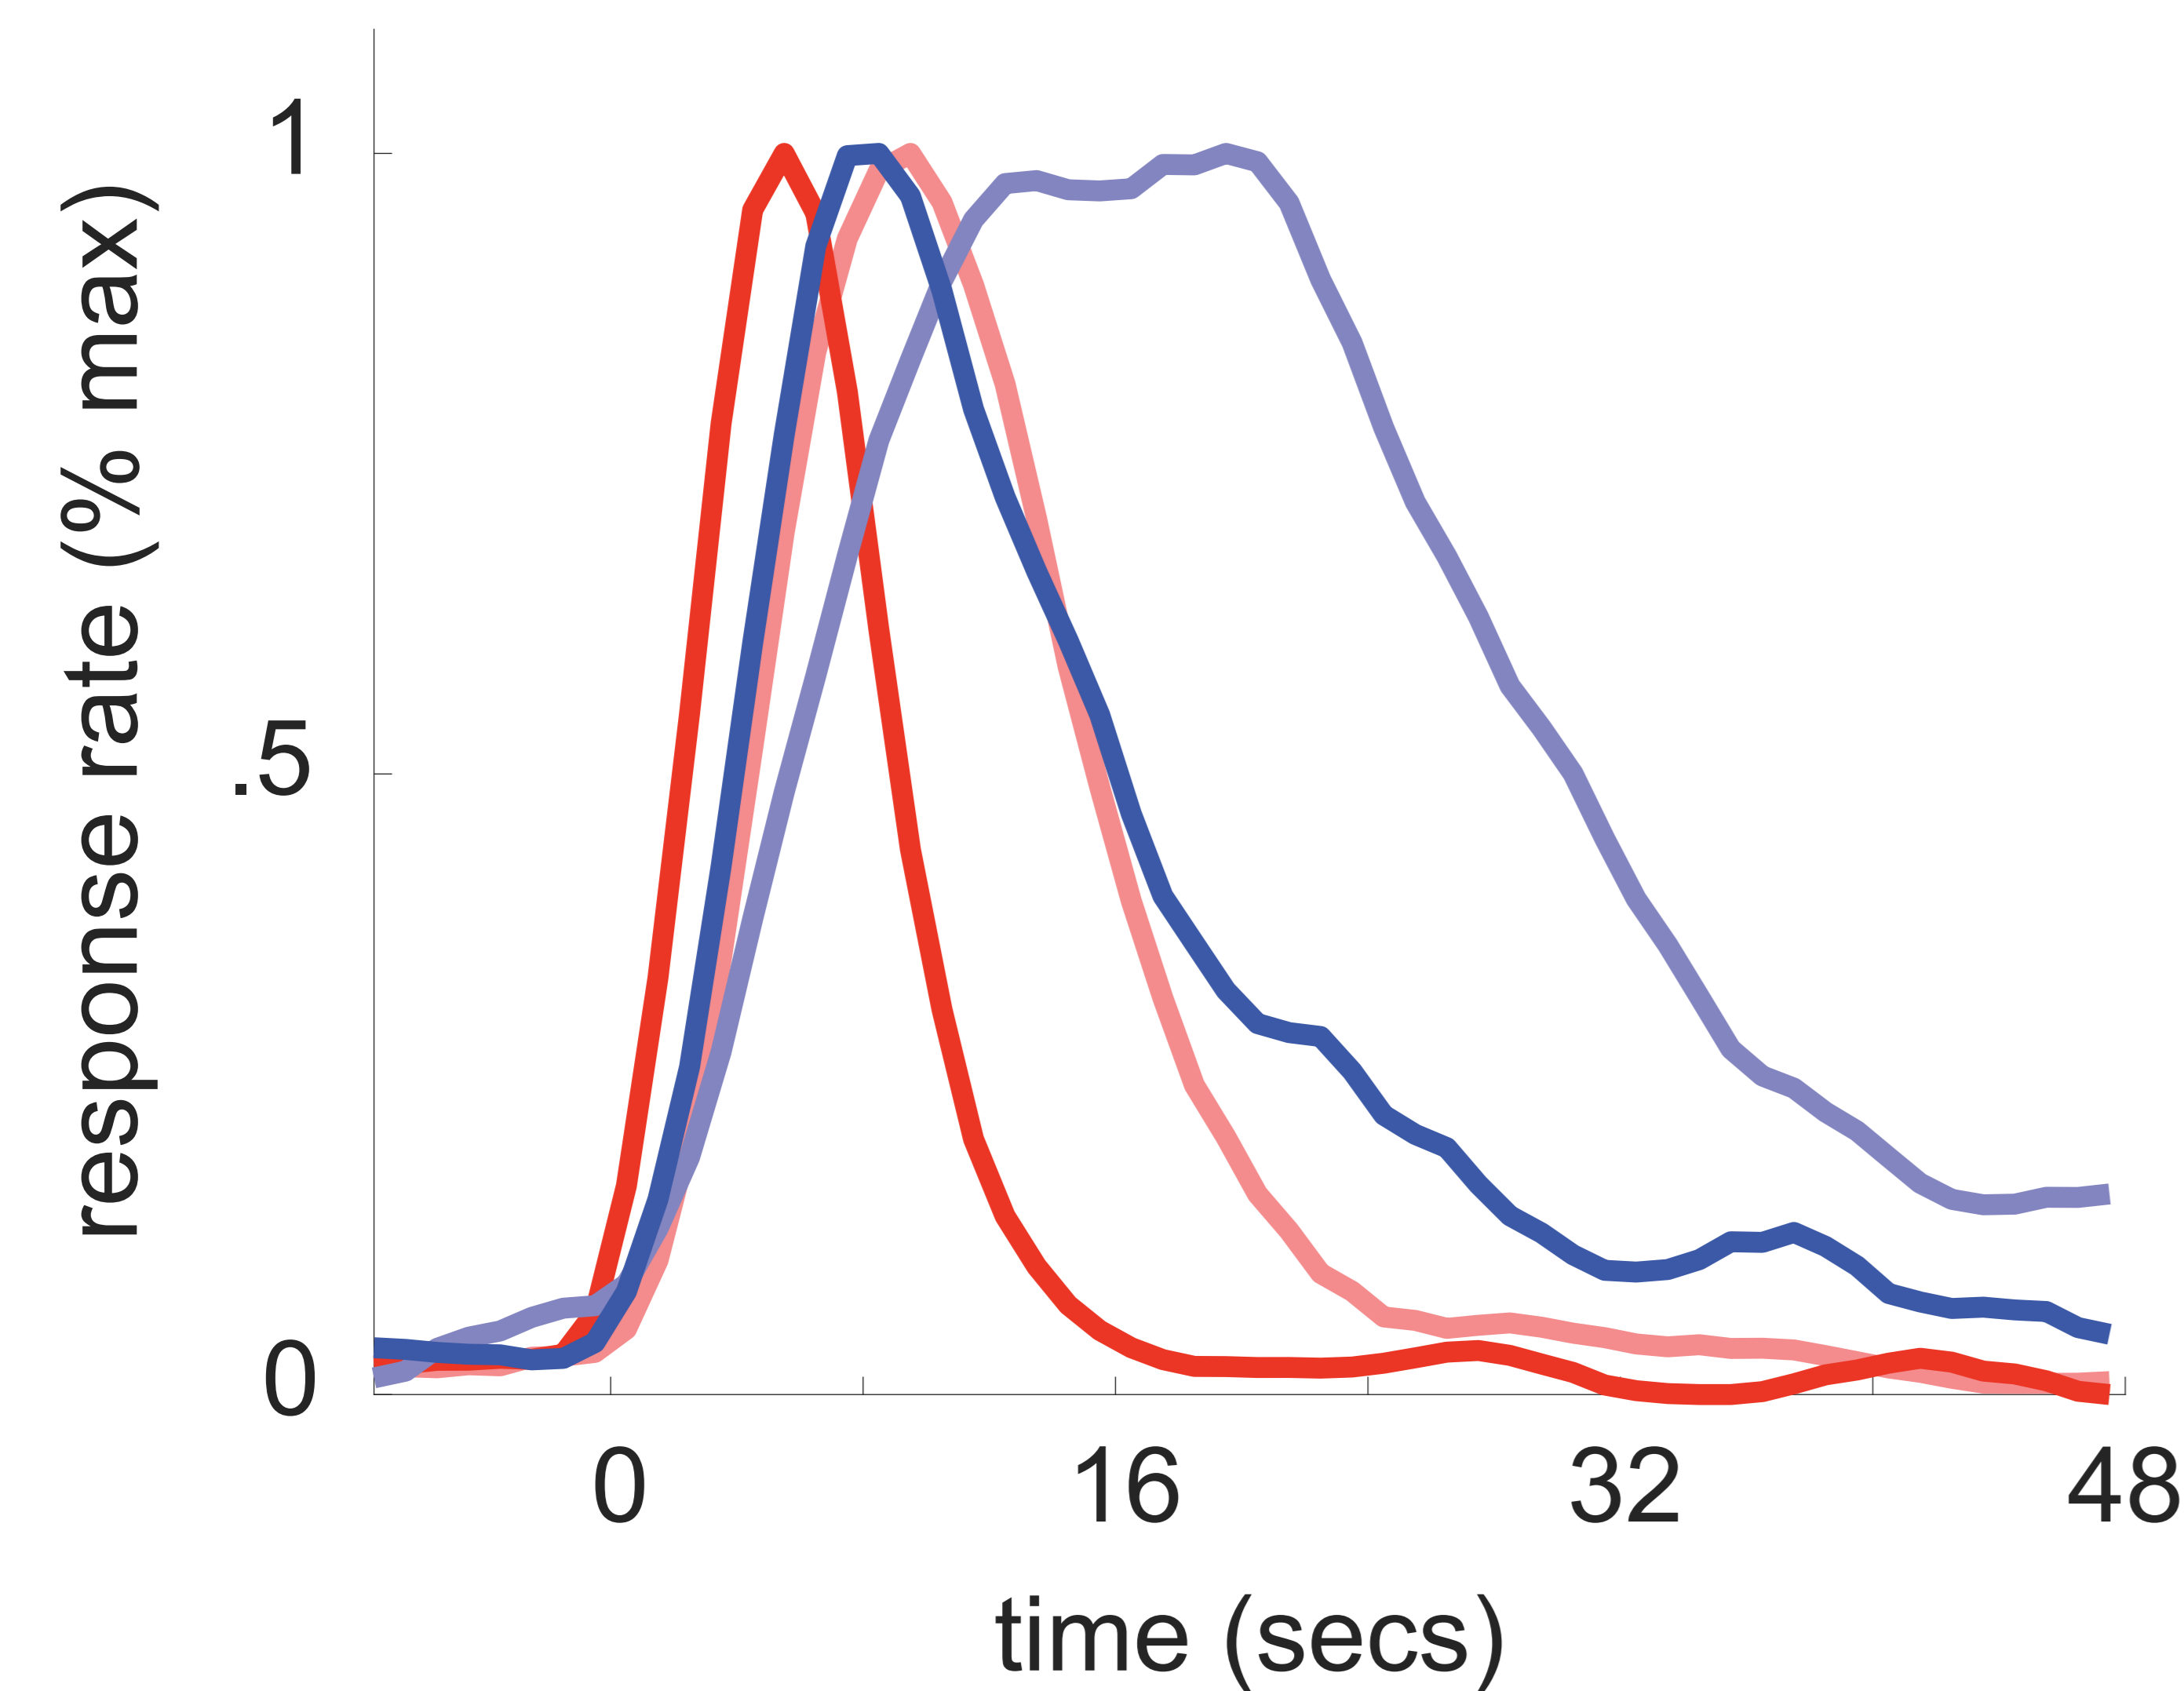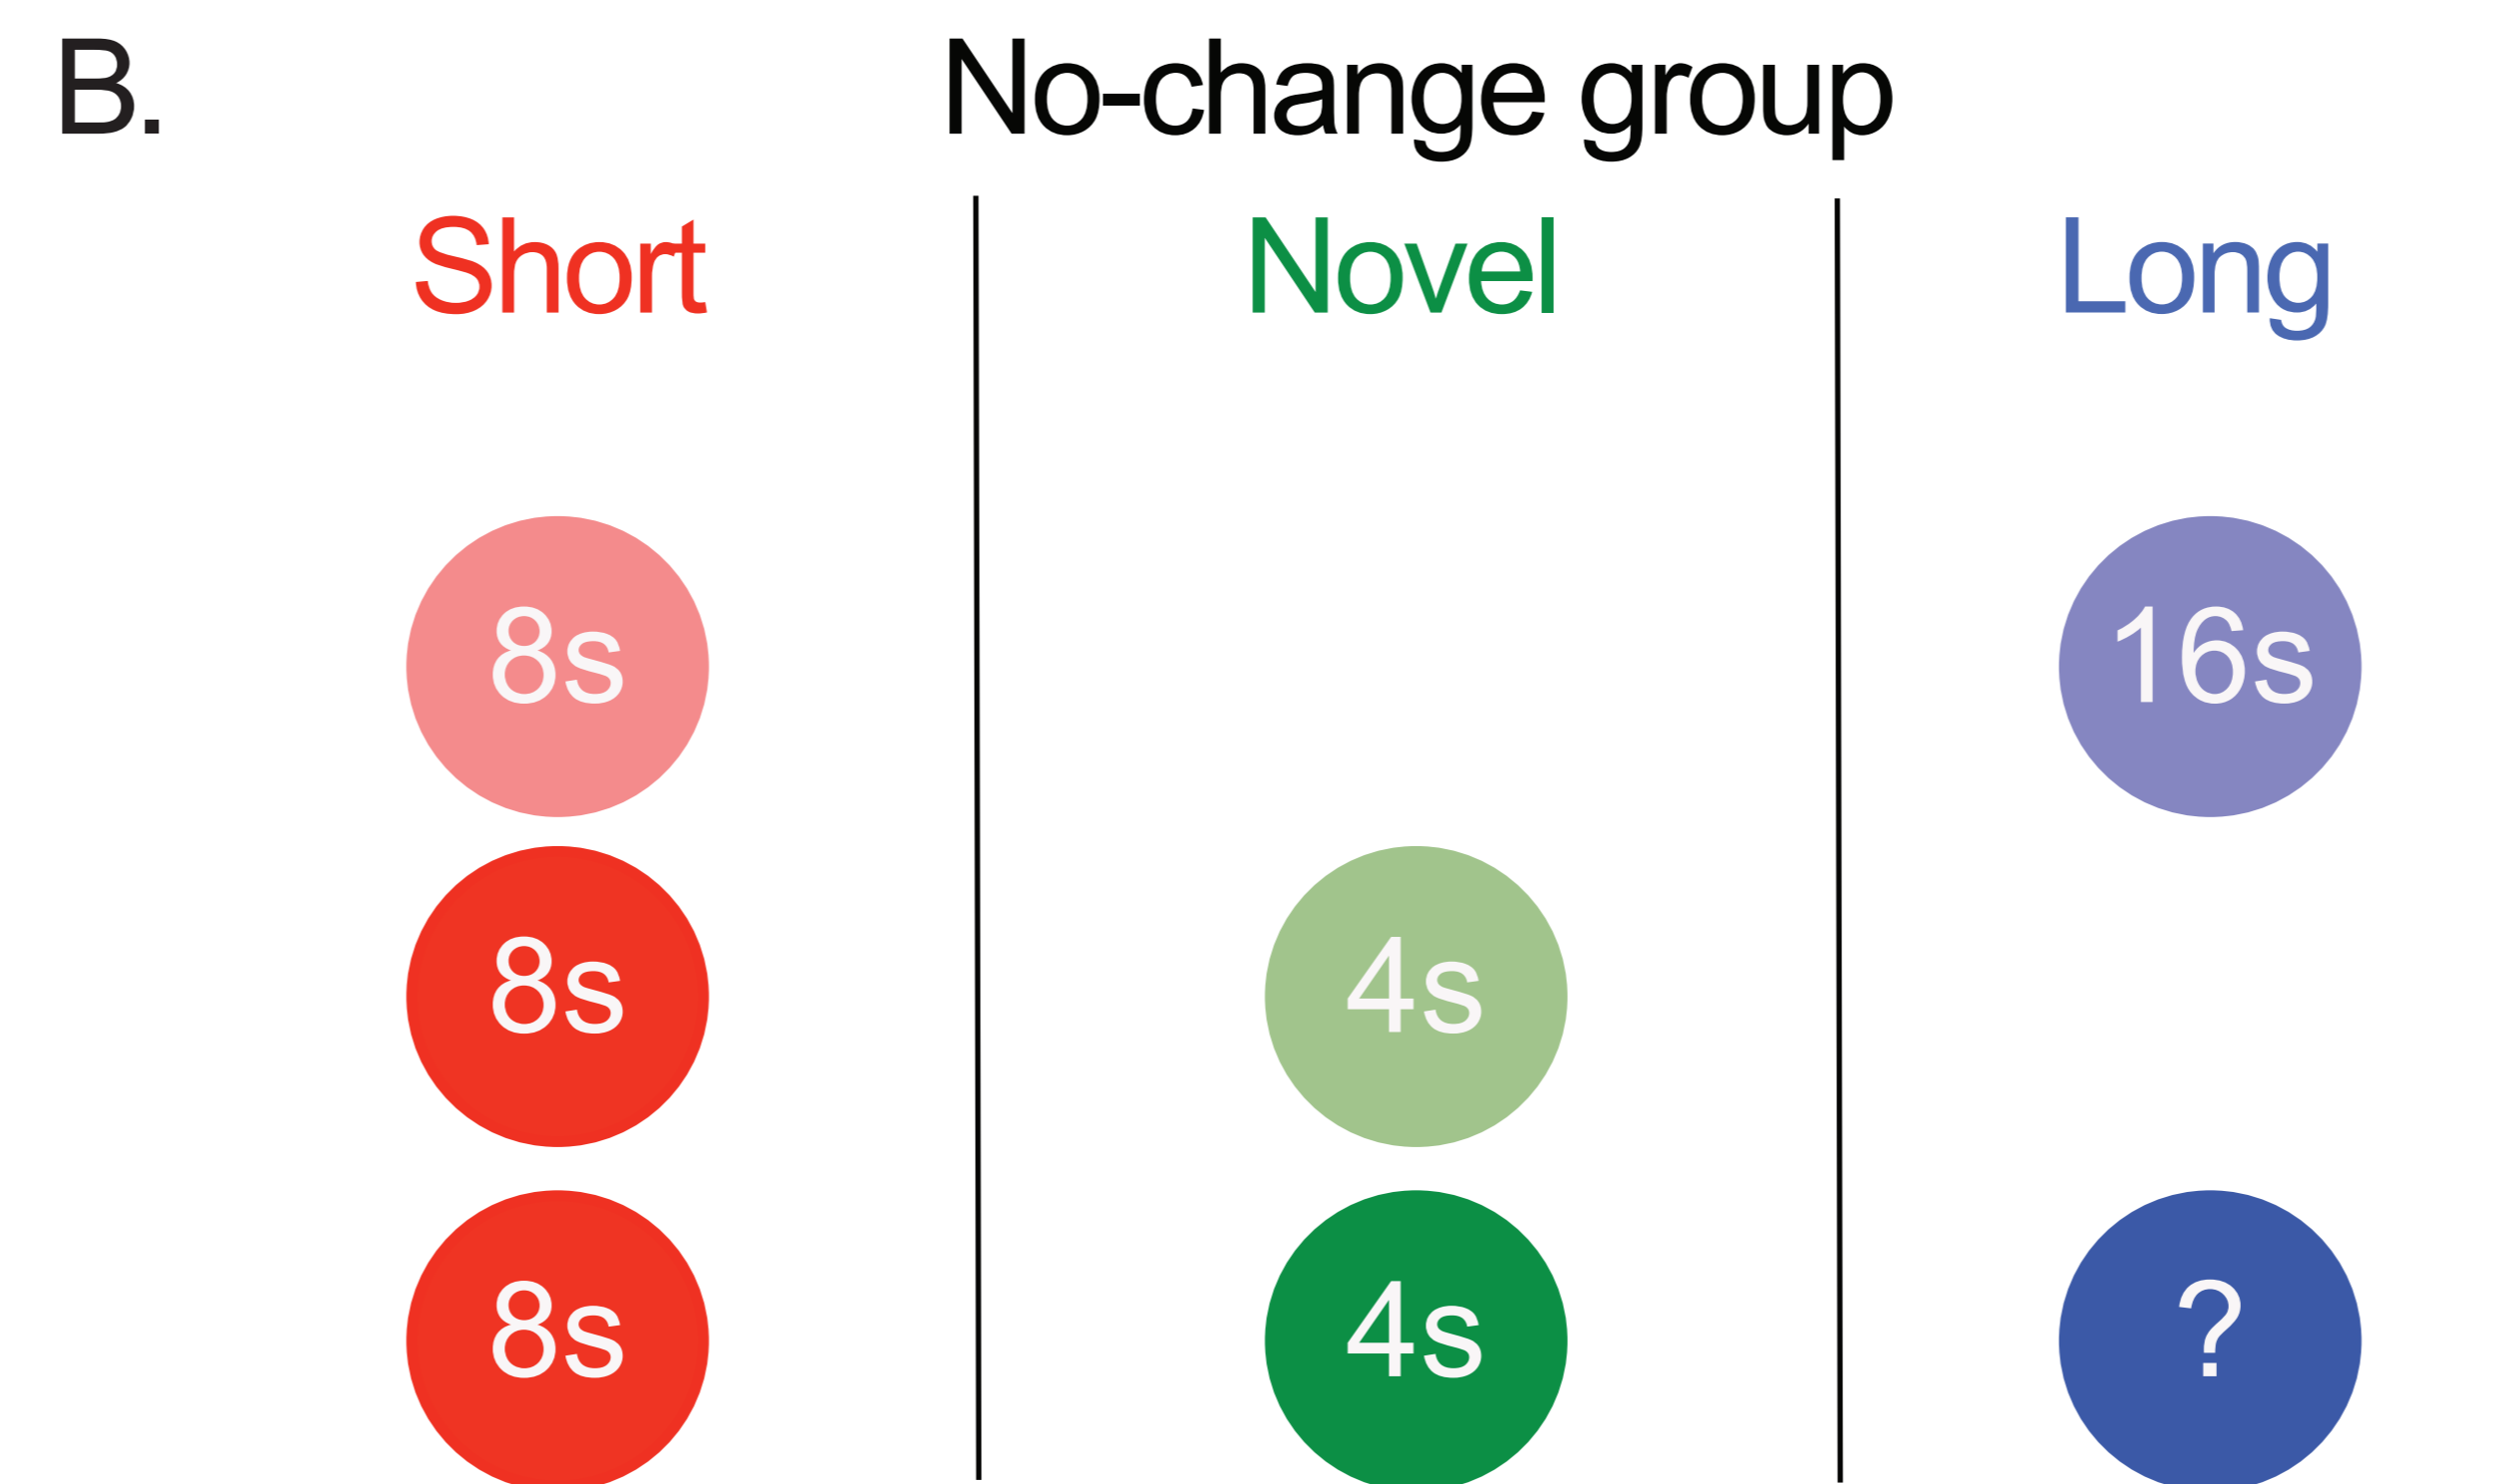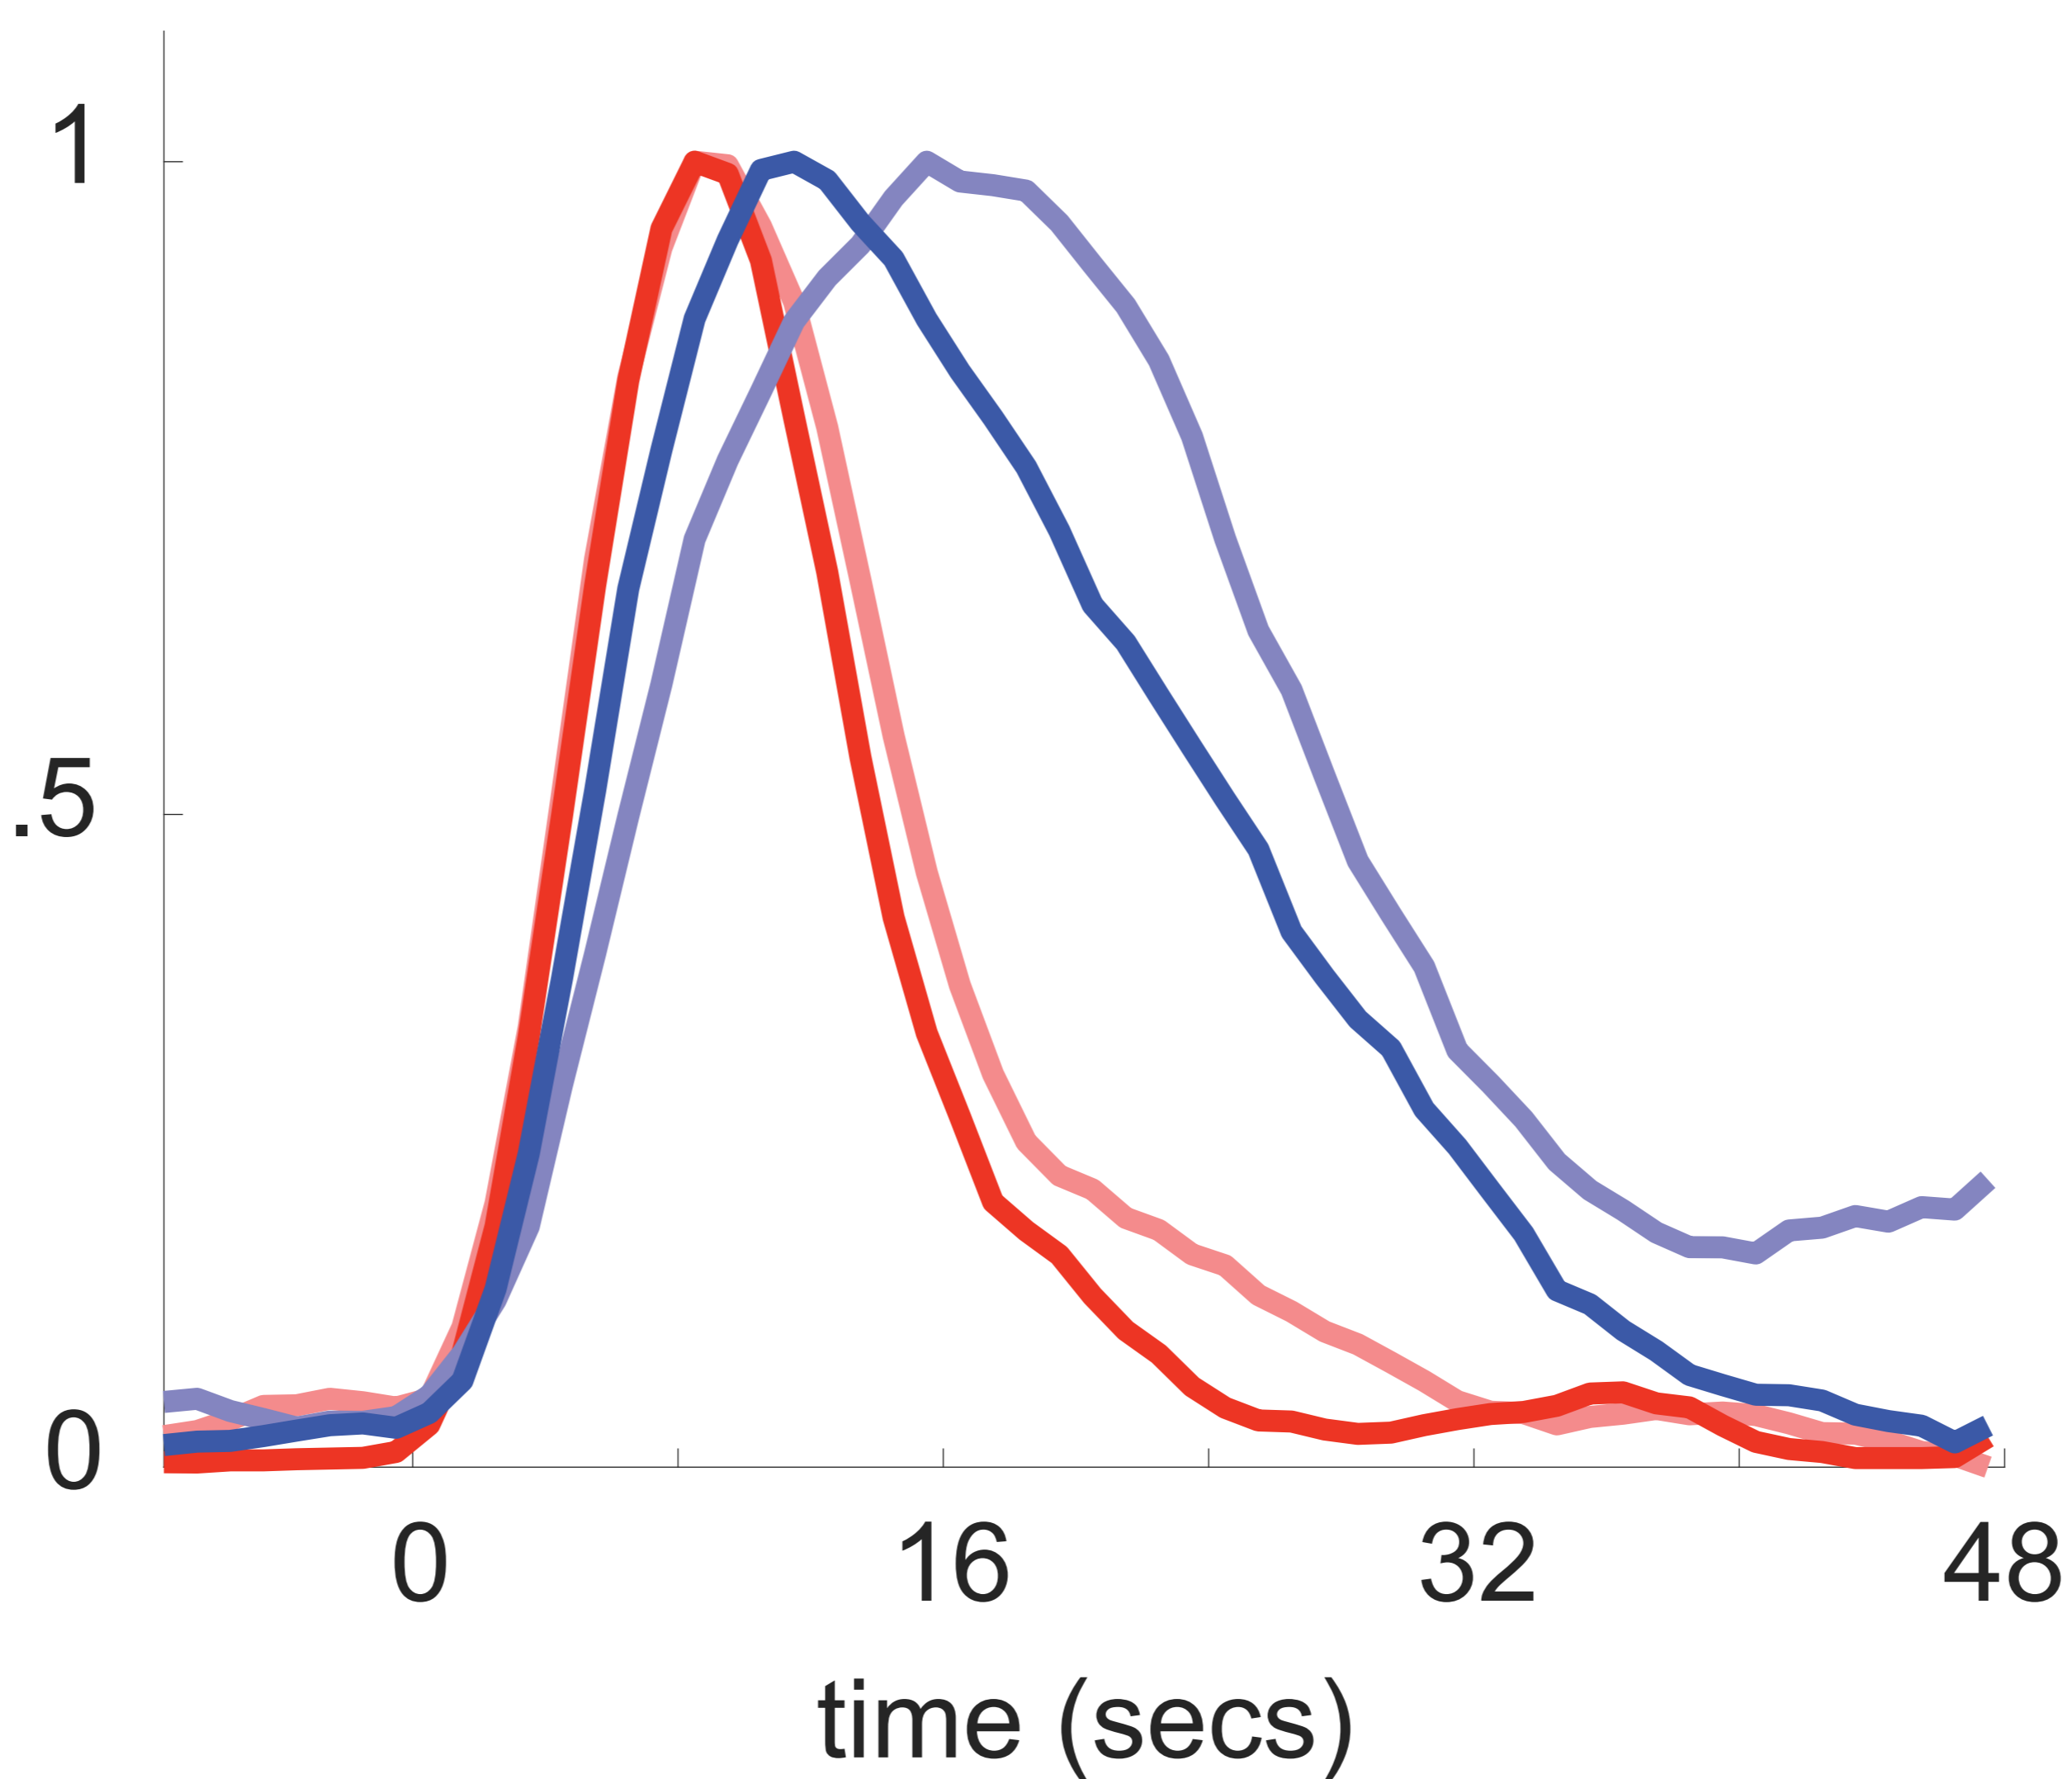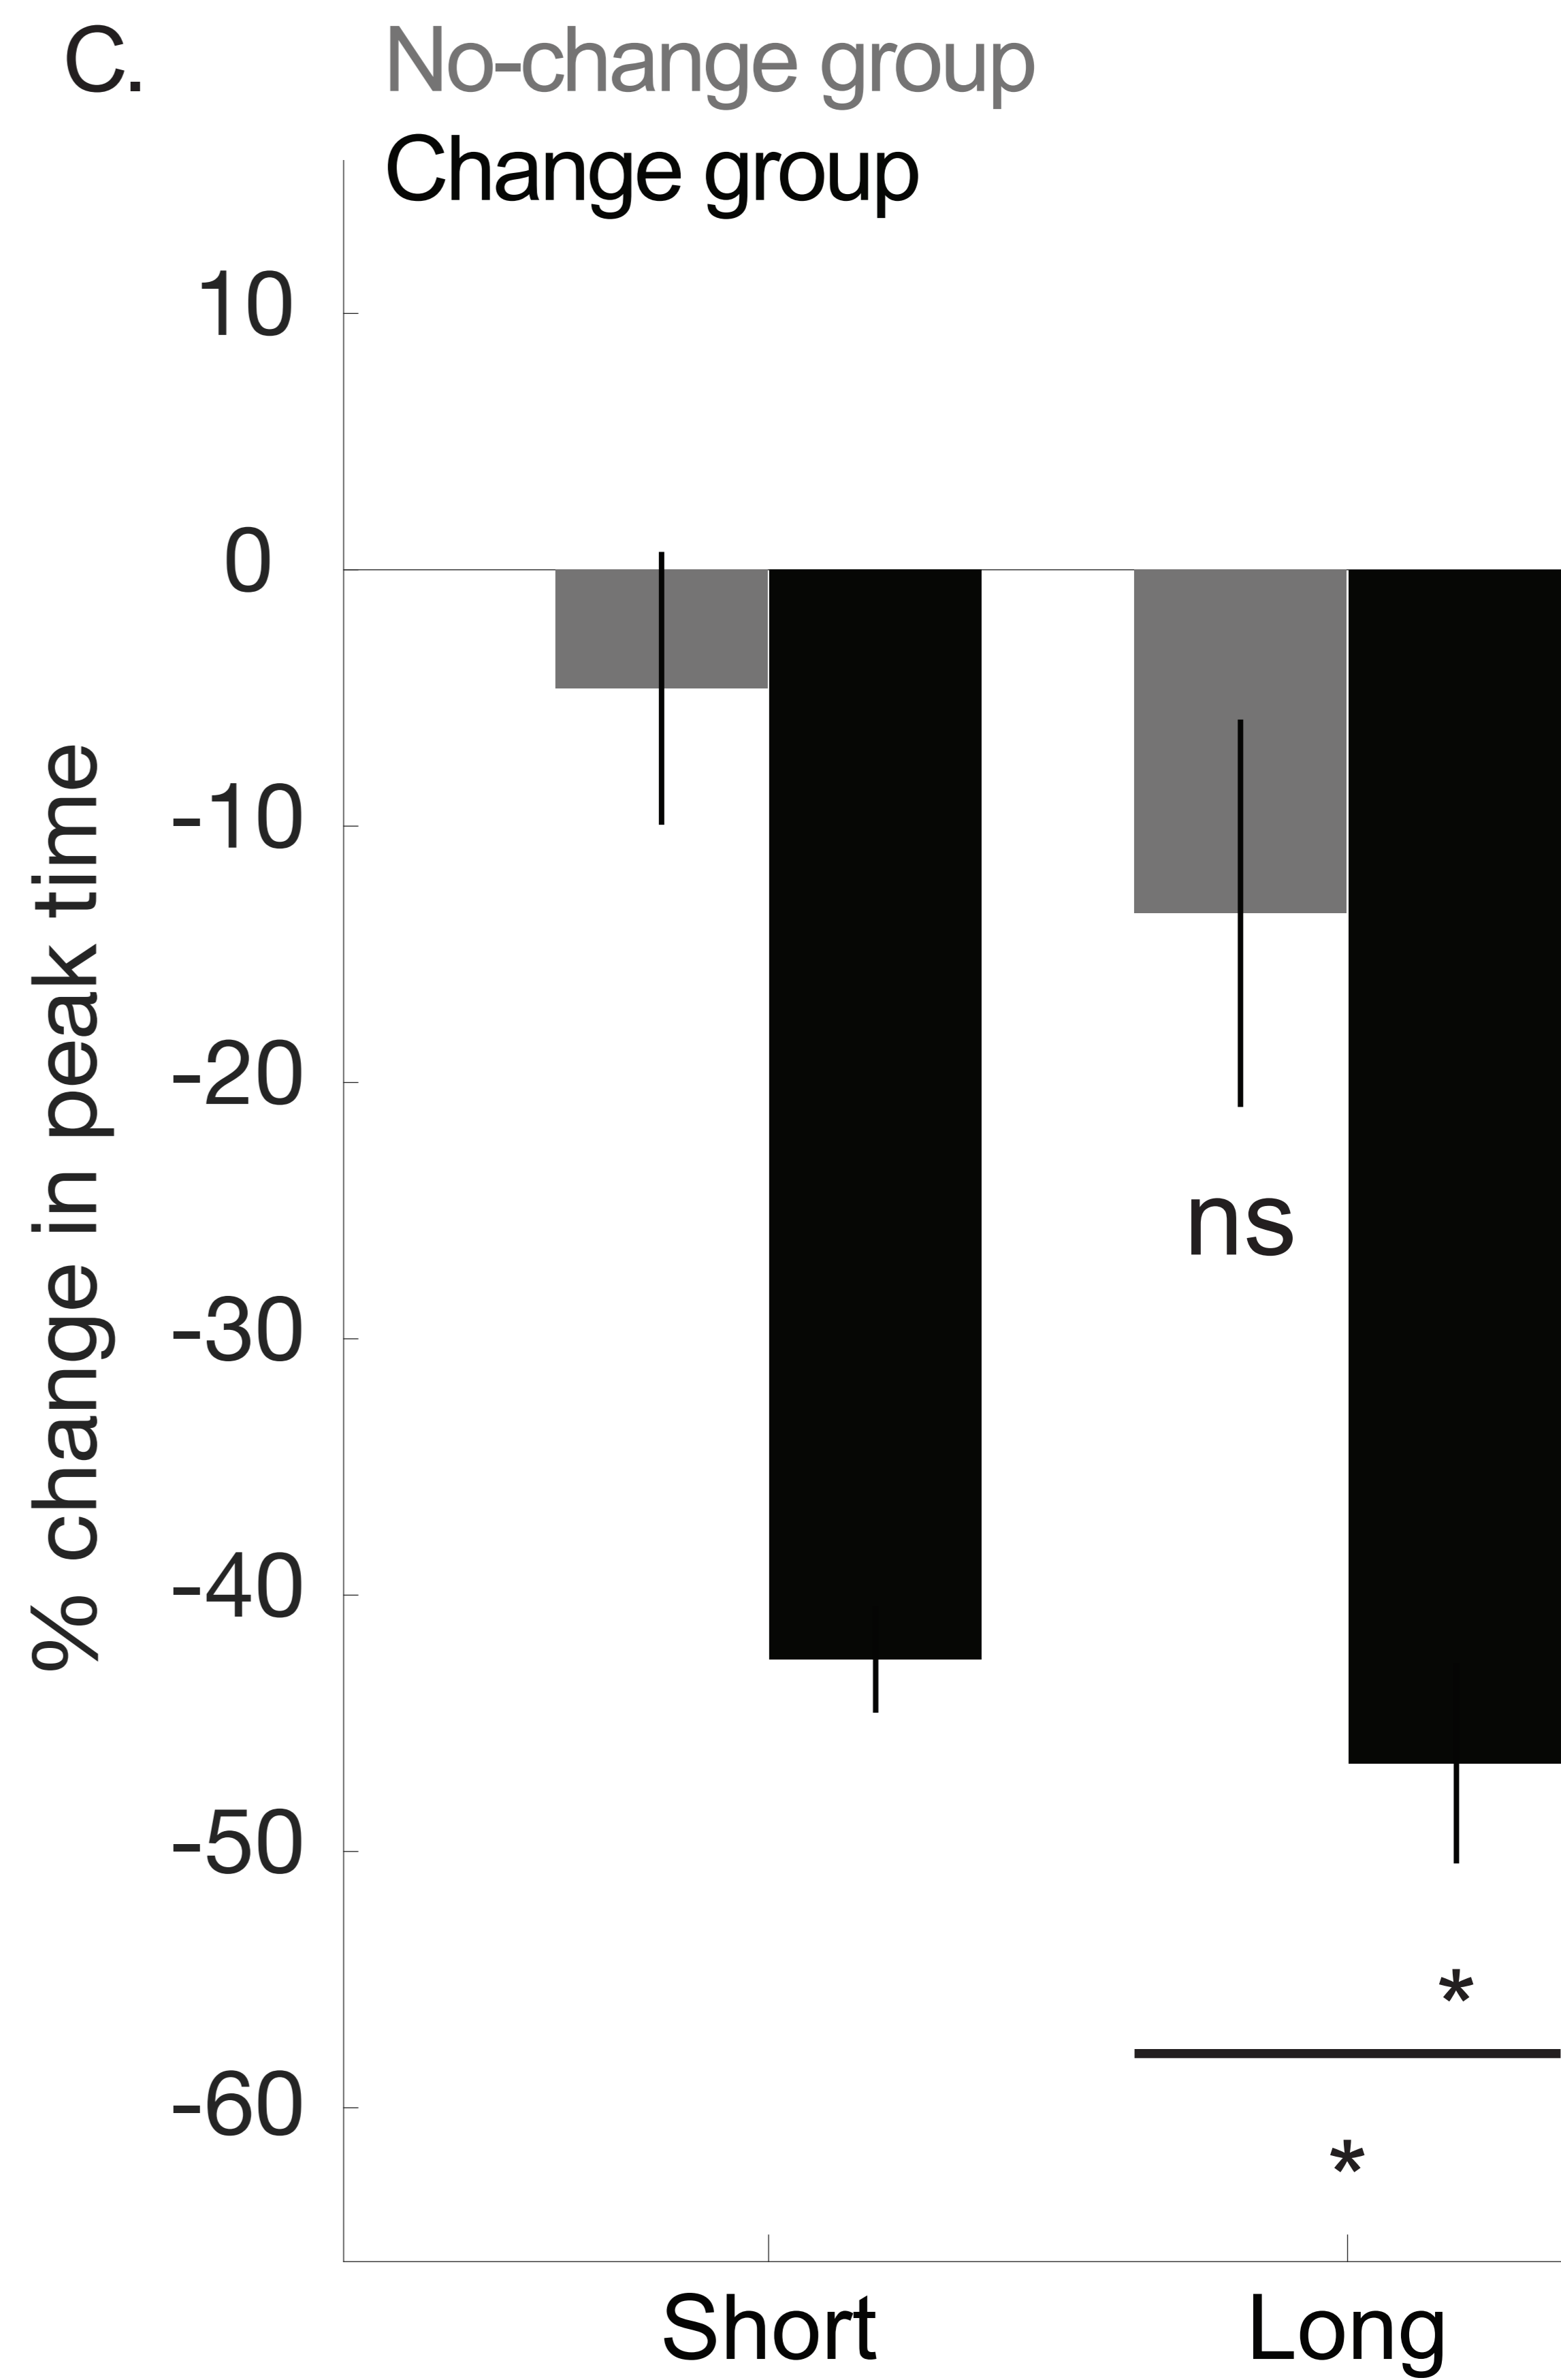

Supplement: supp [file elife-38790-supp-v1.zip › elife_poa_e38790_Figure_4_figure_supplement_1.pdf]

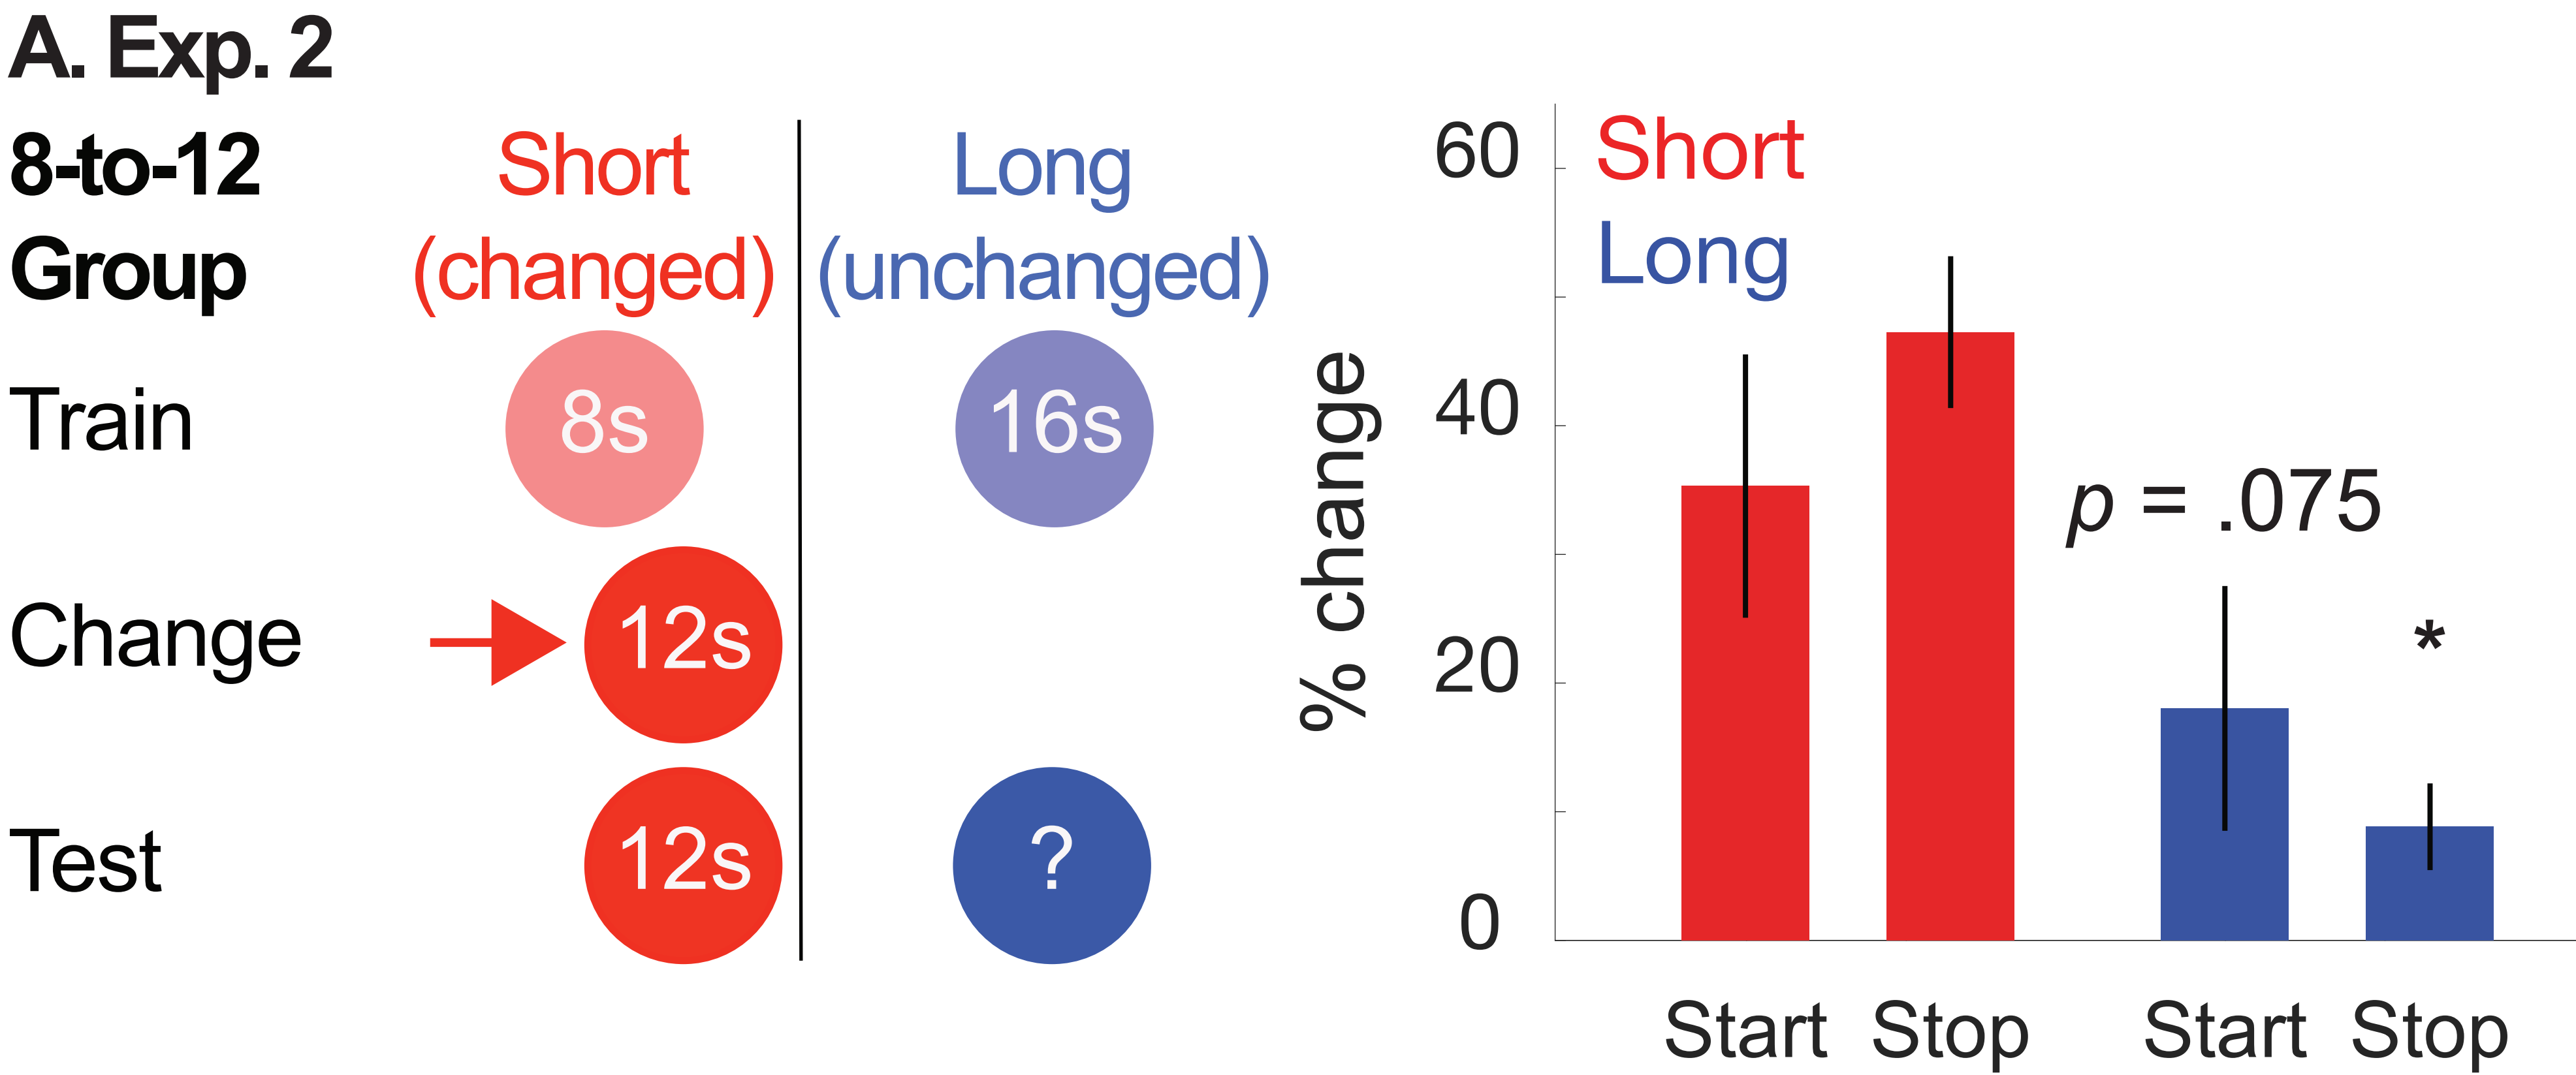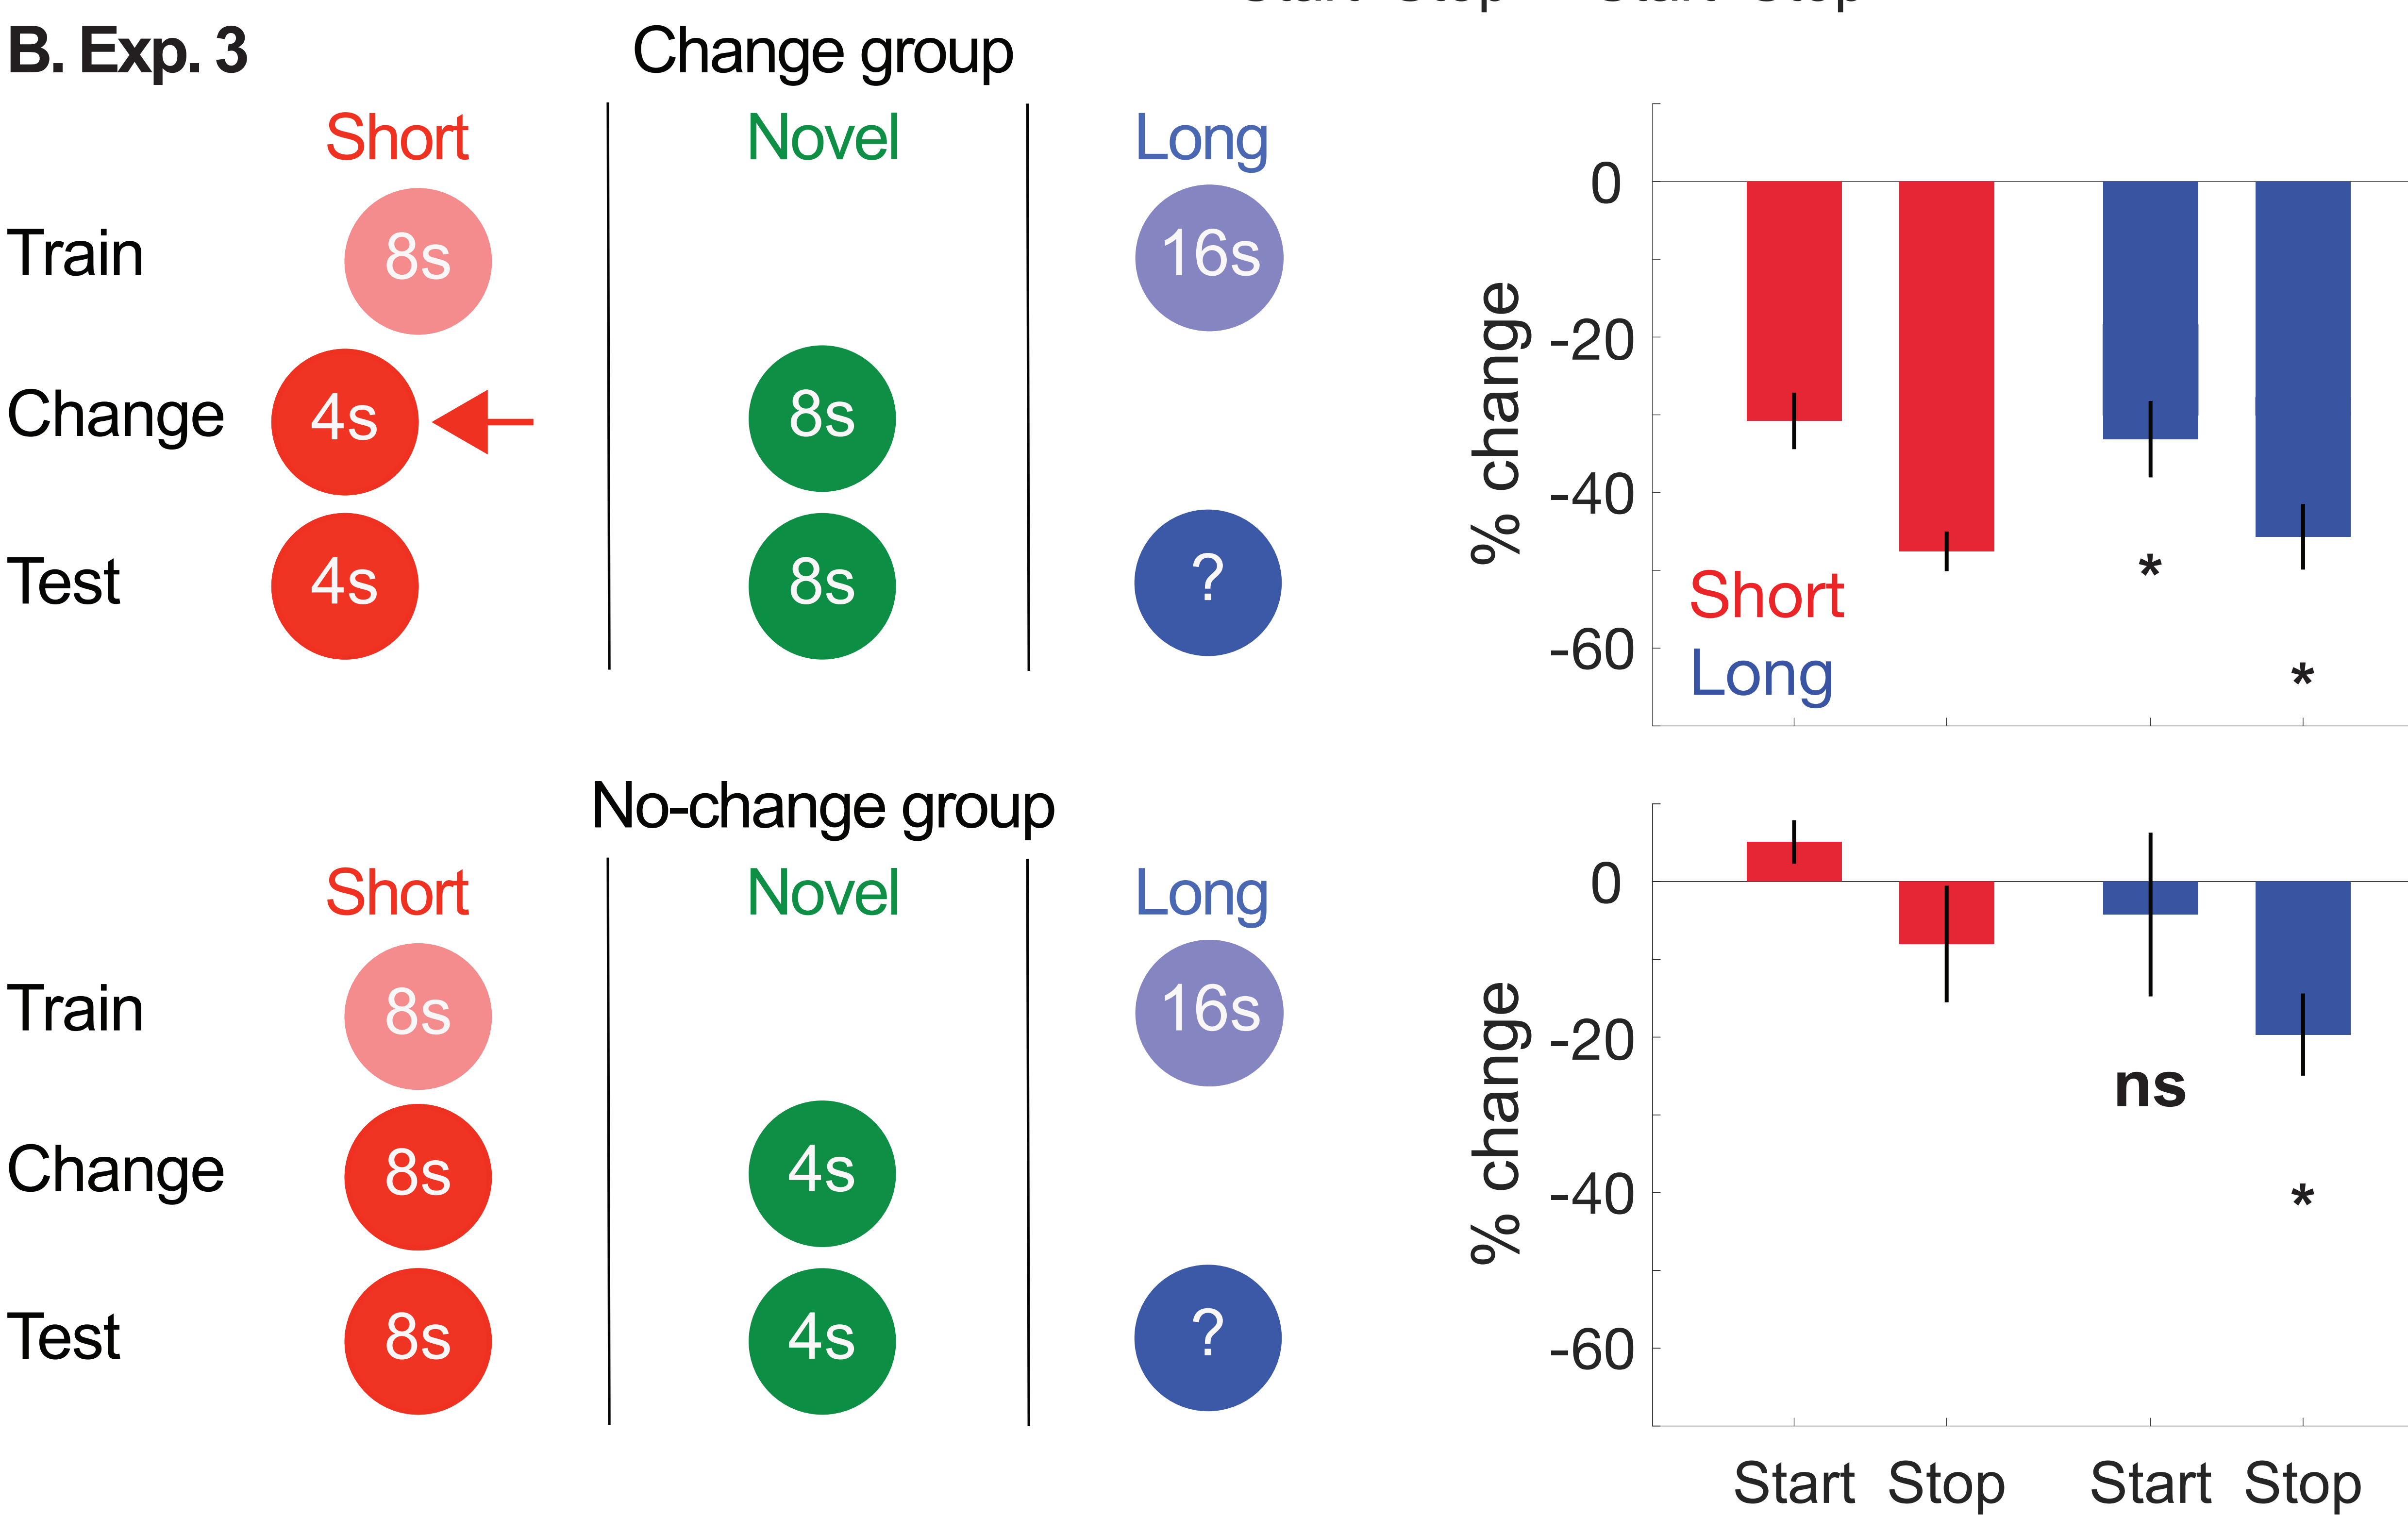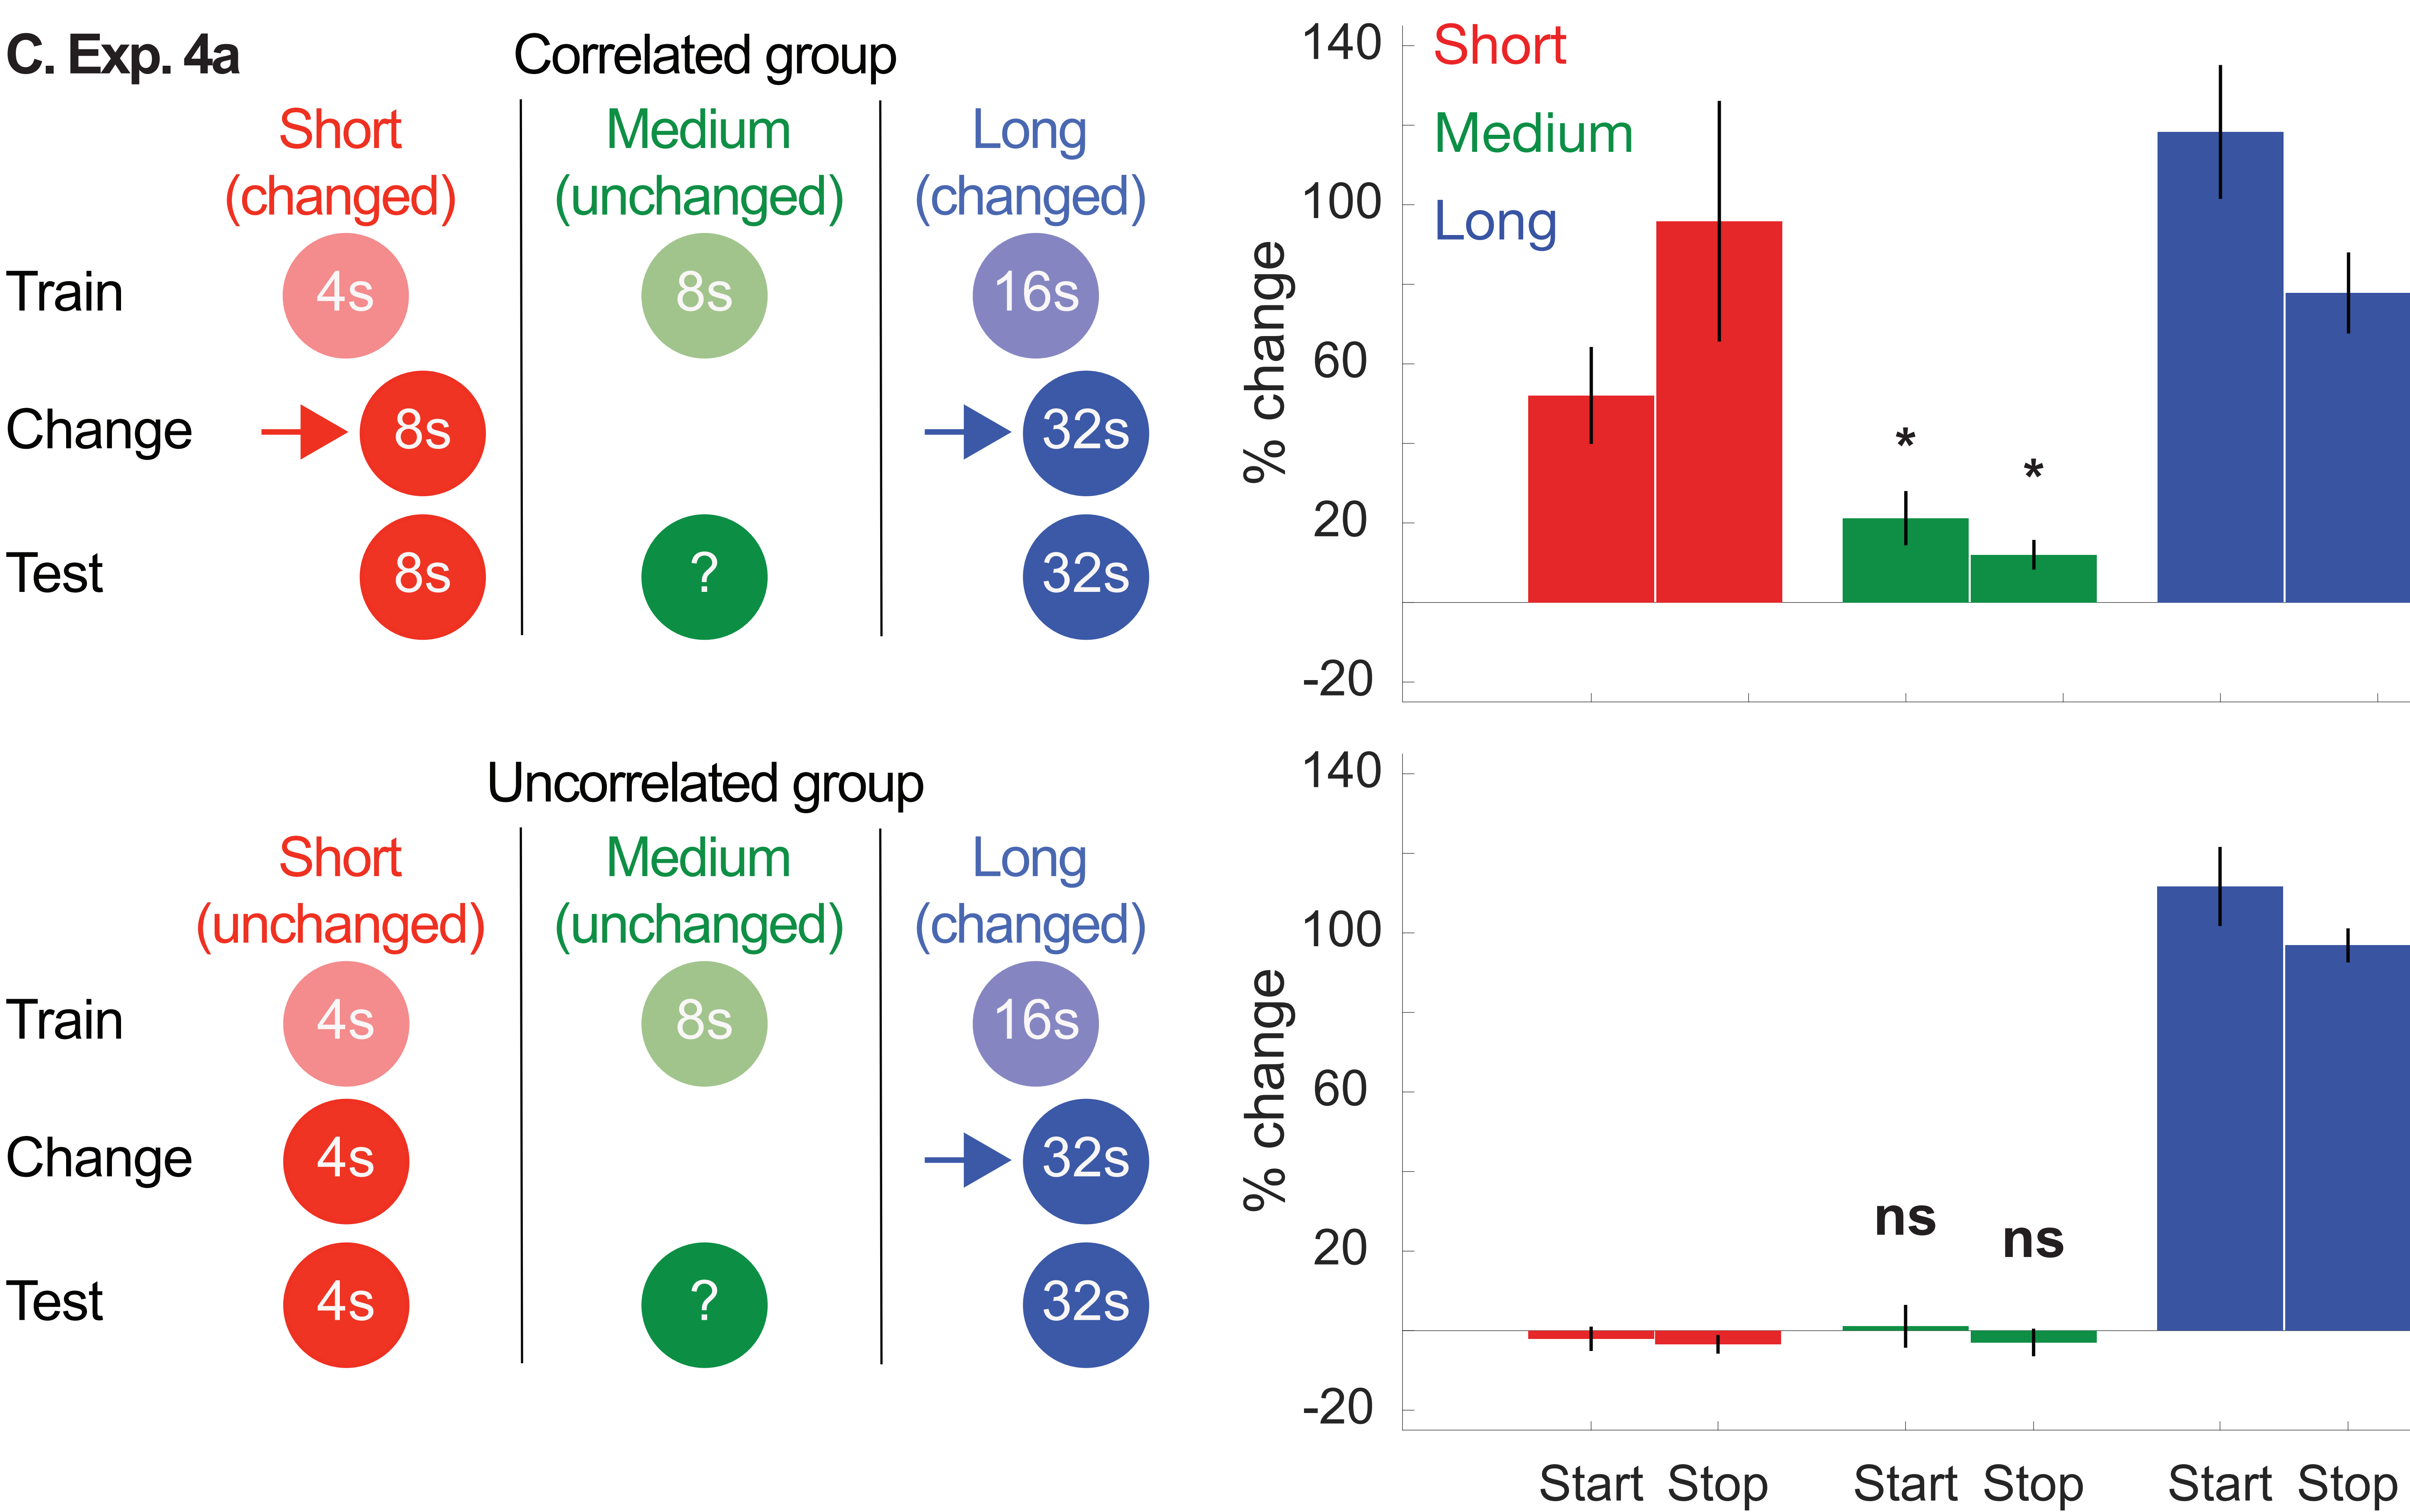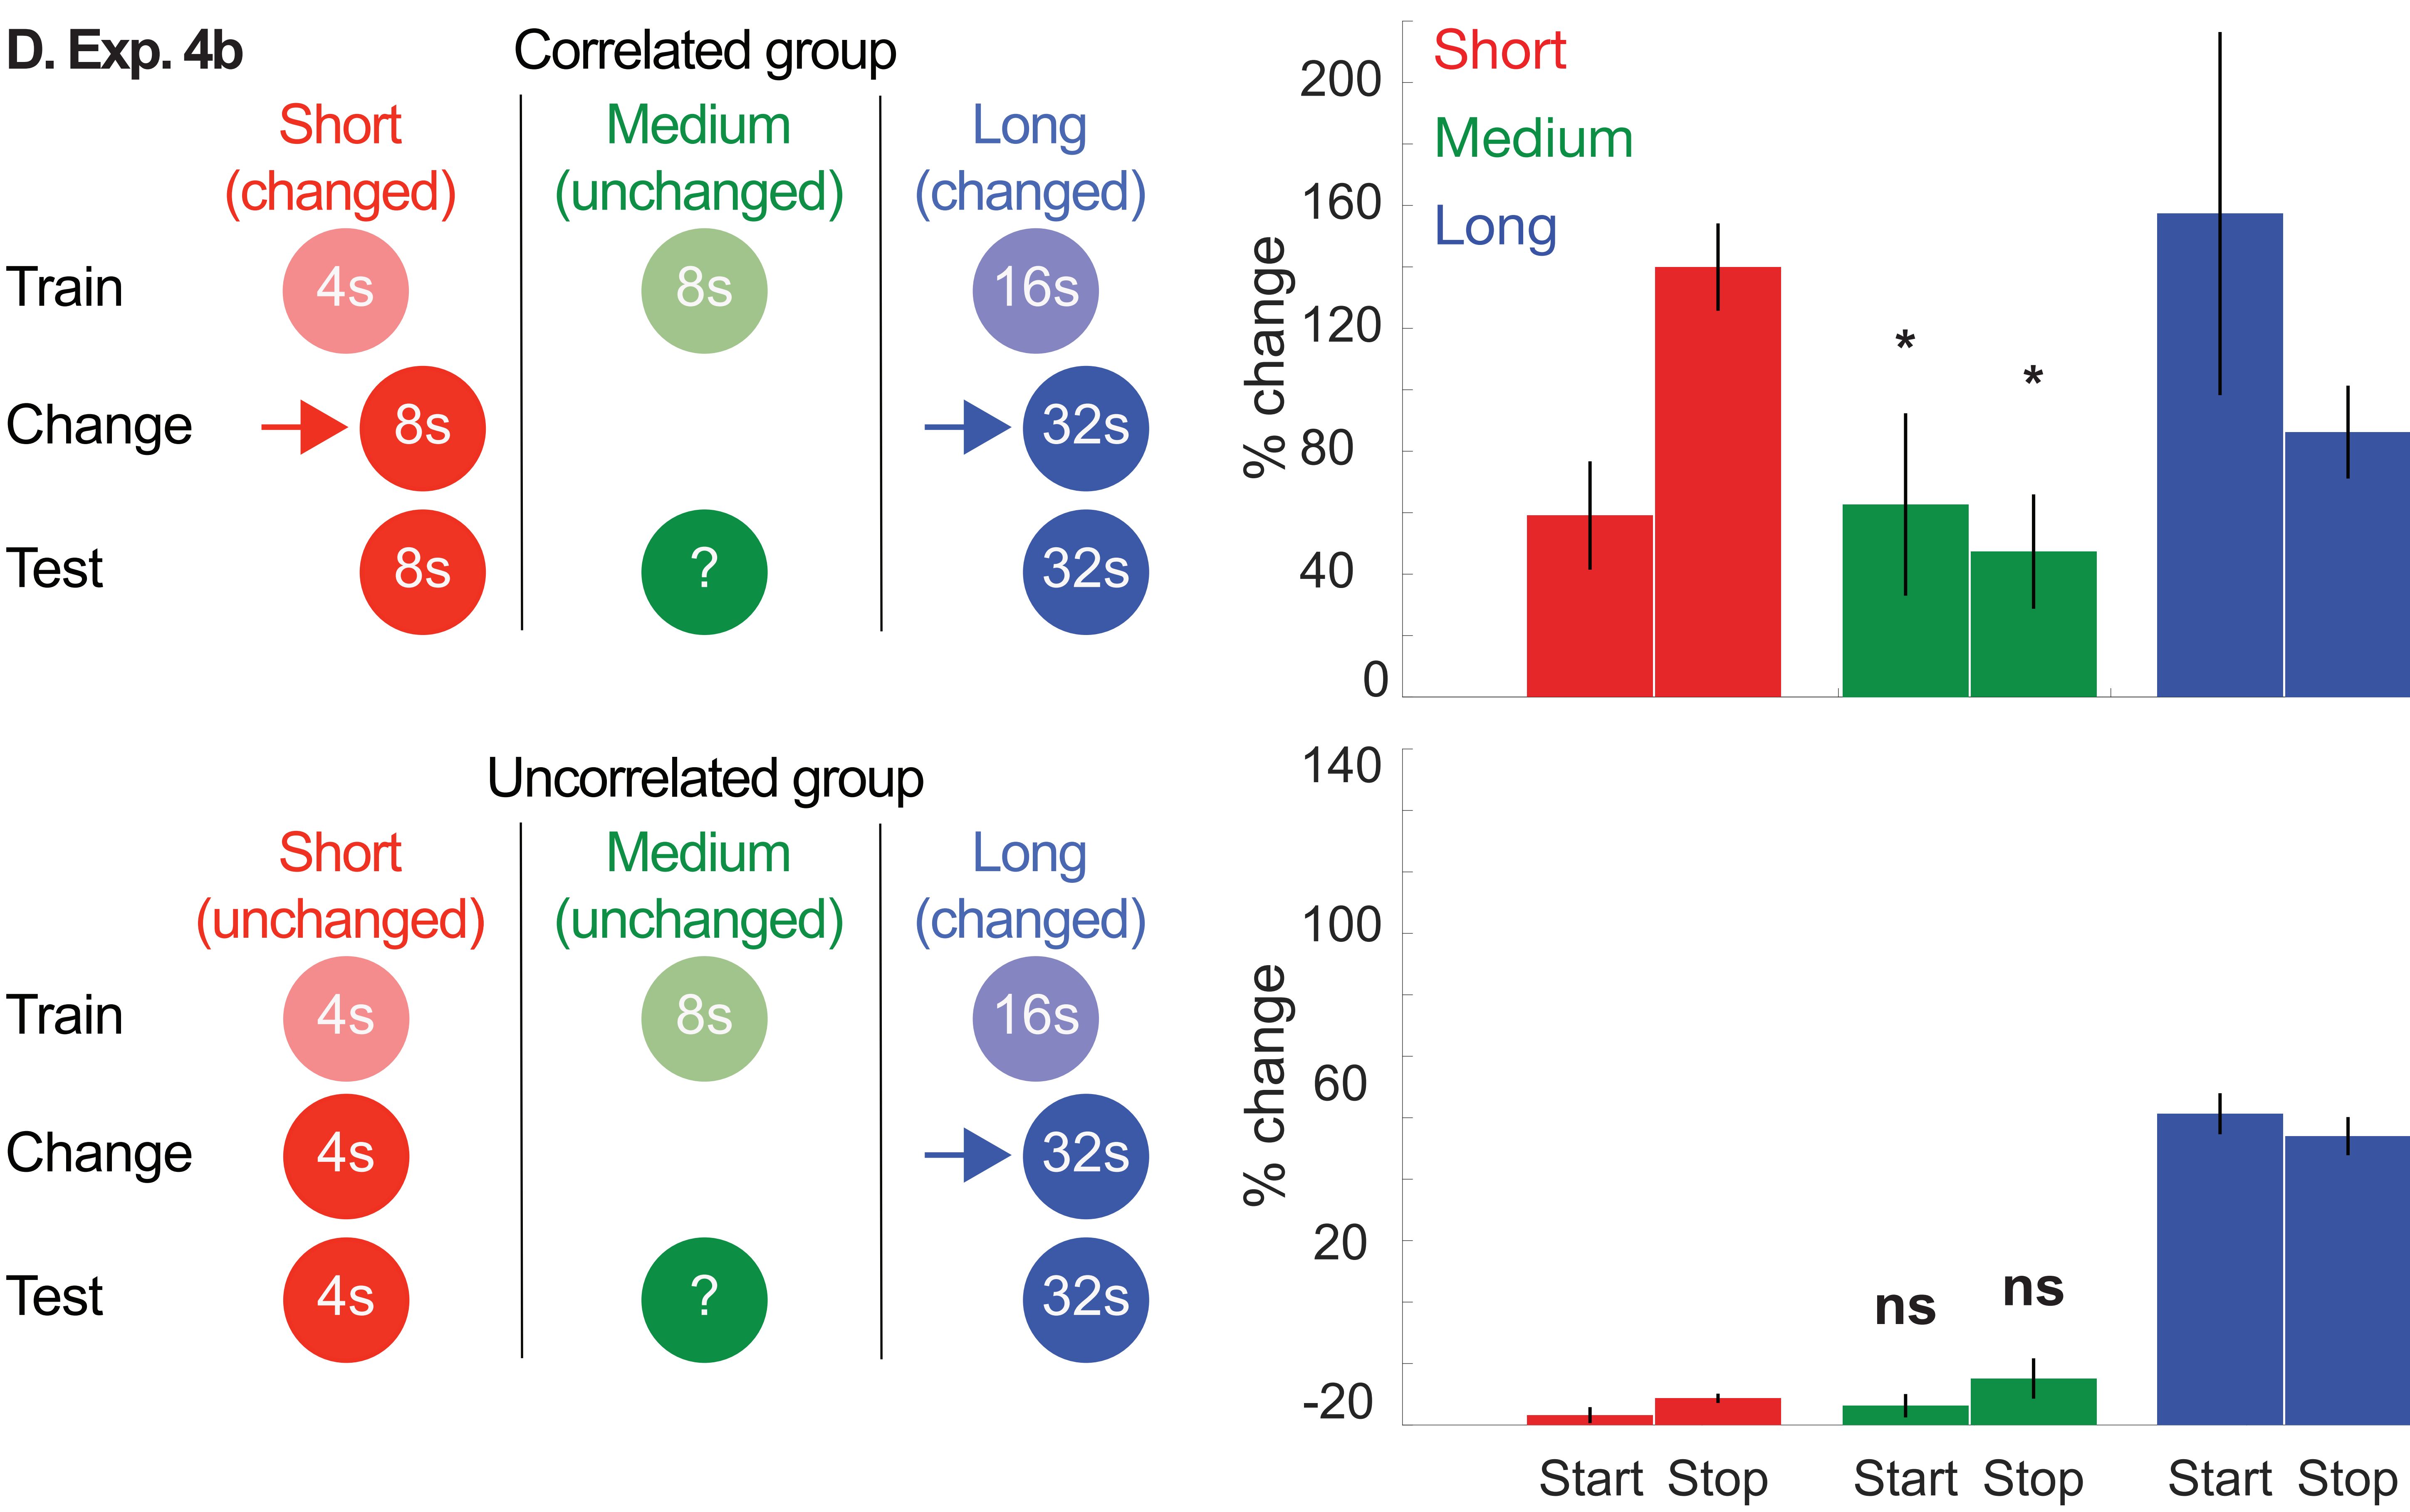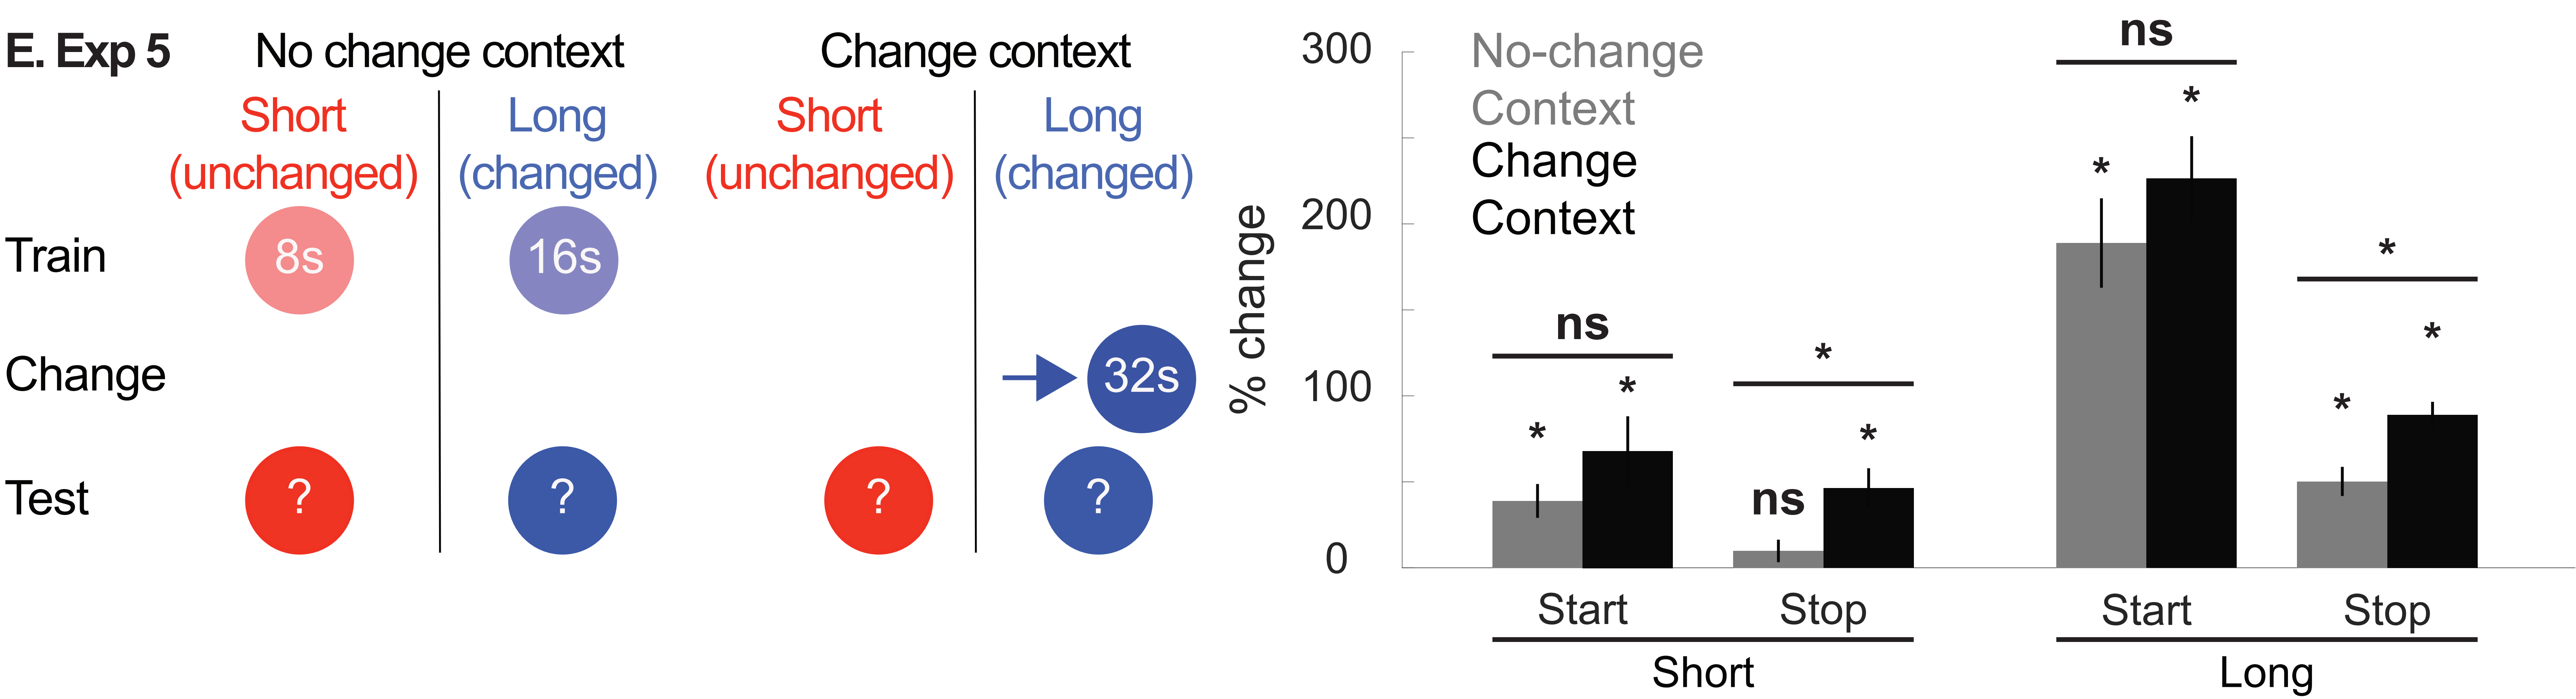

Supplement: supp [file elife-38790-supp-v1.zip › elife_poa_e38790_Figure_1_figure_supplement_3.pdf]

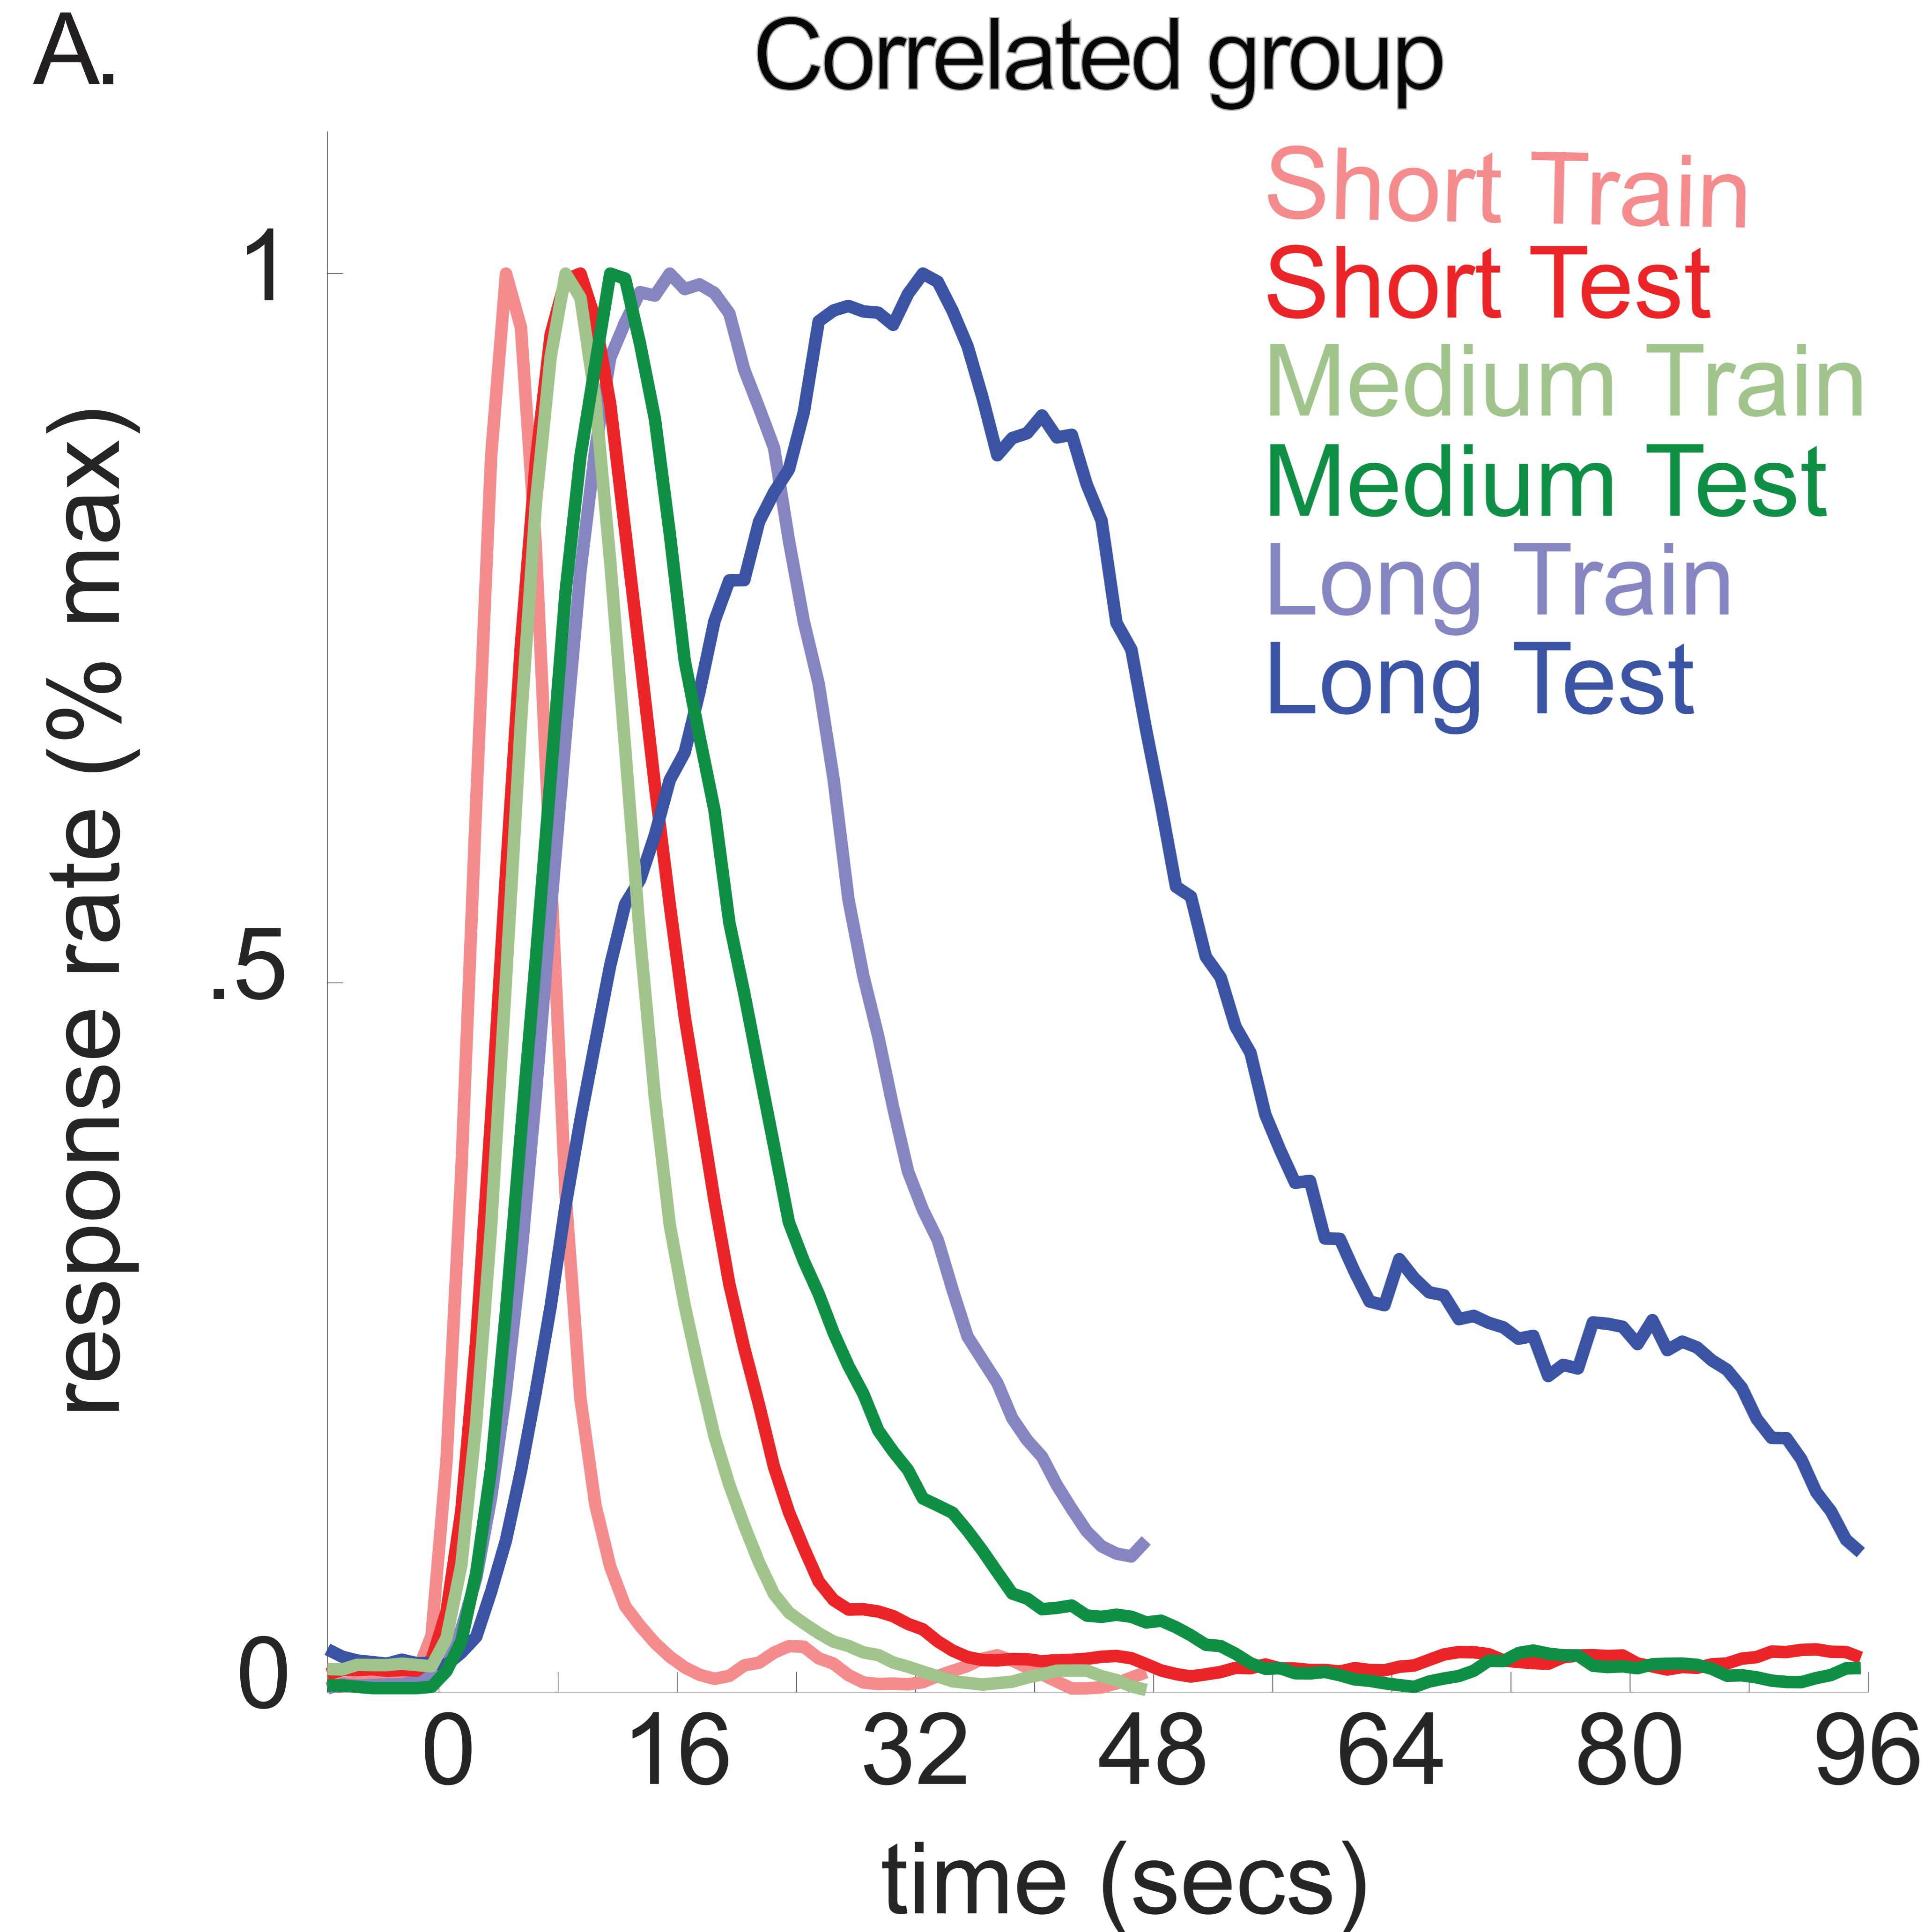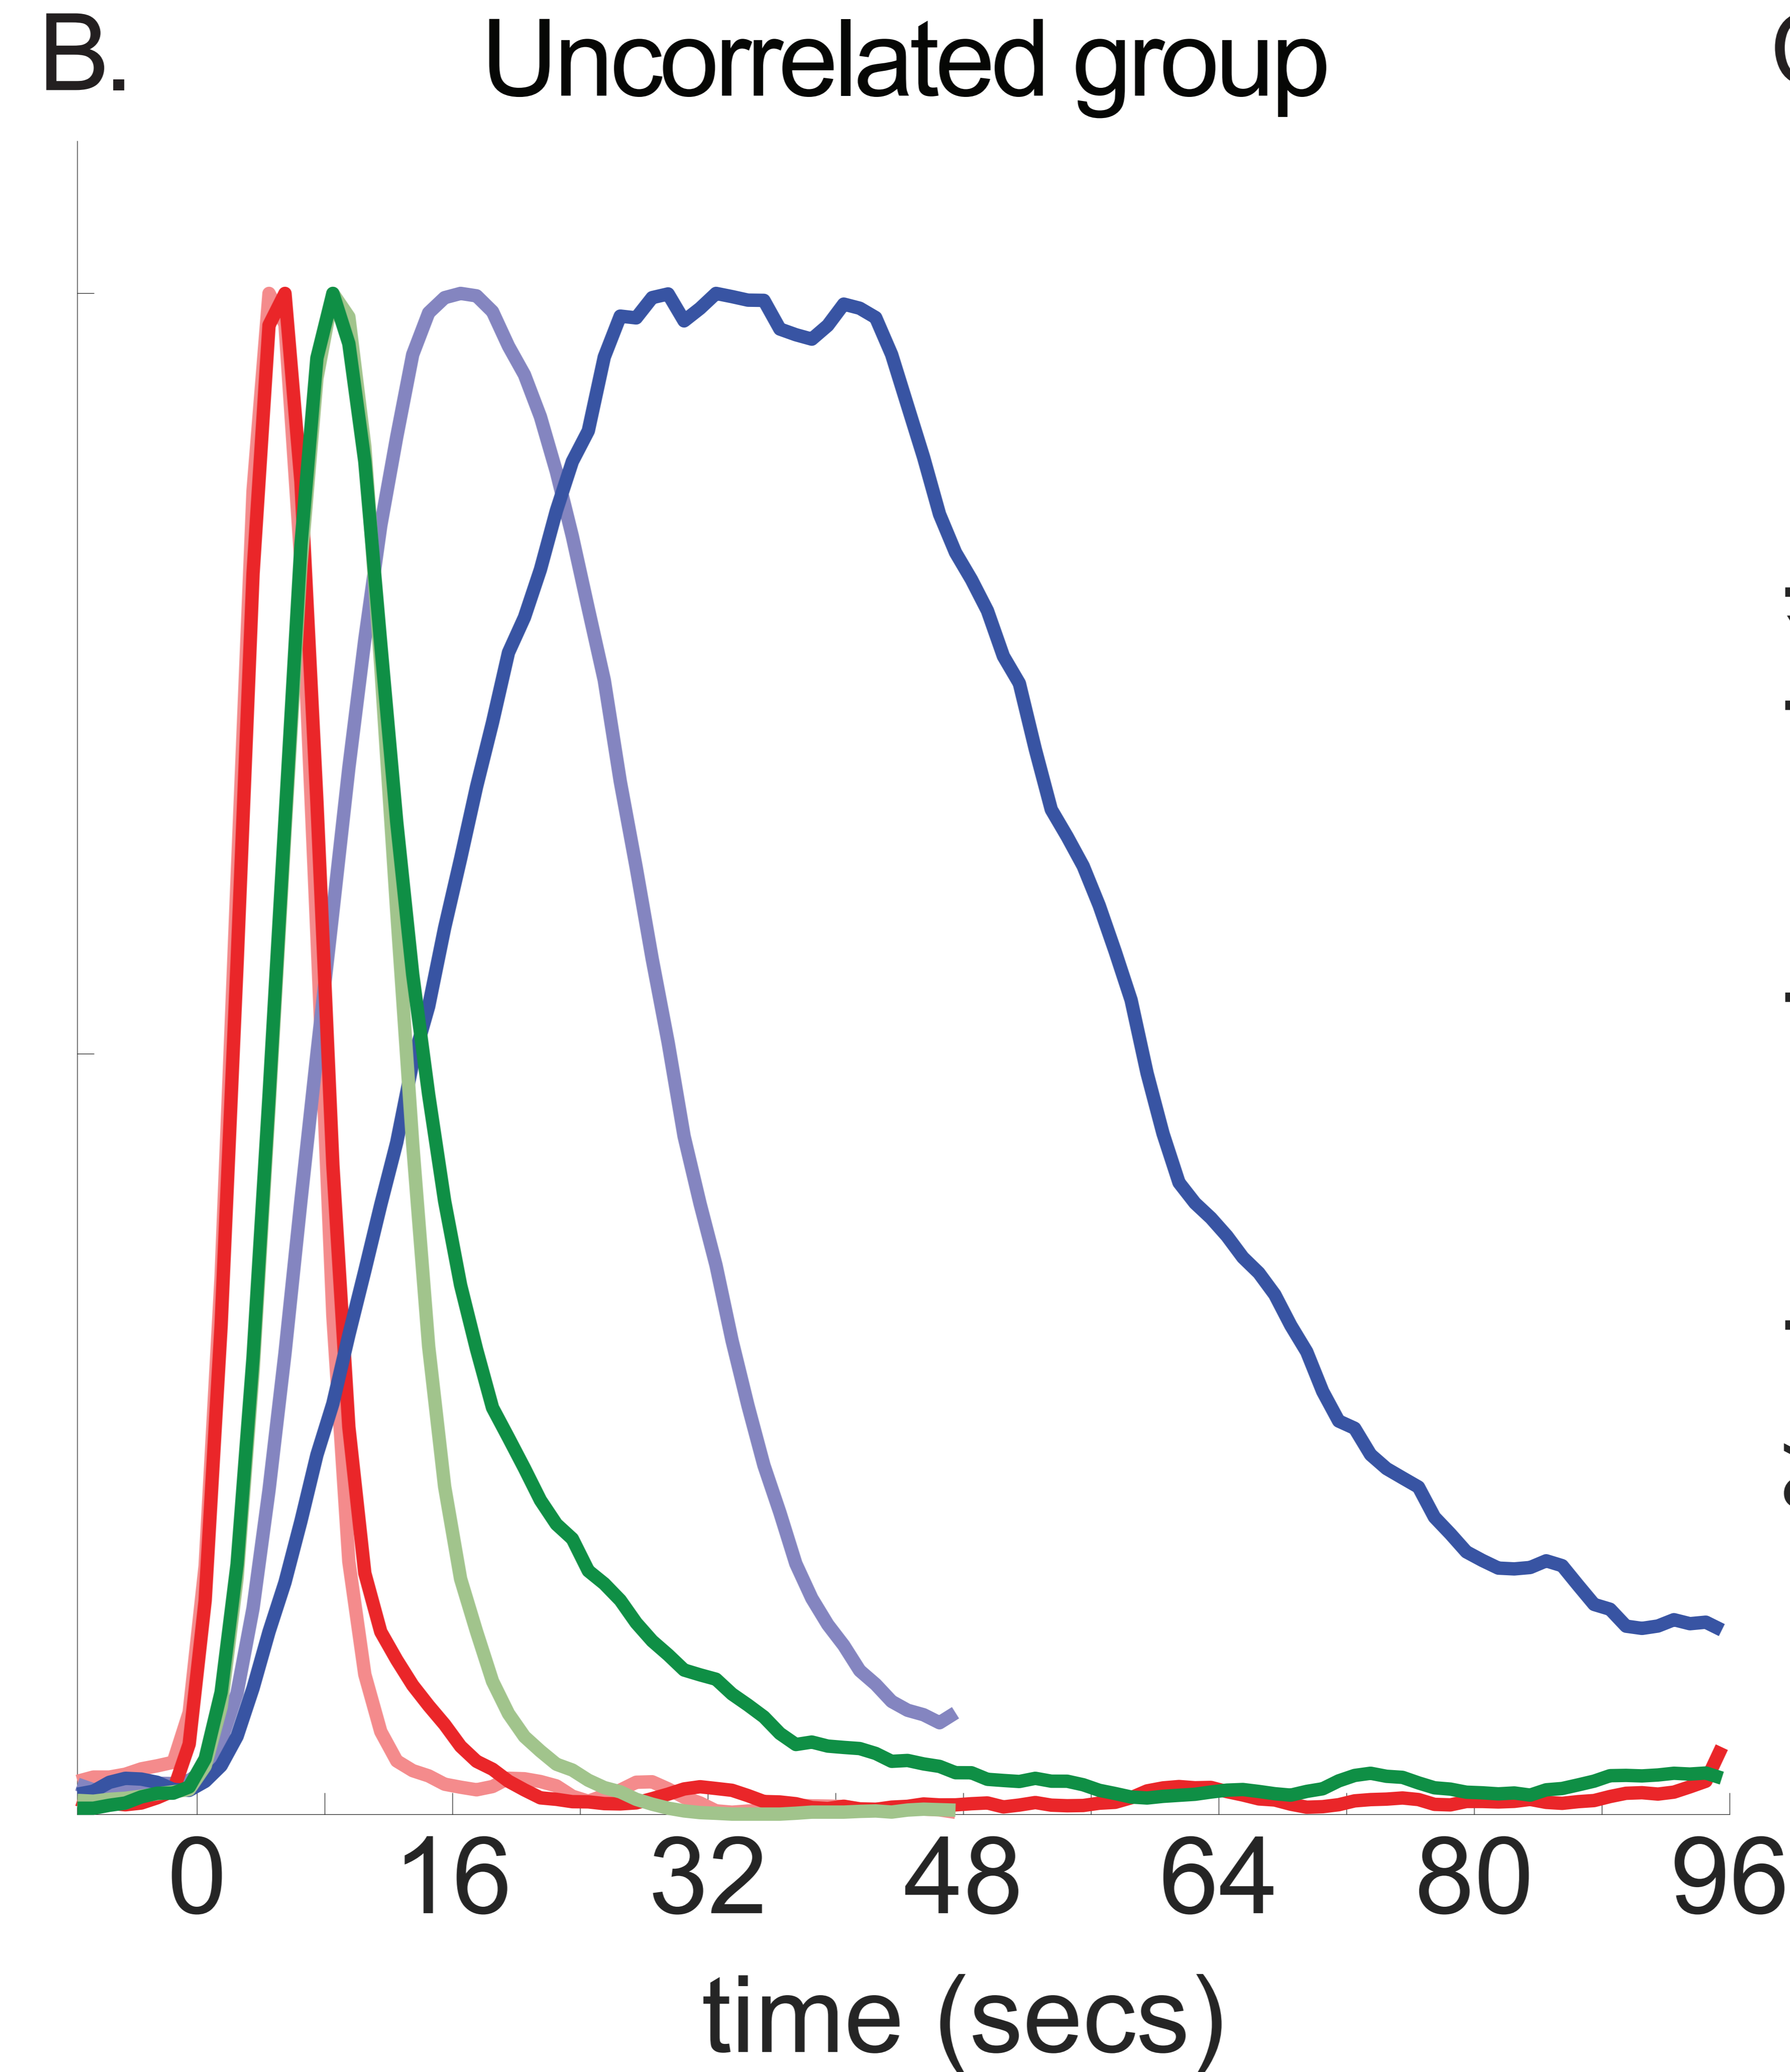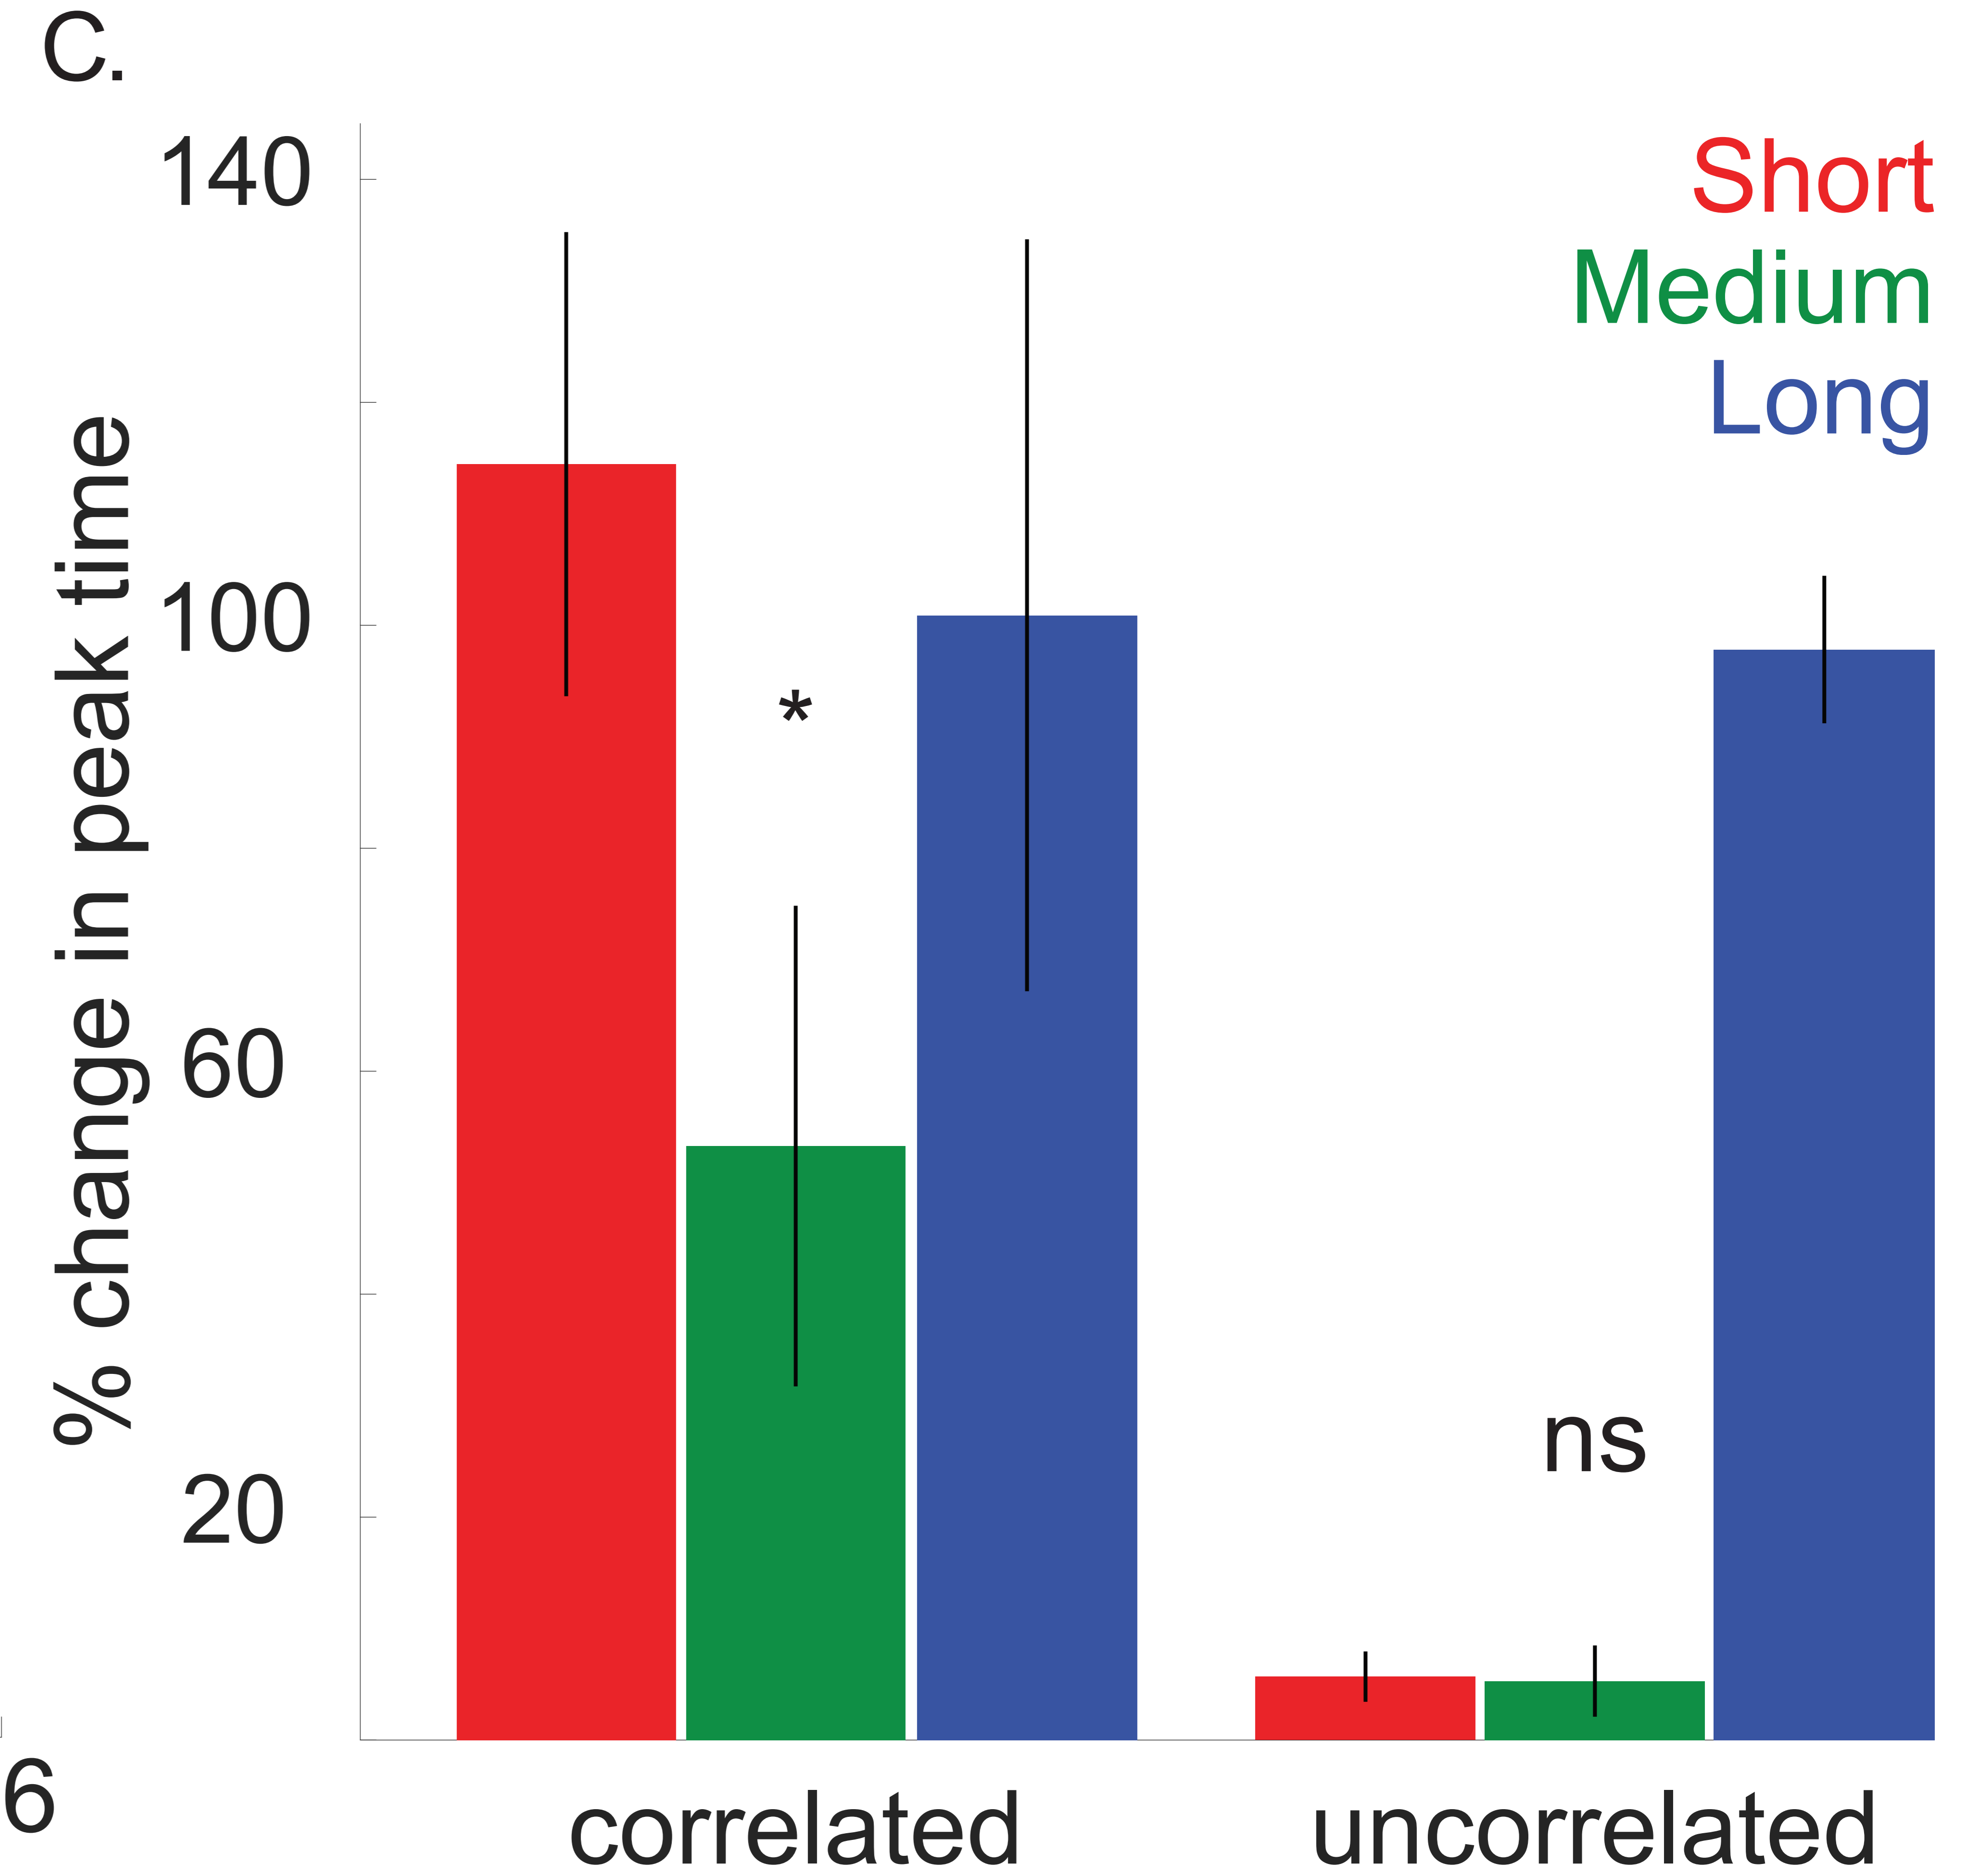

Supplement: supp [file elife-38790-supp-v1.zip › elife_poa_e38790_Figure_6_figure_supplement_1.pdf]

### A. 8-to-4 Group

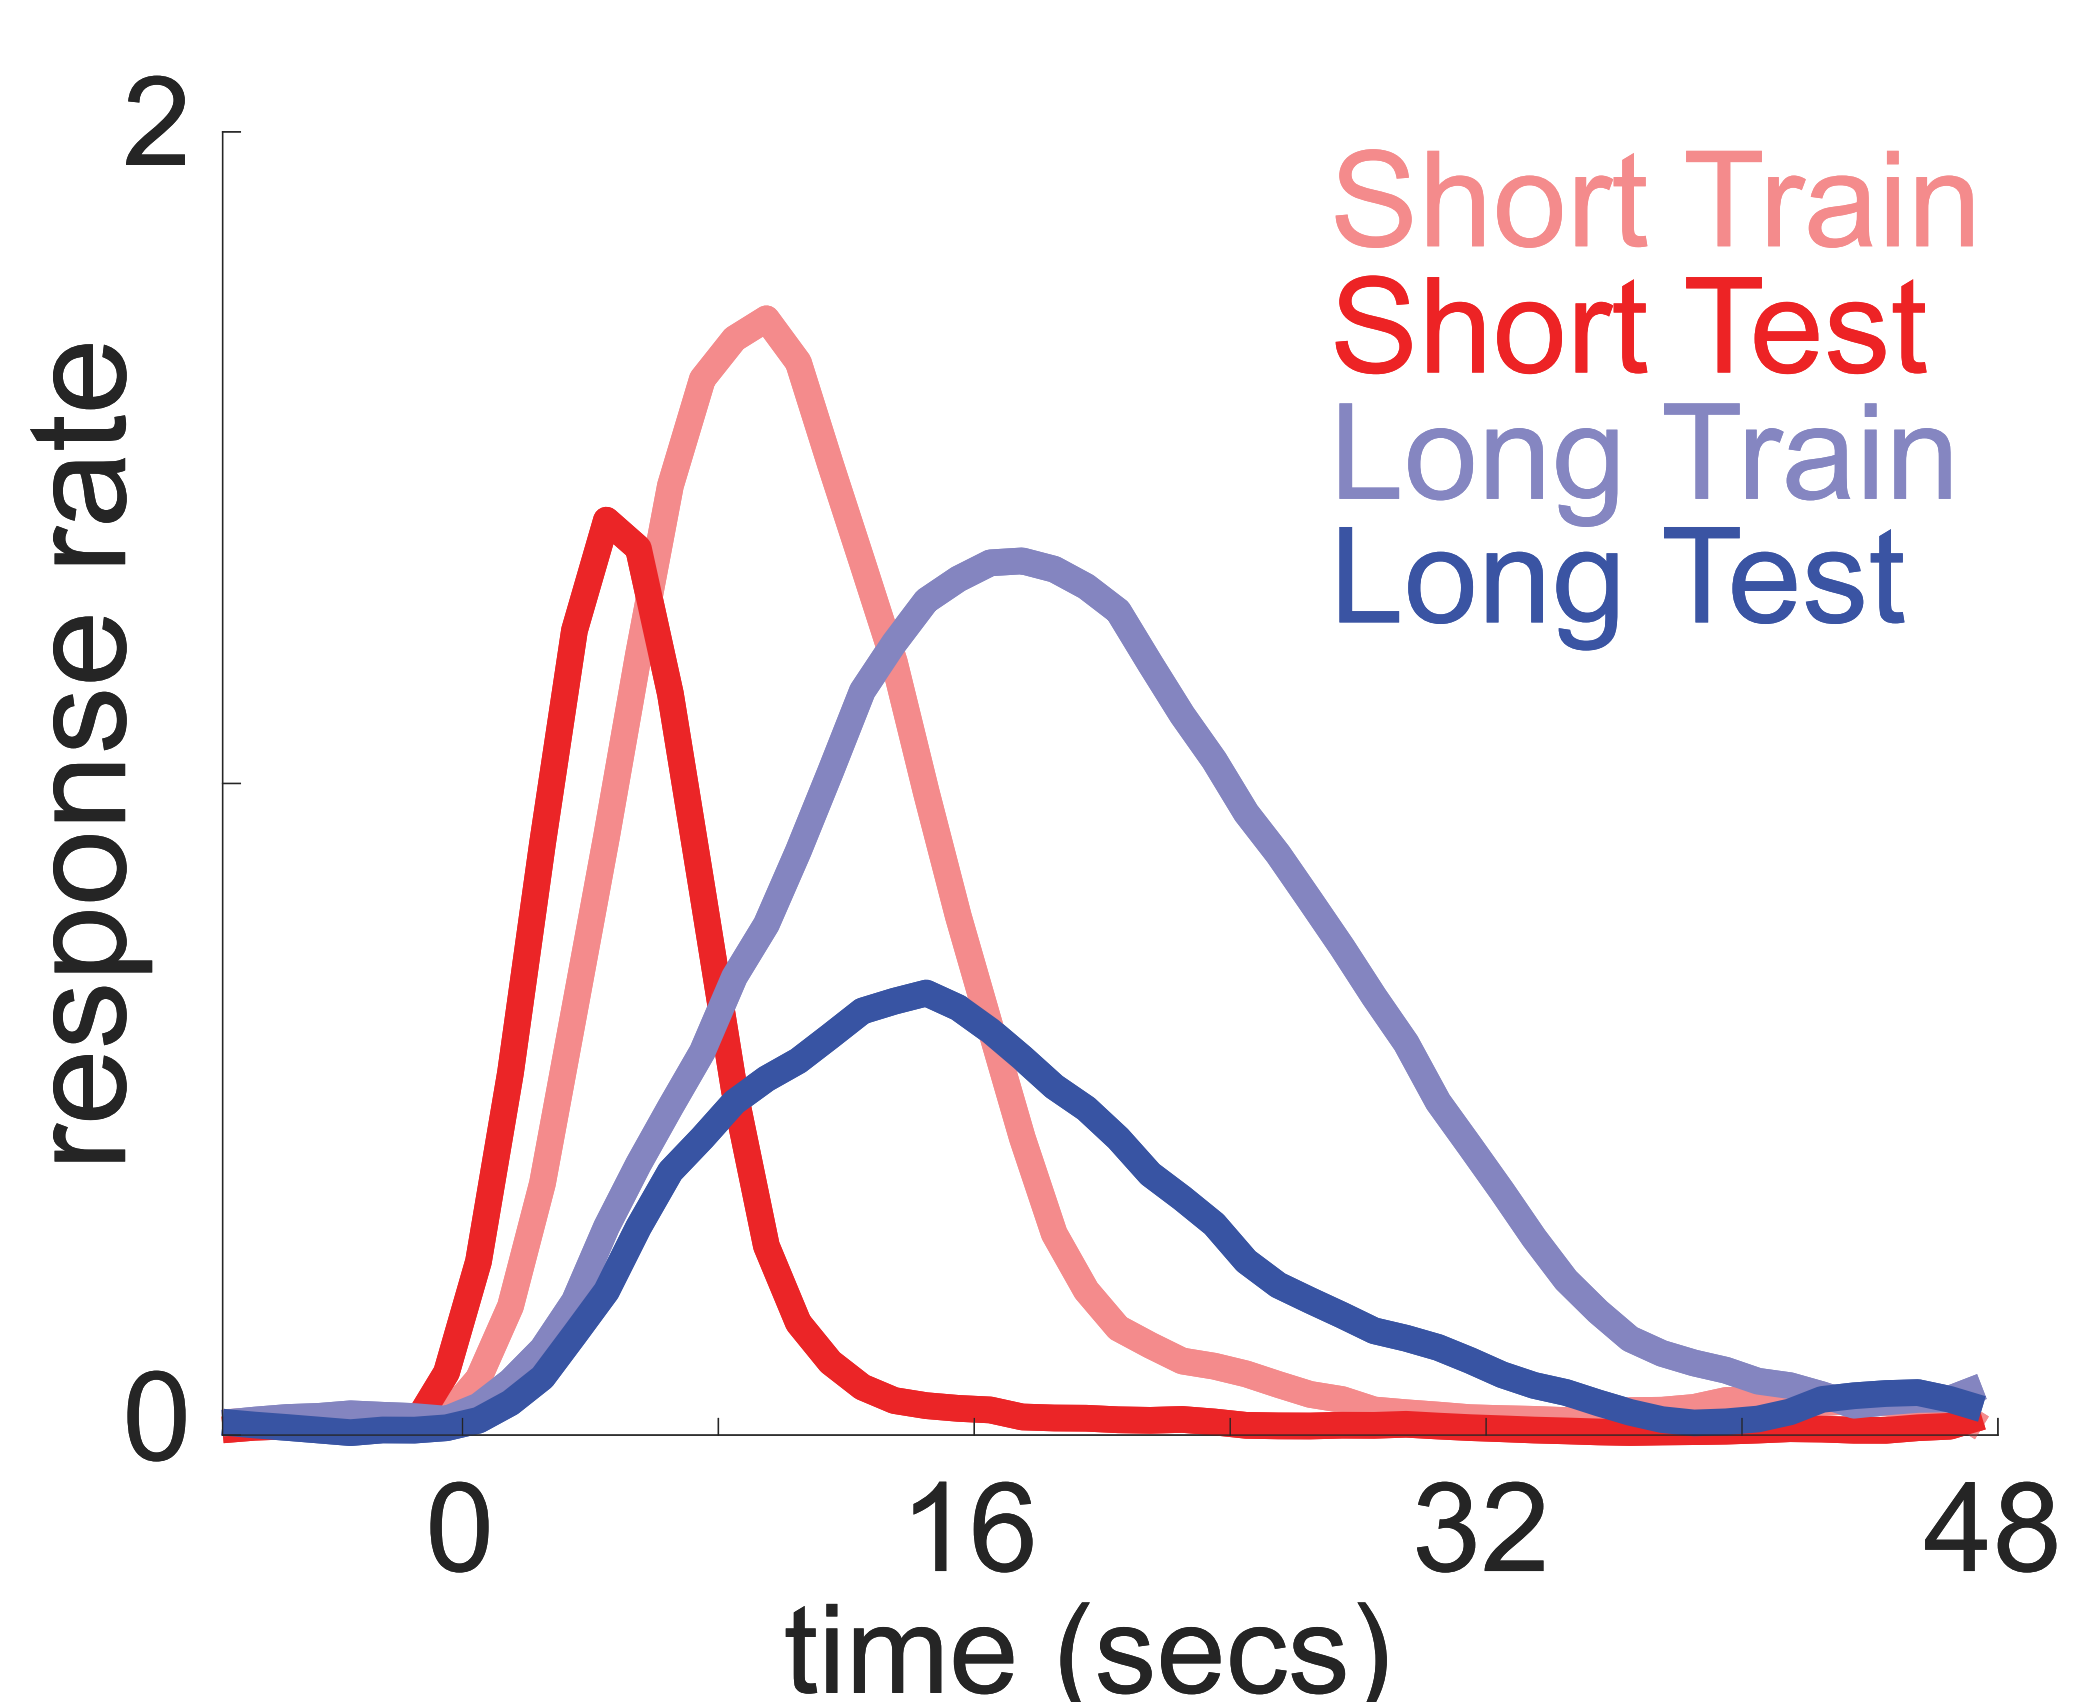

Supplement: supp [file elife_poa_e38790_Figure_1_figure_supplement_1.pdf › elife_poa_e38790_Figure_1_figure_supplement_1.pdf]
